# Supplementary material for: Access to axially chiral aryl 1,3-dienes by transient group directed asymmetric C–H alkenylations
Source: Royal Society of Chemistry journal article supplement (doi:10.1039/d2qo00161f), 2022-01-01
Supplement: d2qo00161f1.pdf [file d2qo00161f1.pdf]

---

**Supporting Information**

**For the article entitled**

**Access to Axially Chiral Aryl 1, 3-Dienes by Transient  
Group Directed Asymmetric C-H Alkenylations**

Cong Shen, Yuhang Zhu, Wenzhou Shen, Shuqi Jin, Guofu Zhong,\* Shuxin Luo, Lixia  
Xu, Liangjun Zhong, and Jian Zhang\*  
zgf@hznu.edu.cn; zhangjian@hznu.edu.cn

**Table of Contents**

|                                                                                               |     |
|-----------------------------------------------------------------------------------------------|-----|
| 1. General Methods.....                                                                       | 2   |
| 2. General Procedure for Substrate Synthesis.....                                             | 3   |
| 2.1 General Procedure A for Substrate Synthesis.....                                          | 3   |
| 2.2 General Procedure B for Substrate Synthesis.....                                          | 6   |
| 2.3 General Procedure C for Substrate Synthesis.....                                          | 10  |
| 3. Optimization of Reaction Conditions.....                                                   | 11  |
| 4. General Procedures D for the Cross-Couplings.....                                          | 13  |
| 5. Gram-Scaled Synthesis.....                                                                 | 28  |
| 6. Further Elaboration.....                                                                   | 28  |
| 7. Co <sup>III</sup> -catalyzed Enantioselective 1, 4-Addition of Indoles and Maleimides..... | 35  |
| 8. Density Functional Theory (DFT) Calculations.....                                          | 36  |
| 8.1 Computational Details and Rotational Barrier Calculated by DFT.....                       | 36  |
| 8.2 Enantiomeric conversion half-life calculation strategy.....                               | 37  |
| 9. References.....                                                                            | 43  |
| 10. NMR Charts.....                                                                           | 45  |
| 11. Copies of HPLC Analysis.....                                                              | 85  |
| 11.1 Copies of HPLC Analysis for $\beta$ -C-H Alkenylation product.....                       | 85  |
| 11.2 Copies of HPLC Analysis for 12 with different CCAs.....                                  | 110 |
| 12. X-ray Crystallography.....                                                                | 113 |

---

## 1. General Methods

Analytical thin layer chromatography (TLC) was performed using Merck 60 F254 precoated silica gel plate (0.2 mm thickness). Subsequent to elution, plates were visualized using UV radiation (254 nm) on Spectroline Model ENF-24061/F 254 nm. Further visualization was possible by staining with basic solution of potassium permanganate or acidic solution of ceric molybdate. Flash column chromatography was performed using Merck aluminium oxide 90 active neutral with freshly distilled solvents. Columns were typically packed as slurry and equilibrated with the appropriate solvent system prior to use. Proton nuclear magnetic resonance spectra ( $^1\text{H}$  NMR) were recorded on Bruker AMX 400 spectrophotometer ( $\text{CDCl}_3$  as solvent), and Bruker AMX 500 spectrophotometer ( $\text{CDCl}_3$  as solvent). Chemical shifts for  $^1\text{H}$  NMR spectra are reported as  $\delta$  in units of parts per million (ppm) downfield from  $\text{SiMe}_4$  ( $\delta$  0.0) and relative to the signal of chloroform-*d* ( $\delta$  7.26, singlet). Multiplicities were given as: s (singlet), d (doublet), t (triplet), dd (doublets of doublet) or m (multiplets). The number of protons (n) for a given resonance is indicated by nH. Coupling constants are reported as a J value in Hz. Carbon nuclear magnetic resonance spectra ( $^{13}\text{C}$  NMR) are reported as  $\delta$  in units of parts per million (ppm) downfield from  $\text{SiMe}_4$  ( $\delta$  0.0) and relative to the signal of chloroform-*d* ( $\delta$  77.0, triplet). Mass spectrometry was performed by Waters Q-ToF Premier Micromass instrument, using Electro Spray Ionization (ESI) mode. IR spectra were recorded as thin films on KBr plates on a Bio-Rad FTS 165 FTIR spectrometer and are reported in frequency of absorption ( $\text{cm}^{-1}$ ). The enantiomeric excesses (ee) of the products were determined by chiral stationary phase HPLC with Chiralpak (AD-H, OD-H, IA-H, IC-H, IB-H). Optical rotations were measured with Rudolph Autopol IVT. The single crystal X-ray diffraction studies were carried out on a Bruker D8 Venture diffractometer.  $\text{Pd}(\text{OAc})_2$  were purchased from TCI and used directly. Other reagents, unless otherwise noted below, are commercially available from TCI, Energy Chemical, Alfa Aesar (China) Chemical Co. Ltd. and used without further purification.

## 2. General Procedure for Substrate Synthesis

### 2.1 General Procedure A for Substrate Synthesis

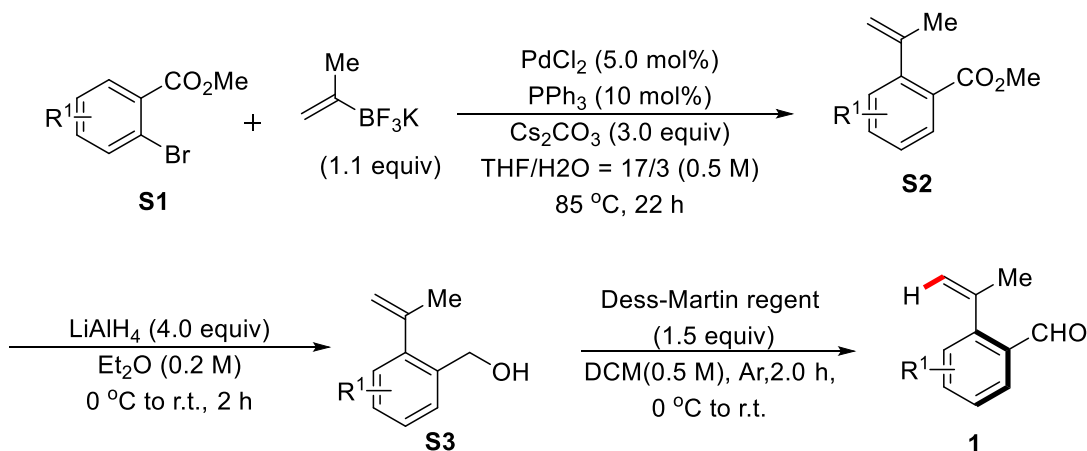

**General Procedure for Heck Reaction:** A solution of potassium vinyl trifluoro borate (1.1 equiv), PdCl<sub>2</sub> (5.0 mol%), PPh<sub>3</sub> (10 mol%), Cs<sub>2</sub>CO<sub>3</sub> (3.0 equiv), and substituted ester (**S1**) (5.00 mmol) in THF/H<sub>2</sub>O (17:3) (0.5 M) was heated at 85 °C under N<sub>2</sub> atmosphere in a sealed tube. The reaction mixture was stirred at 85 °C for 22 h, then cooled to r.t. and diluted with H<sub>2</sub>O (3 mL) followed by extraction with EtOAc (30 mL × 3). The solvent was removed in vacuo, and the crude product was purified by silica gel chromatography (SiO<sub>2</sub>, PE/EA = 98/2) to obtain the corresponding product Ester (**S2**).

**General Procedure for Ester Reduction<sup>[1]</sup>** : To a solution of substituted Ester (**S2**) in Et<sub>2</sub>O (0.2 M) was added dropwise LiAlH<sub>4</sub> (4.0 equiv) over 30 min at 0 °C and stirred for 2 h at r.t. 2 M HCl was added slowly until a clear solution was obtained. The Et<sub>2</sub>O layer was separated and the aqueous phase was extracted with Et<sub>2</sub>O (20 mL × 3). Combined the organic layers and dried over Na<sub>2</sub>SO<sub>4</sub>. After removing the solvent under reduced pressure, the residue was purified by column chromatography on silica gel with PE/EA to obtain the corresponding product alcohol (**S3**).

**General Procedure for Aldehyde Preparation<sup>[2]</sup>** : To a solution of Dess-Martin reagent (1.5 equiv) in DCM (0.5 M) was added dropwise substituted alcohol (**S3**) at 0 °C and stirred at r.t. for 2 h. The solvent was removed in vacuo, and the resulting residue was purified by silica gel column chromatography to obtain the

corresponding product benzaldehyde derivatives (**1**).

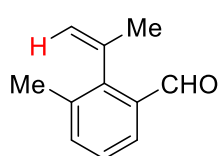

**3-methyl-2-(prop-1-en-2-yl) benzaldehyde (1a)**

Following the general procedure A, **1a** was obtained as a yellow oil (0.6 g, 75% yield for three steps).

**<sup>1</sup>H NMR** (500 MHz, CDCl<sub>3</sub>)

δ 10.19 (s, 1H), 7.77 (d, J = 8.0 Hz, 1H), 7.43 (d, J = 8.0 Hz, 1H), 7.29 (t, J = 7.5 Hz, 1H), 5.48 (t, J = 1.5 Hz, 1H), 4.92 – 4.91 (m, 1H), 2.33 (s, 3H), 2.08 (s, 3H).

**<sup>13</sup>C NMR** (125 MHz, CDCl<sub>3</sub>)

δ 191.85, 146.24, 140.31, 134.89, 134.60, 132.02, 126.04, 123.85, 117.01, 24.39, 17.76.

**HRMS (ESI)** for C<sub>11</sub>H<sub>13</sub>O [M+ H]<sup>+</sup>: 161.0961, found: 161.0969.

**FTIR** (KBr, cm<sup>-1</sup>)

3441.54, 3423.43, 2354.21, 1650.47, 1630.84, 1557.94, 1504.67, 1398.13, 1022.43.

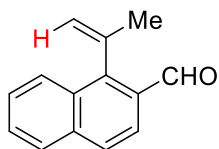

**1-(prop-1-en-2-yl)-2-naphthaldehyde (1b)**

Following the general procedure A, **1b** was obtained as a reddish brown oil (0.68 g, 69% yield for three steps).

**<sup>1</sup>H NMR** (500 MHz, CDCl<sub>3</sub>)

δ 10.42 (s, 1H), 8.11 (dd, J = 8.5, 1.0 Hz, 1H), 7.97 (d, J = 8.5 Hz, 1H), 7.88 (d, J = 8.0 Hz, 1H), 7.82 (d, J = 8.5 Hz, 1H), 7.64 – 7.61 (m, 1H), 7.58 – 7.55 (m, 1H), 5.74 (t, J = 1.5 Hz, 1H), 5.16 (s, 1H), 2.27 (s, 3H).

**<sup>13</sup>C NMR** (125 MHz, CDCl<sub>3</sub>)

δ 191.65, 147.75, 138.86, 135.25, 129.83, 128.33, 127.81, 127.38, 126.75, 125.87, 125.68, 121.12, 118.84, 25.75.

**HRMS (ESI)** for C<sub>14</sub>H<sub>13</sub>O [M+ H]<sup>+</sup>: 197.0961, found: 197.0962.

---

**FTIR** (KBr,  $\text{cm}^{-1}$ )

3473.23, 3442.38, 3417.86, 2982.24, 2931.78, 1675.70, 1653.27, 1630.84, 1605.61,  
1409.35, 1386.92, 1266.36, 1106.54, 1025.23, 798.13.

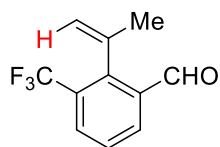

**2-(prop-1-en-2-yl)-3-(trifluoromethyl) benzaldehyde (1c)**

Following the general procedure A, **1c** was obtained as a light yellow oil (0.44 g,  
55% yield for three steps).

**<sup>1</sup>H NMR** (500 MHz,  $\text{CDCl}_3$ )

$\delta$  10.24 (s, 1H), 8.12 (dd,  $J = 7.5, 1.0$  Hz, 1H), 7.91 (d,  $J = 8.0$  Hz, 1H), 7.53 (t,  $J = 7.5$  Hz,  
1H), 5.55 (t,  $J = 1.5$  Hz, 1H), 5.08 (s, 1H), 2.16 (s, 3H).

**<sup>13</sup>C NMR** (125 MHz,  $\text{CDCl}_3$ )

$\delta$  190.12, 145.12 (d,  $J_{CF} = 1.8$  Hz), 137.32, 133.00, 130.38 (q,  $J_{CF} = 5.3$  Hz), 129.65,  
128.25 (q,  $J_{CF} = 29.9$  Hz), 126.58, 122.67 (q,  $J_{CF} = 272.4$  Hz), 119.00 (d,  $J_{CF} = 1.4$  Hz),  
25.76.

**<sup>19</sup>F NMR** (471 MHz,  $\text{CDCl}_3$ )

$\delta$  -58.32.

**HRMS (ESI)** for  $\text{C}_{11}\text{H}_{10}\text{OF}_3$   $[\text{M} + \text{H}]^+$ : 215.0678, found: 215.0687.

**FTIR** (KBr,  $\text{cm}^{-1}$ )

3424.87, 2923.36, 2357.01, 1664.49, 1653.27, 1639.25, 1400.93, 1386.92, 1028.04,  
798.13, 666.36.

## 2.2 General Procedure B for Substrate Synthesis

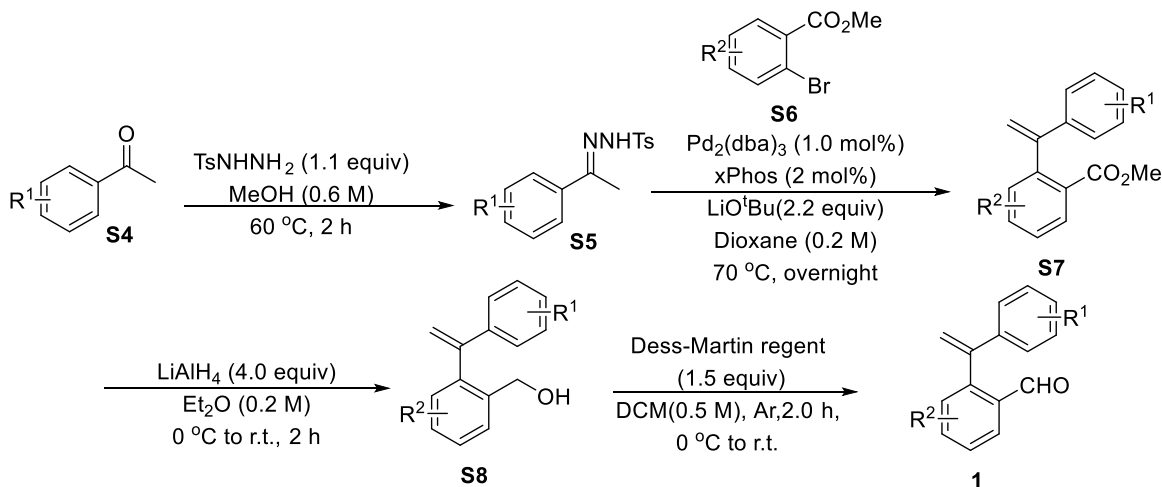

**General Procedure for Hydrazone Preparation**<sup>[3]</sup>: To a solution of TsNHNH<sub>2</sub> (1.1 equiv) in MeOH (0.5 M) was added dropwise substituted ketone (**S4**) at 60 °C and stirred for 2 h. The solvent was removed in vacuo, and the resulting residue was purified by silica gel column chromatography (PE / EA = 1 / 1) to obtain the corresponding product (**S5**).

**General Procedure for Heck Reaction**: A solution of Pd<sub>2</sub>(dba)<sub>3</sub> (1.0 mol%), X-Phos (2.0 mol%), LiO<sup>t</sup>Bu (2.2 equiv), substituted ester (**S6**) (5.00 mmol) and Hydrazone (**S5**) (5.00 mmol) in Dioxane (0.2 M) was heated stirred at 85 °C overnight under Ar atmosphere in a sealed tube. Then cooled to r.t. and diluted with H<sub>2</sub>O (20 mL) followed by extraction with EtOAc (30 mL × 3). The solvent was removed in vacuo, and the crud product was purified by silica gel chromatography (SiO<sub>2</sub>, PE/EA = 98/2) to obtain the corresponding product (**S7**).

**Ester Reduction and Aldehyde Preparation** were conducted following the general procedure A.

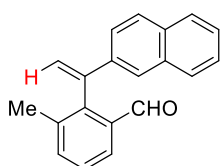

**3-methyl-2-(1-(naphthalen-2-yl) vinyl) benzaldehyde (1d)**

Following the general procedure B, **1d** was obtained as a yellow oil (0.33 g, 24% yield for four steps).

**<sup>1</sup>H NMR** (500 MHz, CDCl<sub>3</sub>)

δ 10.11 (s, 1H), 7.92 (dd, *J* = 8.0, 1.5 Hz, 1H), 7.83 (d, *J* = 8.5 Hz, 1H), 7.80 (dd, *J* = 8.0,

1.5 Hz, 1H), 7.68 – 7.65 (m, 2H), 7.50 (d,  $J = 7.5$  Hz, 1H), 7.45 – 7.42 (m, 3H), 7.39 (d,  $J = 2.0$  Hz, 1H), 6.28 (s, 1H), 5.29 (s, 1H), 2.17 (s, 3H).

**<sup>13</sup>C NMR** (125 MHz, CDCl<sub>3</sub>)

$\delta$  192.08, 143.70, 142.65, 136.55, 135.61, 134.76, 133.80, 132.28, 132.03, 127.51, 127.35, 126.78, 126.52, 125.45, 125.40, 125.14, 123.73, 122.21, 116.93, 18.34.

**HRMS (ESI)** for C<sub>20</sub>H<sub>16</sub>ONa [M+ Na]<sup>+</sup>: 295.1093, found: 295.1095.

**FTIR** (KBr, cm<sup>-1</sup>)

3447.66, 3385.98, 1686.92, 1653.27, 1633.64, 1557.94, 1406.54, 1395.33, 1025.23.

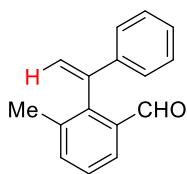

**3-methyl-2-(1-phenylvinyl) benzaldehyde (1e)**

Following the general procedure B, **1e** was obtained as a yellow oil (0.31 g, 28% yield for four steps).

**<sup>1</sup>H NMR** (500 MHz, CDCl<sub>3</sub>)

$\delta$  10.08 (s, 1H), 7.87 (d,  $J = 7.5$  Hz, 1H), 7.48 (d,  $J = 7.5$  Hz, 1H), 7.39 (t,  $J = 7.5$  Hz, 1H), 7.32 – 7.29 (m, 3H), 7.27 – 7.26 (m, 2H), 6.15 (s, 1H), 5.21 (s, 1H), 2.15 (s, 3H).

**<sup>13</sup>C NMR** (125 MHz, CDCl<sub>3</sub>)

$\delta$  192.13, 143.71, 142.74, 138.30, 136.48, 134.69, 133.72, 127.71, 127.25, 126.69, 125.09, 123.69, 116.48, 18.35.

**HRMS (ESI)** for C<sub>16</sub>H<sub>15</sub>O [M+ H]<sup>+</sup>: 223.1117, found: 223.1127.

**FTIR** (KBr, cm<sup>-1</sup>)

3472.92, 3443.15, 3417.11, 3395.61, 3385.11, 2359.81, 2334.58, 1650.47, 1633.64, 1395.33, 1263.55, 1022.43.

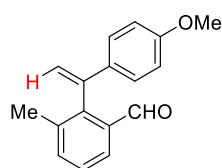

**2-(1-(4-methoxyphenyl)vinyl)-3-methylbenzaldehyde (1f)**

Following the general procedure B, **1f** was obtained as a yellow oil (0.37 g, 29%

yield for four steps).

**<sup>1</sup>H NMR** (500 MHz, CDCl<sub>3</sub>)

δ 10.07 (s, 1H), 7.86 (d, *J* = 7.5 Hz, 1H), 7.47 (d, *J* = 7.5 Hz, 1H), 7.38 (t, *J* = 7.5 Hz, 1H), 7.19 (d, *J* = 8.5 Hz, 2H), 6.83 (d, *J* = 8.5 Hz, 2H), 6.03 (s, 1H), 5.09 (s, 1H), 3.79 (s, 3H), 2.16 (s, 3H).

**<sup>13</sup>C NMR** (125 MHz, CDCl<sub>3</sub>)

δ 192.25, 158.64, 144.04, 142.04, 136.44, 134.63, 133.66, 131.04, 126.57, 126.38, 123.55, 114.40, 113.03, 54.27, 18.26.

**HRMS (ESI)** for C<sub>17</sub>H<sub>17</sub>O<sub>2</sub> [M+ H]<sup>+</sup>: 253.1223, found: 253.1217.

**FTIR** (KBr, cm<sup>-1</sup>)

3417.50, 3386.70, 2962.62, 2923.36, 2856.07, 1653.27, 1630.84, 1400.93, 1263.55, 1028.04, 798.13.

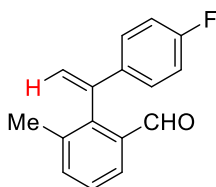

**2-(1-(4-fluorophenyl)vinyl)-3-methylbenzaldehyde (1g)**

Following the general procedure B, **1g** was obtained as a colorless oil (0.54 g, 45% yield for four steps).

**<sup>1</sup>H NMR** (500 MHz, CDCl<sub>3</sub>)

δ 10.07 (s, 1H), 7.86 (d, *J* = 7.5 Hz, 1H), 7.48 (d, *J* = 7.5 Hz, 1H), 7.40 (t, *J* = 7.5 Hz, 1H), 7.25 – 7.22 (m, 2H), 7.02 – 6.98 (m, 2H), 6.09 (s, 1H), 5.19 (s, 1H), 2.15 (s, 3H).

**<sup>13</sup>C NMR** (125 MHz, CDCl<sub>3</sub>)

δ 191.88, 161.68 (d, *J*<sub>CF</sub> = 247.0 Hz), 143.35, 141.70, 136.38, 134.78, 134.49 (d, *J*<sub>CF</sub> = 3.4 Hz), 133.63, 126.84, 126.82 (d, *J*<sub>CF</sub> = 8.1 Hz), 123.90, 116.17 (d, *J*<sub>CF</sub> = 1.6 Hz), 114.66 (d, *J*<sub>CF</sub> = 21.5 Hz), 18.29.

**<sup>19</sup>F NMR** (471 MHz, CDCl<sub>3</sub>)

δ-113.46

**HRMS (ESI)** for C<sub>16</sub>H<sub>14</sub>OF [M+ H]<sup>+</sup>: 241.1023, found: 241.1019.



---

**FTIR** (KBr,  $\text{cm}^{-1}$ )

3445.33, 3422.81, 2959.81, 2357.01, 1675.70, 1647.66, 1560.75, 1504.67, 1395.33,  
1384.11, 1025.23, 795.33.

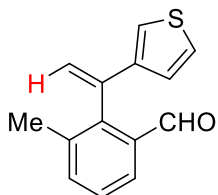

**3-methyl-2-(1-(thiophen-3-yl)vinyl)benzaldehyde (1h)**

Following the general procedure B, **1h** was obtained as a yellow oil (0.33g, 24% yield for four steps).

**<sup>1</sup>H NMR** (500 MHz,  $\text{CDCl}_3$ )

$\delta$  10.06 (s, 1H), 7.85 (d,  $J = 8.0$  Hz, 1H), 7.49 – 7.48 (m, 1H), 7.40 – 7.37 (m, 1H), 7.34 – 7.32 (m, 2H), 6.68 (dd,  $J = 3.0, 1.5$  Hz, 1H), 6.04 (s, 1H), 5.15 (s, 1H), 2.21 (s, 3H).

**<sup>13</sup>C NMR** (125 MHz,  $\text{CDCl}_3$ )

$\delta$  192.02, 143.68, 141.13, 137.89, 136.25, 135.22, 134.69, 126.71, 125.59, 123.68,  
123.50, 122.74, 115.09, 18.10.

**HRMS (ESI)** for  $\text{C}_{14}\text{H}_{12}\text{OSNa}$   $[\text{M} + \text{Na}]^+$ : 251.0501, found: 251.0499.

**FTIR** (KBr,  $\text{cm}^{-1}$ )

3444.86, 3414.02, 2351.40, 2328.97, 1734.58, 1686.92, 1653.27, 1636.25, 1563.55,  
1504.67, 1406.54, 1022.43, 669.16.

## 2.3 General Procedure C for Substrate Synthesis

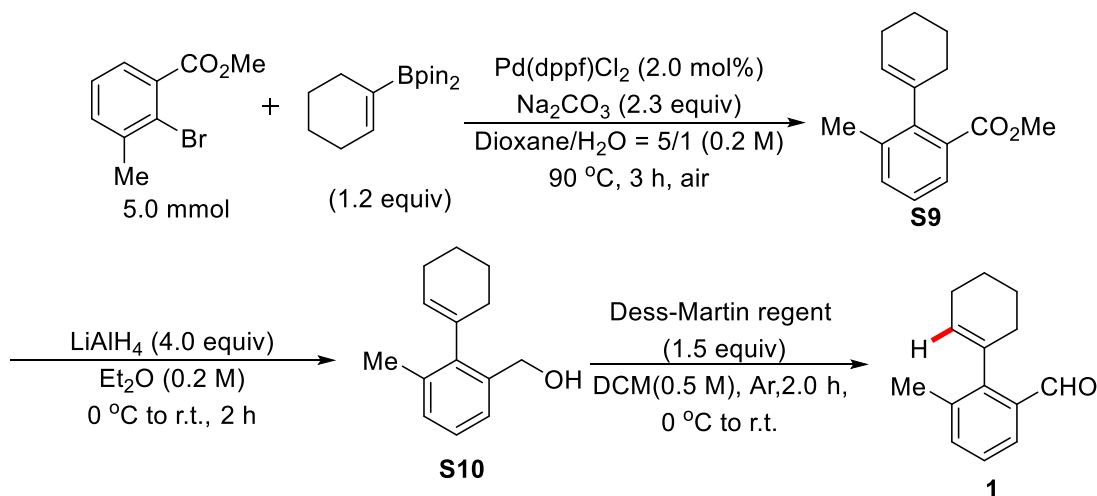

**General Procedure for Suzuki Reaction:** A solution of Pd(dppf)Cl<sub>2</sub> (0.1 mmol, 2.0 mol%), Na<sub>2</sub>CO<sub>3</sub> (11.5 mmol, 2.3 equiv), methyl 2-bromo-3-methylbenzoate (5.0 mmol, 1.0 equiv) and 2-(cyclohex-1-en-1-yl)-4,4,5,5-tetramethyl-1,3,2-dioxaborolane (6.00 mmol, 1.2 equiv) in Dioxane/H<sub>2</sub>O (5/1, 0.2M) was heated at 90 °C under N<sub>2</sub> atmosphere in a sealed tube. The reaction mixture was stirred at 90 °C for 3 h, then cooled to rt and diluted with H<sub>2</sub>O (20 mL) followed by extraction with EtOAc (30 mL × 3). The solvent was removed in vacuo, and the crude product was purified by silica gel chromatography (SiO<sub>2</sub>, PE/EtOAc) to obtain the corresponding product (**S9**).

**Ester Reduction and Aldehyde Preparation** were conducted following the general procedure A.

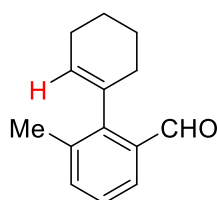

### 6-Methyl-2',3',4',5'-tetrahydro-[1,1'-biphenyl]-2-carbaldehyde (**1i**)

Following the procedure C, **1i** was obtained as a light yellow oil (0.7 g, 70% yield for three steps).

**<sup>1</sup>H NMR** (500 MHz, CDCl<sub>3</sub>)

δ 10.17 (s, 1H), 7.75 (d, *J* = 8.0 Hz, 1H), 7.41 (d, *J* = 7.5 Hz, 1H), 7.28 – 7.25 (m, 1H), 5.63 – 5.60 (m, 1H), 2.29 (s, 3H), 2.26 – 2.21 (m, 3H), 2.10 – 2.03 (m, 1H), 1.84 – 1.78 (m, 2H), 1.77 – 1.70 (m, 2H).

**<sup>13</sup>C NMR** (125 MHz, CDCl<sub>3</sub>)

$\delta$  192.30, 147.08, 135.65, 134.48, 133.31, 132.66, 128.17, 125.77, 123.48, 30.41,  
24.35, 21.73, 20.96, 17.80.

**HRMS (ESI)** for  $C_{14}H_{17}O$   $[M+H]^+$ : 201.1274, found: 201.1265.

**FTIR** (KBr,  $cm^{-1}$ )

3473.28, 3442.36, 3422.95, 1653.27, 1633.64, 1538.32, 1507.48, 1403.74, 1022.43.

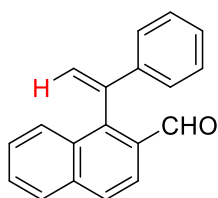

**1-(1-phenylvinyl)-2-naphthaldehyde (1j)**

Following the general procedure C, **1j** was obtained as an orange oil (0.67 g, 26% yield for four steps).

**$^1H$  NMR** (500 MHz,  $CDCl_3$ )

$\delta$  10.31 (s, 1H), 8.06 (d,  $J = 8.5$  Hz, 1H), 7.99 (d,  $J = 8.5$  Hz, 1H), 7.91 (dd,  $J = 12.5, 8.5$  Hz, 2H), 7.61 – 7.58 (m, 1H), 7.46 – 7.43 (m, 1H), 7.33 – 7.27 (m, 5H), 6.38 (s, 1H), 5.42 (s, 1H).

**$^{13}C$  NMR** (125 MHz,  $CDCl_3$ )

$\delta$  191.90, 144.78, 141.54, 139.05, 135.29, 131.02, 130.28, 127.82, 127.77, 127.43,  
127.38, 127.27, 126.42, 126.01, 125.18, 121.14, 118.13.

**HRMS (ESI)** for  $C_{19}H_{14}OK$   $[M+K]^+$ : 297.0676, found: 297.0691.

**FTIR** (KBr,  $cm^{-1}$ )

3474.05, 3441.95, 3422.82, 2959.81, 2926.17, 1656.07, 1639.25, 1538.32, 145421,  
1398.13, 1022.43.

### 3. Optimization of Reaction Conditions

Table S1. Preliminary Screening of TCAs<sup>a</sup>

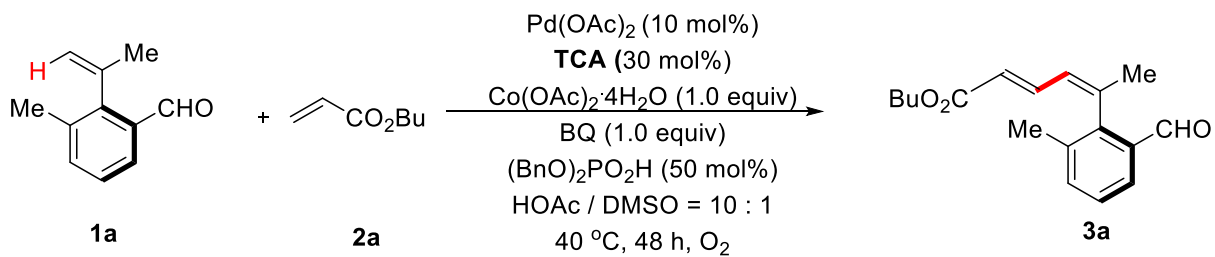

**TCAs:**

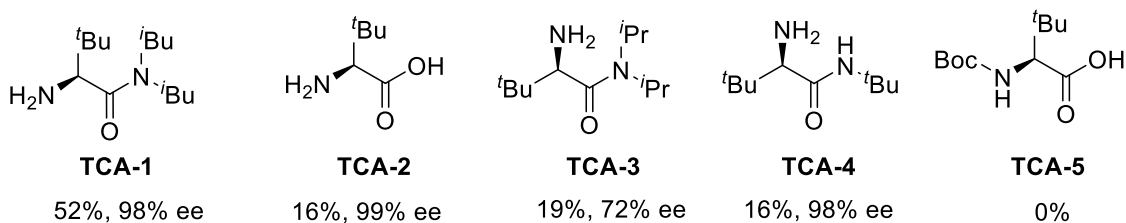

<sup>a</sup> Reactions conditions: **1a** (0.1 mmol), **2a** (0.4 mmol), Pd(OAc)<sub>2</sub> (10 mol %), **TCA** (30 mol%), Co(OAc)<sub>2</sub>·4H<sub>2</sub>O (1.0 equiv), BQ (1.0 equiv), (BnO)<sub>2</sub>PO<sub>2</sub>H (50 mol%) in HOAc/DMSO (10:1, v/v, 1.1 mL) under O<sub>2</sub> at 40 °C for 48 h. Isolated yields. The ee value was determined by HPLC.

**Table S2. Preliminary Screening of Additives <sup>a</sup>**

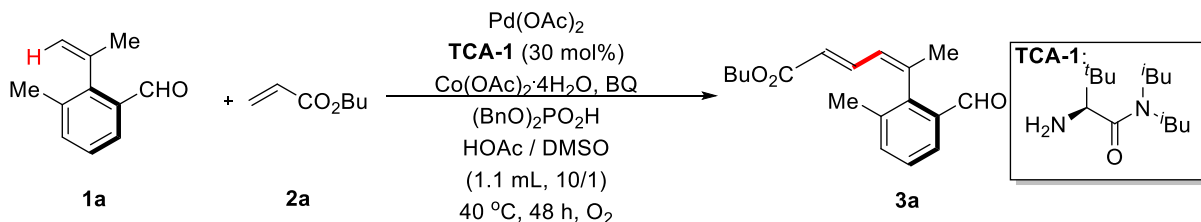

| entry | additive                                                                                      | yield (%) <sup>b</sup> | ee (%) <sup>c</sup> |
|-------|-----------------------------------------------------------------------------------------------|------------------------|---------------------|
| 1     | Co(OAc) <sub>2</sub> ·4H <sub>2</sub> O (0.5equiv)                                            | 42                     | 98                  |
| 2     | Co(OAc) <sub>2</sub> ·4H <sub>2</sub> O (1.5equiv)                                            | 33                     | 98                  |
| 3     | BQ (0.5equiv)                                                                                 | 33                     | 98                  |
| 4     | BQ (1.5equiv)                                                                                 | 29                     | 98                  |
| 5     | (BnO) <sub>2</sub> PO <sub>2</sub> H (25 mol%)                                                | 27                     | 98                  |
| 6     | (BnO) <sub>2</sub> PO <sub>2</sub> H (75 mol%)                                                | 34                     | 98                  |
| 7     | (BnO) <sub>2</sub> PO <sub>2</sub> H (100 mol%)                                               | 36                     | 98                  |
| 8     | <b>MnO<sub>2</sub> (1.5 equiv)</b><br>Instead of Co(OAc) <sub>2</sub> ·4H <sub>2</sub> O(1.0) | <b>82</b>              | <b>98</b>           |

equiv)

9

Pd(OAc)<sub>2</sub> (15 mol%)

80

98

<sup>a</sup> Reactions conditions: **1a** (0.1 mmol), **2a** (0.4 mmol), Pd(OAc)<sub>2</sub> (10 mol%), **TCA-1** (30 mol%), additives in HOAc/DMSO (10:1, v/v, 1.1 mL) under O<sub>2</sub> at 40 °C for 48 h. <sup>b</sup> Isolated yields. <sup>c</sup> The ee value was determined by HPLC.

**Table S3. Further Optimization of Reaction Conditions<sup>a</sup>**

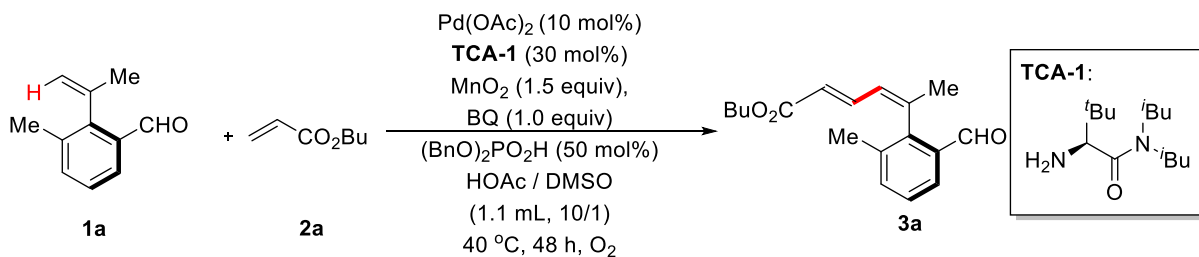

| entry | deviation from standard conditions                      | yield (%) <sup>b</sup> | ee (%) <sup>c</sup> |
|-------|---------------------------------------------------------|------------------------|---------------------|
| 1     | <b>none</b>                                             | <b>82</b>              | <b>98</b>           |
| 2     | MnO <sub>2</sub> (1.0 equiv)                            | 69                     | 98                  |
| 3     | MnO <sub>2</sub> (2.0 equiv)                            | 60                     | 98                  |
| 4     | 25 °C                                                   | 45                     | 98                  |
| 5     | 25 °C, 72 h                                             | 38                     | 97                  |
| 6     | (S)-diphenyl(pyrrolidin-2-yl)methanol as ligand         | 23                     | 13                  |
| 7     | Pd(OAc) <sub>2</sub> (5 mol%)<br><b>TCA-1</b> (15 mol%) | 48                     | 97                  |

<sup>a</sup> Reactions conditions: **1a** (0.1 mmol), **2a** (0.4 mmol), Pd(OAc)<sub>2</sub> (10 mol %), **TCA-1** (30 mol%), MnO<sub>2</sub> (1.5 equiv), BQ (1.0 equiv), (BnO)<sub>2</sub>PO<sub>2</sub>H (50 mol%) in HOAc/DMSO (v/v, 10:1, 1.1 mL) under O<sub>2</sub> at 40 °C for 48 h. <sup>b</sup> Isolated yields. <sup>c</sup> The ee value was determined by HPLC.

## 4. General Procedures D for the Cross-Couplings

### General Procedure for Atroposelective Cross-Coupling by β-C-H Alkenylation

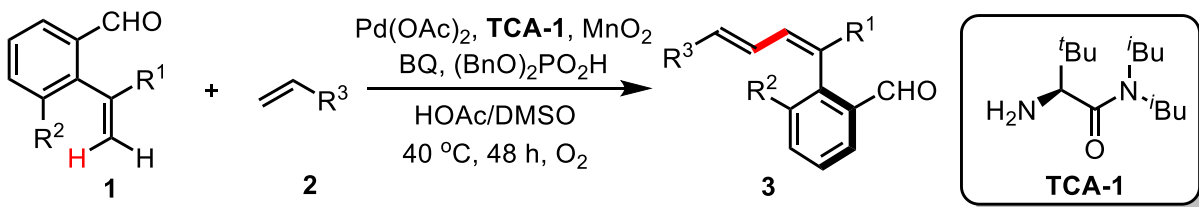

An screw-cap vial was charged with Pd(OAc)<sub>2</sub> (10 mol%, 0.01 mmol) , MnO<sub>2</sub> (1.5 equiv, 0.15 mmol), BQ (1.0 equiv, 0.1 mmol), (BnO)<sub>2</sub>PO<sub>2</sub>H (0.5 equiv, 0.05 mmol), HOAc (1.0 mL), DMSO (0.1 mL). Then, TCA-1 (30 mol%, 0.03 mmol), aldehyde **1** (1.0 equiv, 0.1 mmol) and olefin **2** (4.0 equiv, 0.4 mmol) were added into the solution in sequence. The vial was sealed under O<sub>2</sub> and heated to 40 °C with stirring for 48 h. After cooling down, the mixture was directly applied to a flash column chromatography (PE / EA).

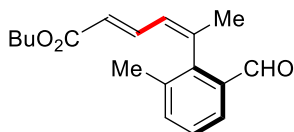

**Butyl (R)-(2E,4Z)-5-(2-formyl-6-methylphenyl)hexa-2,4-dienoate (3a)**

Following the General Procedures D, **3a** was obtained as a yellow oil (23.4 mg, 82% yield, 98% *ee*).

**<sup>1</sup>H NMR** (500 MHz, CDCl<sub>3</sub>)

δ 10.00 (s, 1H), 7.80 (d, *J* = 7.5 Hz, 1H), 7.49 (d, *J* = 7.5 Hz, 1H), 7.38 (t, *J* = 7.5 Hz, 1H), 6.71 (dd, *J* = 15.0, 11.5 Hz, 1H), 6.50 (d, *J* = 12.5 Hz, 1H), 5.87 (d, *J* = 15.0 Hz, 1H), 4.05 (t, *J* = 6.5 Hz, 2H), 2.22 (s, 3H), 2.17 (s, 3H), 1.58 – 1.53 (m, 2H), 1.35 – 1.28 (m, 2H), 0.88 (t, *J* = 7.5 Hz, 3H).

**<sup>13</sup>C NMR** (125 MHz, CDCl<sub>3</sub>)

δ 190.87, 165.95, 143.59, 142.02, 139.30, 135.06, 134.92, 132.05, 127.22, 126.96, 125.57, 120.52, 63.18, 29.60, 25.39, 18.09, 17.74, 12.66.

**HRMS (ESI)** for C<sub>18</sub>H<sub>23</sub>O<sub>3</sub> [M+ H]<sup>+</sup>: 287.1642, found: 287.1632.

**FTIR** (KBr, cm<sup>-1</sup>)

3444.17, 3417.83, 3383.41, 2923.36, 2354.21, 1731.78, 1681.31, 1653.27, 1633.64, 1538.32, 1400.93, 1022.43.

**Opt. Rot.** [α]<sup>20</sup><sub>D</sub> = - 20.7 (c = 0.4, CHCl<sub>3</sub>)

**HPLC** Daicel Chiralpak OD-H column, n-hexane/*i*-PrOH (60/40), 1.0 mL/min, 254 nm, 15.763 min (major enantiomer), 23.606 min (minor enantiomer).

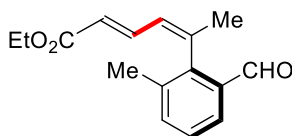

**Ethyl (R)-(2E,4Z)-5-(2-formyl-6-methylphenyl)hexa-2,4-dienoate (3b)**

Following the General Procedures D, **3b** was obtained as a brown oil (17.4 mg, 67% yield, 98% *ee*).

**<sup>1</sup>H NMR** (500 MHz, CDCl<sub>3</sub>)

δ 10.00 (s, 1H), 7.80 (d, *J* = 8.0 Hz, 1H), 7.49 (d, *J* = 8.0 Hz, 1H), 7.38 (t, *J* = 7.5 Hz, 1H), 6.71 (dd, *J* = 15.0, 11.5 Hz, 1H), 6.50 (d, *J* = 12.5 Hz, 1H), 5.87 (d, *J* = 15.0 Hz, 1H), 4.10 (q, *J* = 7.0 Hz, 2H), 2.22 (s, 3H), 2.17 (s, 3H), 1.21 (t, *J* = 7.0 Hz, 3H).

**<sup>13</sup>C NMR** (125 MHz, CDCl<sub>3</sub>)

δ 190.86, 165.86, 143.55, 142.01, 139.24, 135.52, 135.08, 132.04, 127.25, 126.97, 125.58, 120.59, 59.25, 25.42, 17.74, 13.19.

**HRMS (ESI)** for C<sub>16</sub>H<sub>19</sub>O<sub>3</sub> [M+ H]<sup>+</sup>: 259.1329, found: 259.1326.

**FTIR** (KBr, cm<sup>-1</sup>)

3473.40, 3441.43, 3422.79, 2957.01, 2923.36, 2853.27, 2354.21, 2331.78, 1681.31, 1653.27, 1636.45, 1398.13, 1028.04, 798.13, 669.16.

**Opt. Rot.** [α]<sup>20</sup><sub>D</sub> = - 30.7 (c = 0.4, CHCl<sub>3</sub>)

**HPLC** Daicel Chiralpak OD-H column, n-hexane/*i*-PrOH (60/40), 1.0 mL/min, 254 nm, 17.331 min (major enantiomer), 24.726 min (minor enantiomer).

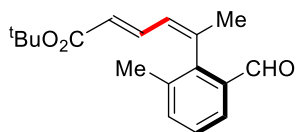

**Tert-Butyl (*R*)-(2*E*,4*Z*)-5-(2-formyl-6-methylphenyl)hexa-2,4-dienoate**  
**(3c)**

Following the General Procedures D, **3c** was obtained as a yellow oil (21.5 mg, 76% yield, 98% *ee*).

**<sup>1</sup>H NMR** (500 MHz, CDCl<sub>3</sub>)

δ 9.99 (s, 1H), 7.79 (d, *J* = 7.5 Hz, 1H), 7.47 (d, *J* = 7.5 Hz, 1H), 7.36 (t, *J* = 7.5 Hz, 1H), 6.65 (dd, *J* = 15.0, 11.5 Hz, 1H), 6.47 (d, *J* = 12.5 Hz, 1H), 5.81 (d, *J* = 15.0 Hz, 1H), 2.22 (s, 3H), 2.16 (s, 3H), 1.40 (s, 9H).

**<sup>13</sup>C NMR** (125 MHz, CDCl<sub>3</sub>)

δ 190.95, 165.28, 142.85, 142.19, 138.40, 135.04, 134.92, 132.03, 127.25, 126.89, 125.43, 122.38, 79.25, 27.07, 25.38, 17.74.

**HRMS (ESI)** for C<sub>18</sub>H<sub>23</sub>O<sub>3</sub> [M+ H]<sup>+</sup>: 287.1642, found: 287.1635.

**FTIR** (KBr, cm<sup>-1</sup>)

3444.95, 3416.76, 3405.25, 3384.98, 2968.22, 2923.36, 2359.81, 2334.58, 1684.11,  
1647.66, 1633.64, 1403.74, 1028.04, 803.74, 666.36.

**Opt. Rot.** [ $\alpha$ ]<sup>20</sup>D = - 14.0 (c = 0.4, CHCl<sub>3</sub>)

**HPLC** Daicel Chiralpak OD-H column, n-hexane/i-PrOH (98/2), 0.5 mL/min, 254 nm, 18.950  
min (major enantiomer), 21.680 min (minor enantiomer).

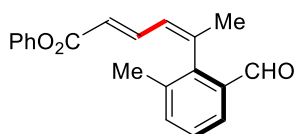

**Phenyl (R)-(2E,4Z)-5-(2-formyl-6-methylphenyl)hexa-2,4-dienoate (3d)**

Following the General Procedures D, **3d** was obtained as a yellow solid (21.5  
mg, 70% yield, 99% *ee*).

**<sup>1</sup>H NMR** (500 MHz, CDCl<sub>3</sub>)

$\delta$  10.02 (s, 1H), 7.50 (d, *J* = 7.5 Hz, 1H), 7.39 (t, *J* = 7.5 Hz, 1H), 7.33 (t, *J* = 7.0 Hz, 2H),  
7.19 (t, *J* = 7.5 Hz, 1H), 7.03 (d, *J* = 7.5 Hz, 2H), 6.88 (dd, *J* = 15.0, 11.5 Hz, 1H), 6.59  
(d, *J* = 12.0 Hz, 1H), 6.07 (d, *J* = 15.5 Hz, 1H), 2.25 (s, 3H), 2.21 (s, 3H).

**<sup>13</sup>C NMR** (125 MHz, CDCl<sub>3</sub>)

$\delta$  190.77, 164.22, 149.64, 145.25, 141.61, 141.16, 135.14, 134.86, 132.06, 128.26,  
127.11, 127.05, 125.96, 124.61, 120.51, 119.50, 25.45, 17.76.

**HRMS (ESI)** for C<sub>20</sub>H<sub>18</sub>O<sub>3</sub>Na [M+ Na]<sup>+</sup>: 329.1148, found: 329.1138.

**FTIR** (KBr, cm<sup>-1</sup>)

3441.51, 3417.85, 3384.07, 2959.81, 2920.56, 2847.66, 2357.01, 2337.38, 1678.50,  
1653.27, 1633.64, 1398.13, 1260.75, 1103.74, 1022.43, 803.74, 669.16.

**Opt. Rot.** [ $\alpha$ ]<sup>20</sup>D = - 25.4 (c = 0.4, CHCl<sub>3</sub>)

**HPLC** Daicel Chiralpak IB-H column, n-hexane/i-PrOH (95/5), 0.5 mL/min, 254 nm, 26.432  
min (major enantiomer), 28.410 min (minor enantiomer).

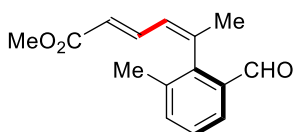

**Methyl (R)-(2E,4Z)-5-(2-formyl-6-methylphenyl)hexa-2,4-dienoate (3e)**

Following the General Procedures D, **3e** was obtained as a yellow solid



(21.5 mg, 76% yield, 98% *ee*, m.p. = 65.0 °C).

**<sup>1</sup>H NMR** (500 MHz, CDCl<sub>3</sub>)

δ 9.99 (s, 1H), 7.81 (d, *J* = 7.5 Hz, 1H), 7.49 (d, *J* = 7.5 Hz, 1H), 7.39 (t, *J* = 7.5 Hz, 1H), 6.71 (dd, *J* = 15.0, 11.5 Hz, 1H), 6.50 (d, *J* = 12.0 Hz, 1H), 5.87 (d, *J* = 15.5 Hz, 1H), 3.64 (s, 3H), 2.22 (s, 3H), 2.17 (s, 3H).

**<sup>13</sup>C NMR** (125 MHz, CDCl<sub>3</sub>)

δ 190.83, 166.23, 143.79, 141.95, 139.44, 135.10, 134.91, 132.04, 127.22, 127.00, 125.62, 120.14, 50.45, 25.41, 17.73.

**HRMS (ESI)** for C<sub>15</sub>H<sub>16</sub>O<sub>3</sub>Na [M+ Na]<sup>+</sup>: 267.0992, found: 267.0984.

**FTIR** (KBr, cm<sup>-1</sup>)

3441.07, 3417.58, 3405.21, 3384.21, 2957.01, 2920.56, 2351.40, 1647.66, 1633.64, 1400.93, 1384.11, 1022.43.

**Opt. Rot.** [α]<sup>20</sup><sub>D</sub> = - 2.7 (c = 0.4, CHCl<sub>3</sub>)

**HPLC** Daicel Chiralpak OD-H column, n-hexane/*i*-PrOH (60/40), 1.0 mL/min, 254 nm, 23.133 min (major enantiomer), 34.742 min (minor enantiomer).

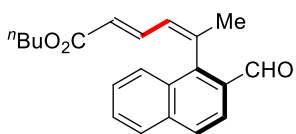

**butyl (*R*)-(2*E*,4*Z*)-5-(2-formylnaphthalen-1-yl)hexa-2,4-dienoate (3f)**

Following the general procedure D, **3f** was obtained as a reddish brown oil (27.5 mg, 85% yield, >99% *ee*).

**<sup>1</sup>H NMR** (500 MHz, CDCl<sub>3</sub>)

δ 10.21 (s, 1H), 8.01 (d, *J* = 8.5 Hz, 1H), 7.93 – 7.87 (m, 3H), 7.66 – 7.63 (m, 1H), 7.57 – 7.53 (m, 1H), 6.79 – 6.77 (m, 1H), 6.66 (dd, *J* = 15.0, 11.5 Hz, 1H), 5.91 (d, *J* = 15.0 Hz, 1H), 3.98 (t, *J* = 6.5 Hz, 2H), 2.35 (s, 3H), 1.53 – 1.47 (m, 2H), 1.24 – 1.21 (m, 2H), 0.82 (d, *J* = 7.5 Hz, 3H).

**<sup>13</sup>C NMR** (125 MHz, CDCl<sub>3</sub>)

δ 190.67, 165.68, 143.89, 141.58, 139.12, 135.43, 129.39, 129.28, 128.68, 128.14, 127.65, 127.64, 126.45, 125.25, 121.52, 121.26, 63.19, 29.54, 26.73, 18.03, 12.60.

**HRMS (ESI)** for C<sub>21</sub>H<sub>23</sub>O<sub>3</sub> [M+ H]<sup>+</sup>: 323.1642, found: 323.1649.

**FTIR** (KBr, cm<sup>-1</sup>)

3473.23, 3442.38, 3417.86, 3383.18, 2982.24, 2931.78, 2853.27, 1674.70, 1653.27,  
1630.84, 1605.61, 1532.71, 1504.67, 1409.35, 1386.92, 1266.36, 1106.54, 1025.23,  
798.13, 669.16.

**Opt. Rot.** [ $\alpha$ ]<sup>20</sup>D = 73.5 (c = 0.4, CHCl<sub>3</sub>)

**HPLC** Daicel Chiralpak OD-H column, n-hexane/i-PrOH (60/40), 1.0 mL/min, 254 nm, 7.371  
min (major enantiomer), 13.580 min (minor enantiomer).

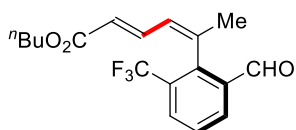

**Butyl (R)-(2E,4Z)-5-(2-formyl-6-(trifluoromethyl)phenyl)hexa-2,4-dienoate (3g)**

Following the general procedure D, **3g** was obtained as a yellow oil (23.8 mg, 70% yield, > 99% *ee*).

**<sup>1</sup>H NMR** (500 MHz, CDCl<sub>3</sub>)

$\delta$  9.99 (s, 1H), 8.11 (d, *J* = 7.5 Hz, 1H), 7.90 (d, *J* = 7.5 Hz, 1H), 7.56 (t, *J* = 7.5 Hz, 1H),  
6.59 (dd, *J* = 15.0, 11.5 Hz, 1H), 6.49 (d, *J* = 11.5 Hz, 1H), 5.82 (d, *J* = 15.0 Hz, 1H),  
4.00 – 3.95 (m, 2H), 2.18 (s, 3H), 1.50 – 1.46 (m, 2H), 1.28 – 1.21 (m, 2H), 0.81 (t, *J* =  
7.5 Hz, 3H).

**<sup>13</sup>C NMR** (125 MHz, CDCl<sub>3</sub>)

$\delta$  189.21, 165.65, 141.50 (d, *J*<sub>CF</sub> = 1.9 Hz), 141.48, 139.18, 138.77, 132.92, 130.80 (q,  
*J*<sub>CF</sub> = 5.1 Hz), 129.33 (d, *J*<sub>CF</sub> = 1.0 Hz), 128.44 (q, *J*<sub>CF</sub> = 30.3 Hz), 127.53, 122.38 (q,  
*J*<sub>CF</sub> = 272.6 Hz), 121.29, 63.27, 29.57, 26.52, 18.07, 12.65.

**<sup>19</sup>F NMR** (471 MHz, CDCl<sub>3</sub>)

$\delta$  -59.30.

**HRMS (ESI)** for C<sub>18</sub>H<sub>20</sub>O<sub>3</sub>F<sub>3</sub> [M+ H]<sup>+</sup>: 341.1359, found: 341.1356.

**FTIR** (KBr, cm<sup>-1</sup>)

3473.34, 3443.73, 3423.12, 2954.21, 2917.76, 2853.27, 2348.62, 2331.78, 1656.07,

1628.04, 1608.41, 1541.12, 1504.67, 1400.93, 1016.82, 669.16.

**Opt. Rot.**  $[\alpha]^{20}_D = -46.5$  ( $c = 2.0$ ,  $\text{CHCl}_3$ )

**HPLC** Daicel Chiralpak OD-H column, n-hexane/i-PrOH (60/40), 1.0 mL/min, 254 nm, 9.301 min (major enantiomer), 26.712 min (minor enantiomer).

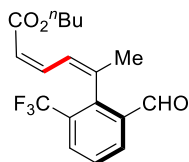

**Butyl (R)-(2Z,4Z)-5-(2-formyl-6-(trifluoromethyl)phenyl)hexa-2,4-dienoate (3g')**

Following the general procedure D, **3g'** was obtained as a light yellow oil (8.0 mg, 23% yield, >99% *ee*).

**<sup>1</sup>H NMR** (500 MHz,  $\text{CDCl}_3$ )

$\delta$  10.06 (s, 1H), 8.18 (d,  $J = 7.4$  Hz, 1H), 7.97 (d,  $J = 7.5$  Hz, 1H), 7.82 (d,  $J = 11.5$  Hz, 1H), 7.61 (t,  $J = 7.5$  Hz, 1H), 5.97 (t,  $J = 11.5$  Hz, 1H), 5.52 (d,  $J = 11.5$  Hz, 1H), 4.14 (t,  $J = 6.5$  Hz, 2H), 2.29 (s, 3H), 1.68 – 1.61 (m, 2H), 1.45 – 1.37 (m, 2H), 0.95 (t,  $J = 7.5$  Hz, 3H).

**<sup>13</sup>C NMR** (125 MHz,  $\text{CDCl}_3$ )

$\delta$  189.42, 165.23, 141.97 (q,  $J_{CF} = 1.6$  Hz), 139.30, 138.54, 133.09, 130.71 (q,  $J_{CF} = 5.0$  Hz), 130.13 (d,  $J_{CF} = 0.5$  Hz), 128.46 (q,  $J_{CF} = 30.4$  Hz), 127.61 (d,  $J_{CF} = 0.8$  Hz), 127.36, 122.36 (q,  $J_{CF} = 272.6$  Hz), 117.45, 63.08, 29.67, 26.66, 18.18, 12.70.

**<sup>19</sup>F NMR** (471 MHz,  $\text{CDCl}_3$ )

$\delta$  -59.44.

**HRMS (ESI)** for  $\text{C}_{18}\text{H}_{20}\text{O}_3\text{F}_3$   $[\text{M} + \text{H}]^+$ : 341.1359, found: 341.1369.

**FTIR** (KBr,  $\text{cm}^{-1}$ )

3473.29, 3441.49, 3417.39, 3385.39, 2957.01, 2926.17, 2357.01, 2337.38, 1650.47, 1630.84, 1541.12, 1507.48, 1457.01, 1400.93, 1386.92, 1016.82.

**Opt. Rot.**  $[\alpha]^{20}_D = 49.2$  ( $c = 0.4$ ,  $\text{CHCl}_3$ )

**HPLC** Daicel Chiralpak OD-H column, n-hexane/i-PrOH (92/8), 1.0 mL/min, 254 nm, 6.403 min (major enantiomer), 4.757 min (minor enantiomer).

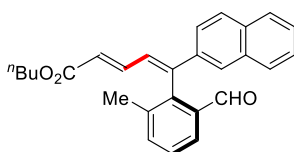

**Butyl (R)-(2E,4Z)-5-(2-formyl-6-methylphenyl)-5-(naphthalen-2-yl)penta-2,4-dienoate (3h)**

Following the general procedure D, **3h** was obtained as a yellow oil (28.2 mg, 71% yield, >99% *ee*).

**<sup>1</sup>H NMR** (500 MHz, CDCl<sub>3</sub>)

δ 9.92 (s, 1H), 7.95 (d, *J* = 7.5 Hz, 1H), 7.84 (d, *J* = 9.0 Hz, 1H), 7.81 (d, *J* = 8.0 Hz, 1H), 7.69 – 7.66 (m, 2H), 7.59 (d, *J* = 7.5 Hz, 1H), 7.52 (t, *J* = 7.5 Hz, 1H), 7.49 – 7.46 (m, 1H), 7.45 – 7.42 (m, 1H), 7.41 (d, *J* = 1.0 Hz, 1H), 7.33 (d, *J* = 10.5 Hz, 1H), 6.89 (dd, *J* = 15.0, 11.5 Hz, 1H), 6.13 (d, *J* = 15.0 Hz, 1H), 4.09 (d, *J* = 13.0 Hz, 2H), 2.14 (s, 3H), 1.60 – 1.57 (m, 2H), 1.37 – 1.30 (m, 2H), 0.90 (t, *J* = 7.5 Hz, 3H).

**<sup>13</sup>C NMR** (125 MHz, CDCl<sub>3</sub>)

δ 191.04, 165.65, 143.63, 139.80, 139.36, 136.76, 135.21, 135.15, 133.68, 132.47, 132.27, 127.76, 127.65, 127.58, 126.56, 126.32, 126.27, 126.01, 125.64, 124.74, 122.90, 122.01, 63.31, 29.61, 18.18, 18.11, 12.68.

**HRMS (ESI)** for C<sub>27</sub>H<sub>26</sub>O<sub>3</sub>Na [M+ Na]<sup>+</sup>: 421.1774, found: 421.1766.

**FTIR** (KBr, cm<sup>-1</sup>)

3456.07, 3414.02, 3385.98, 3231.78, 2957.01, 2357.01, 1684.11, 1656.07, 1633.64, 1560.75, 1541.12, 1510.28, 1406.54, 1395.33, 1030.84, 666.36.

**Opt. Rot.** [α]<sup>20</sup><sub>D</sub> = - 4.9 (c = 0.4, CHCl<sub>3</sub>)

**HPLC** Daicel Chiralpak OD-H column, n-hexane/*i*-PrOH (85/15), 1.0 mL/min, 254 nm, 11.377 min (major enantiomer), 6.578 min (minor enantiomer).

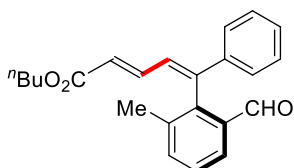

**Butyl (R)-(2E,4Z)-5-(2-formyl-6-methylphenyl)-5-phenylpenta-2,4-dienoate (3i)**

Following the general procedure D, **3i** was obtained as a yellow oil (30.8 mg, 89% yield, 99% *ee*).

**<sup>1</sup>H NMR** (500 MHz, CDCl<sub>3</sub>)

δ 9.89 (s, 1H), 7.91 (d, *J* = 7.5 Hz, 1H), 7.55 (d, *J* = 7.5 Hz, 1H), 7.47 (t, *J* = 7.5 Hz, 1H), 7.34 – 7.31 (m, 3H), 7.29 – 7.26 (m, 2H), 7.19 (d, *J* = 11.5 Hz, 1H), 6.86 (dd, *J* = 15.0, 11.5 Hz, 1H), 6.08 (d, *J* = 15.0 Hz, 1H), 4.07 (t, *J* = 6.5 Hz, 2H), 2.12 (s, 3H), 1.58 (p, *J* = 7.0 Hz, 2H), 1.37 – 1.29 (m, 2H), 0.90 (t, *J* = 7.5 Hz, 3H).

**<sup>13</sup>C NMR** (125 MHz, CDCl<sub>3</sub>)

δ 191.03, 165.64, 143.74, 139.79, 139.32, 137.80, 136.65, 135.13, 133.56, 128.19, 127.94, 127.56, 125.89, 125.53, 124.68, 122.86, 63.30, 29.60, 18.17, 18.10, 12.68.

**HRMS (ESI)** for C<sub>23</sub>H<sub>25</sub>O<sub>3</sub> [M+ H]<sup>+</sup>: 349.1798, found: 349.1801.

**FTIR** (KBr, cm<sup>-1</sup>)

3473.04, 3441.86, 3416.71, 3395.58, 3385.80, 2957.01, 2354.21, 1653.27, 1636.45, 1614.02, 1541.12, 1504.67, 1406.54, 1019.63.

**Opt. Rot.** [α]<sup>20</sup><sub>D</sub> = - 18.1 (c = 0.8, CHCl<sub>3</sub>)

**HPLC** Daicel Chiralpak OD-H column, n-hexane/i-PrOH (95/5), 0.5 mL/min, 254 nm, 19.882 min (major enantiomer), 18.111 min (minor enantiomer).

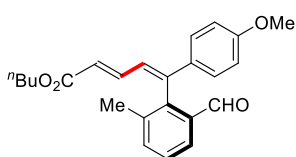

**Butyl (*R*)-(2*E*,4*Z*)-5-(2-formyl-6-methylphenyl)-5-(4-methoxyphenyl)penta-2,4-dienoate (**3j**)**

Following the general procedure D, **3j** was obtained as a yellow oil (29.6 mg, 78% yield, 98% *ee*).

**<sup>1</sup>H NMR** (500 MHz, CDCl<sub>3</sub>)

δ 9.87 (s, 1H), 7.90 (d, *J* = 7.5 Hz, 1H), 7.55 (d, *J* = 7.5 Hz, 1H), 7.46 (t, *J* = 7.5 Hz, 1H), 7.21 (d, *J* = 9.0 Hz, 2H), 7.10 (d, *J* = 11.5 Hz, 1H), 6.86 – 6.80 (m, 3H), 6.03 (d, *J* = 15.0 Hz, 1H), 4.06 (t, *J* = 6.5 Hz, 2H), 3.80 (s, 3H), 2.11 (s, 3H), 1.59 – 1.56 (m, 2H), 1.36 – 1.30 (m, 2H), 0.89 (t, *J* = 7.4 Hz, 3H).

**<sup>13</sup>C NMR** (125 MHz, CDCl<sub>3</sub>)

$\delta$  191.18, 165.82, 159.49, 143.28, 140.11, 139.70, 136.59, 135.08, 133.53, 130.44, 127.46, 127.00, 124.46, 123.93, 121.71, 113.36, 63.21, 54.34, 29.62, 28.68, 18.08, 12.68.

**HRMS (ESI)** for  $C_{24}H_{27}O_4$   $[M+H]^+$ : 379.1904, found: 379.1911.

**FTIR** (KBr,  $cm^{-1}$ )

3444.52, 3422.80, 3404.70, 3383.99, 2965.42, 2923.36, 2853.27, 2354.21, 2328.97, 1670.09, 1653.27, 1630.84, 1400.93, 1384.11, 1263.55, 1100.93, 1028.04, 800.93, 666.36.

**Opt. Rot.**  $[\alpha]^{20}_D = -12.4$  ( $c = 0.4$ ,  $CHCl_3$ )

**HPLC** Daicel Chiralpak OD-H column, n-hexane/i-PrOH (80/20), 1.0 mL/min, 254 nm, 7.150 min (major enantiomer), 5.690 min (minor enantiomer).

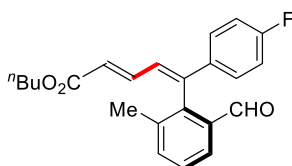

**Butyl (R)-(2E,4Z)-5-(4-fluorophenyl)-5-(2-formyl-6-methylphenyl)penta-2,4-dienoate (3k)**

Following the general procedure D, **3k** was obtained as a white oil (30.6 mg, 84% yield, > 99% *ee*).

**<sup>1</sup>H NMR** (500 MHz,  $CDCl_3$ )

$\delta$  9.88 (s, 1H), 7.90 (d,  $J = 8.0$  Hz, 1H), 7.56 (d,  $J = 7.5$  Hz, 1H), 7.49 (t,  $J = 7.5$  Hz, 1H), 7.27 (d,  $J = 3.5$  Hz, 1H), 7.25 (d,  $J = 5.5$  Hz, 1H), 7.11 (d,  $J = 11.5$  Hz, 1H), 7.02 (t,  $J = 8.5$  Hz, 2H), 6.85 – 6.80 (m, 1H), 6.08 (d,  $J = 15.0$  Hz, 1H), 4.07 (t,  $J = 6.5$  Hz, 2H), 2.11 (s, 3H), 1.61 – 1.55 (m, 2H), 1.33 – 1.29 (m, 2H), 0.90 (t,  $J = 7.5$  Hz, 3H).

**<sup>13</sup>C NMR** (125 MHz,  $CDCl_3$ )

$\delta$  190.82, 165.60, 162.17 (d,  $J_{CF} = 249.3$  Hz), 142.63, 139.37, 139.18, 136.59, 135.23, 134.02 (d,  $J_{CF} = 3.4$  Hz), 133.49, 127.72, 127.34 (d,  $J_{CF} = 9.4$  Hz), 125.57 (d,  $J_{CF} = 1.8$  Hz), 125.09, 122.90, 114.64 (d,  $J_{CF} = 21.6$  Hz), 76.20, 63.33, 29.59, 18.12, 18.10, 12.67.

**<sup>19</sup>F NMR** (471 MHz,  $CDCl_3$ )

$\delta$ -111.51

**HRMS (ESI)** for  $C_{24}H_{24}O_3F$   $[M+H]^+$ : 367.1665, found: 367.1668.

**FTIR** (KBr,  $cm^{-1}$ )

3445.33, 3422.81, 3383.81, 2959.81, 2920.56, 2842.0, 2357.01, 2326.17, 1675.70,  
1647.66, 1560.75, 1535.51, 1504.67, 1395.33, 1384.11, 1260.75, 1103.74, 1025.23,  
795.33, 666.36.

**Opt. Rot.**  $[\alpha]^{20}_D = -19.3$  ( $c = 0.8$ ,  $CHCl_3$ )

**HPLC** Daicel Chiralpak AD-H column, n-hexane/*i*-PrOH (95/5), 0.5 mL/min, 254 nm, 19.725  
min (major enantiomer), 21.934 min (minor enantiomer).

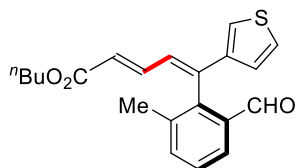

**Butyl (R)-(2E,4E)-5-(2-formyl-6-methylphenyl)-5-(thiophen-3-yl)penta-2,4-dienoate (3I)**

Following the general procedure D, **3I** was obtained as a yellow oil (29.3 mg, 83% yield, >99% *ee*).

**<sup>1</sup>H NMR** (500 MHz,  $CDCl_3$ )

$\delta$  9.88 (s, 1H), 7.90 (d,  $J = 8.0$  Hz, 1H), 7.55 (d,  $J = 7.5$  Hz, 1H), 7.47 (t,  $J = 7.5$  Hz, 1H),  
7.36 (d,  $J = 2.0$  Hz, 2H), 7.08 (d,  $J = 11.5$  Hz, 1H), 6.87 – 6.79 (m, 1H), 6.74 (t,  $J = 2.0$   
Hz, 1H), 6.05 (d,  $J = 15.0$  Hz, 1H), 4.07 (t,  $J = 6.5$  Hz, 2H), 2.15 (s, 3H), 1.60 – 1.55 (m,  
2H), 1.36 – 1.29 (m, 2H), 0.89 (t,  $J = 7.5$  Hz, 3H).

**<sup>13</sup>C NMR** (125 MHz,  $CDCl_3$ )

$\delta$  191.03, 165.66, 141.04, 139.84, 139.27, 138.75, 136.40, 135.10, 133.25, 127.57,  
126.09, 124.98, 124.74, 124.38, 123.33, 122.25, 63.27, 29.60, 18.10, 17.98, 12.67.

**HRMS (ESI)** for  $C_{21}H_{22}O_3SNa$   $[M+Na]^+$ : 377.1182, found: 377.1172.

**FTIR** (KBr,  $cm^{-1}$ )

3565.42, 2351.40, 1681.31, 1650.47, 1636.45, 1560.75, 1541.12, 1504.67, 666.36.

**Opt. Rot.**  $[\alpha]^{20}_D = -7.7$  ( $c = 0.4$ ,  $CHCl_3$ )

**HPLC** Daicel Chiralpak IA-H column, n-hexane/*i*-PrOH (98/2), 1.0 mL/min, 254 nm, 15.699

min (major enantiomer), 13.717 min (minor enantiomer).

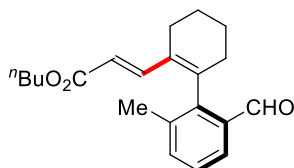

**Butyl (R)-(E)-3-(2'-formyl-6'-methyl-3,4,5,6-tetrahydro-[1,1'-biphenyl]-2-yl)acrylate (3m)**

Following the general procedure D, **3m** was obtained as a colorless oil (28.9 mg, 89% yield, >99% *ee*).

**<sup>1</sup>H NMR** (500 MHz, CDCl<sub>3</sub>)

δ 9.98 (s, 1H), 7.79 (d, *J* = 7.5 Hz, 1H), 7.46 (d, *J* = 7.5 Hz, 1H), 7.35 (t, *J* = 7.5 Hz, 1H), 6.91 (d, *J* = 15.5 Hz, 1H), 5.86 (d, *J* = 15.5 Hz, 1H), 4.05 – 4.00 (m, 2H), 2.38 – 2.35 (m, 3H), 2.30 – 2.25 (m, 1H), 2.18 (s, 3H), 1.88 – 1.76 (m, 4H), 1.56 – 1.51 (m, 2H), 1.31 – 1.26 (m, 2H), 0.87 (t, *J* = 7.5 Hz, 3H).

**<sup>13</sup>C NMR** (125 MHz, CDCl<sub>3</sub>)

δ 191.08, 166.21, 143.72, 141.80, 141.62, 135.25, 134.95, 132.31, 131.37, 126.67, 125.15, 116.02, 63.04, 33.06, 29.59, 23.80, 21.46, 21.21, 18.10, 17.74, 12.66.

**HRMS (ESI)** for C<sub>21</sub>H<sub>27</sub>O<sub>3</sub> [M+ H]<sup>+</sup>: 327.1955, found: 327.1947.

**FTIR** (KBr, cm<sup>-1</sup>)

3441.17, 3417.14, 3404.98, 3383.83, 2965.42, 2931.78, 2354.21, 2340.19, 1647.66, 1633.64, 1398.13, 1392.52, 1260.75, 1028.04, 812.15, 669.16.

**Opt. Rot.** [α]<sup>20</sup><sub>D</sub> = - 6.9 (c = 0.4, CHCl<sub>3</sub>)

**HPLC** Daicel Chiralpak OD-H column, n-hexane/*i*-PrOH (97/3), 1.0 mL/min, 254 nm, 13.743 min (major enantiomer), 15.202 min (minor enantiomer).

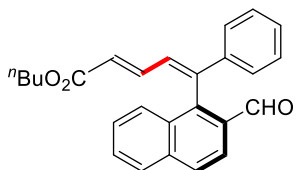

**Butyl (R)-(2E,4Z)-5-(2-formylnaphthalen-1-yl)-5-phenylpenta-2,4-dienoate (3n)**

Following the general procedure D, **3n** was obtained as a yellow oil (28.9 mg, 75% yield, 99% *ee*).

**<sup>1</sup>H NMR** (500 MHz, CDCl<sub>3</sub>)



$\delta$  10.12 (s, 1H), 8.10 (d,  $J = 8.5$  Hz, 1H), 8.00 (d,  $J = 8.5$  Hz, 1H), 7.94 (d,  $J = 8.0$  Hz, 1H), 7.82 (d,  $J = 8.5$  Hz, 1H), 7.61 (d,  $J = 16.0$  Hz, 1H), 7.47 – 7.44 (m, 1H), 7.42 (d,  $J = 11.5$  Hz, 1H), 7.32 – 7.28 (m, 5H), 6.78 – 6.73 (m, 1H), 6.10 (d,  $J = 15.0$  Hz, 1H), 4.00 (t,  $J = 6.5$  Hz, 2H), 1.54 – 1.48 (m, 2H), 1.25 (dd,  $J = 7.5, 1.5$  Hz, 2H), 0.84 (t,  $J = 7.5$  Hz, 3H).

**<sup>13</sup>C NMR** (125 MHz, CDCl<sub>3</sub>)

$\delta$  191.00, 165.42, 142.26, 141.06, 139.27, 138.63, 135.51, 135.42, 130.77, 130.50, 128.26, 128.18, 127.97, 127.74, 127.53, 126.59, 125.95, 125.62, 123.34, 121.31, 63.28, 29.51, 18.03, 12.62.

**HRMS (ESI)** for C<sub>26</sub>H<sub>25</sub>O<sub>3</sub> [M+ H]<sup>+</sup>: 385.1798, found: 385.1789.

**FTIR** (KBr, cm<sup>-1</sup>)

3451.97, 3417.41, 3383.93, 2959.81, 2926.17, 2354.21, 2326.17, 1681.31, 1653.27, 1630.84, 1405.54, 1386.92, 1269.16, 1030.84, 809.35, 666.36.

**Opt. Rot.** [ $\alpha$ ]<sup>20</sup><sub>D</sub> = 83.7 (c = 0.8, CHCl<sub>3</sub>)

**HPLC** Daicel Chiralpak IB-H column, n-hexane/i-PrOH (98/2), 0.5 mL/min, 254 nm, 25.445 min (major enantiomer), 24.646 min (minor enantiomer).

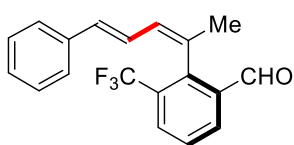

**(R)-2-((2Z,4E)-5-phenylpenta-2,4-dien-2-yl)-3-(trifluoromethyl)benzaldehyde (30)**

Following the general procedure D, **30** was obtained as a yellow oil (25.9 mg, 82% yield, 95% *ee*).

**<sup>1</sup>H NMR** (500 MHz, CDCl<sub>3</sub>)

$\delta$  10.13 (s, 1H), 8.20 (d,  $J = 7.5$  Hz, 1H), 8.00 (d,  $J = 8.0$  Hz, 1H), 7.62 (t,  $J = 8.0$  Hz, 1H), 7.23 – 7.22 (m, 2H), 7.17 – 7.14 (m, 3H), 6.60 (d,  $J = 11.0$  Hz, 1H), 6.56 (d,  $J = 15.5$  Hz, 1H), 6.09 (dd,  $J = 15.5, 11.0$  Hz, 1H), 2.23 (s, 3H).

**<sup>13</sup>C NMR** (125 MHz, CDCl<sub>3</sub>)

$\delta$  190.16, 135.88, 133.28, 132.46, 131.68, 131.68, 130.79 (q,  $J_{CF} = 5.3$  Hz), 130.00, 129.96, 127.42 (q,  $J_{CF} = 16.8$  Hz), 127.46, 127.00, 126.71, 124.32 (q,  $J_{CF} = 288.0$  Hz), 125.43, 124.02, 26.23.

**$^{19}\text{F}$  NMR** (471 MHz,  $\text{CDCl}_3$ )

$\delta$  -59.60.

**HRMS (ESI)** for  $\text{C}_{19}\text{H}_{16}\text{O}_3\text{F}_3$   $[\text{M} + \text{H}]^+$ : 317.1148, found: 317.1144.

**FTIR** (KBr,  $\text{cm}^{-1}$ )

3441.47, 3422.54, 3383.74, 2962.62, 2923.36, 2354.21, 1681.31, 1650.47, 1543.93, 1403.74, 1381.31, 1260.75, 1028.04, 795.33.

**Opt. Rot.**  $[\alpha]^{20}\text{D} = -75.9$  ( $c = 2$ ,  $\text{CHCl}_3$ )

**HPLC** Daicel Chiralpak OD-H column, n-hexane/*i*-PrOH (98/2), 0.5 mL/min, 254 nm, 11.147 min (major enantiomer), 12.985 min (minor enantiomer).

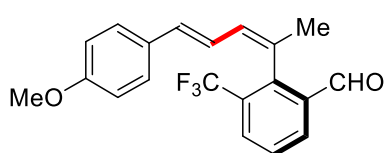

**(R)-2-((2Z,4E)-5-(4-methoxyphenyl)penta-2,4-dien-2-yl)-3-(trifluoromethyl)benzaldehyde (3p)**

Following the general procedure D, **3p** was obtained as an orange yellow oil (27.2 mg, 79% yield, > 99% *ee*).

**$^1\text{H}$  NMR** (500 MHz,  $\text{CDCl}_3$ )

$\delta$  10.12 (s, 1H), 8.19 (d,  $J = 8.0$  Hz, 1H), 7.99 (d,  $J = 7.5$  Hz, 1H), 7.60 (t,  $J = 7.5$  Hz, 1H), 7.10 (d,  $J = 8.5$  Hz, 2H), 6.75 (d,  $J = 8.5$  Hz, 2H), 6.56 (d,  $J = 11.0$  Hz, 1H), 6.50 (d,  $J = 15.5$  Hz, 1H), 5.96 (dd,  $J = 15.5, 11.0$  Hz, 1H), 3.75 (s, 3H), 2.21 (s, 3H).

**$^{13}\text{C}$  NMR** (125 MHz,  $\text{CDCl}_3$ )

$\delta$  190.32, 158.33, 143.52 (d,  $J_{CF} = 1.9$  Hz), 133.33, 132.01, 131.86 (d,  $J_{CF} = 0.9$  Hz), 130.77 (q,  $J_{CF} = 4.3$  Hz), 129.98, 128.89 (q,  $J_{CF} = 30.3$  Hz), 128.73, 128.62, 126.90, 126.68, 122.56 (q,  $J_{CF} = 272.6$  Hz), 122.09, 112.93, 54.23, 26.17.

**$^{19}\text{F}$  NMR** (471 MHz,  $\text{CDCl}_3$ )

$\delta$  -59.64.

**HRMS (ESI)** for C<sub>20</sub>H<sub>17</sub>O<sub>2</sub>F<sub>3</sub>Na [M+ Na]<sup>+</sup>: 369.1073, found: 369.1072.

**FTIR** (KBr, cm<sup>-1</sup>)

3447.66, 3419.63, 3385.98, 2351.40, 2328.97, 1684.11, 1656.07, 1533.64, 1510.28,  
1406.54, 1384.11, 1025.23, 671.96.

**Opt. Rot.** [α]<sup>20</sup><sub>D</sub> = -123.7 (c = 0.4, CHCl<sub>3</sub>)

**HPLC** Daicel Chiralpak OD-H column, n-hexane/*i*-PrOH (95/5), 1.0 mL/min, 254 nm, 6.247  
min (major enantiomer), 9.032 min (minor enantiomer).

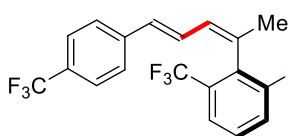

**(R)-3-(Trifluoromethyl)-2-((2Z,4E)-5-(4-(trifluoromethyl)phenyl)pen-  
ta-2,4-dien-2-yl)benzaldehyde (3q)**

Following the general procedure D, **3q** was obtained as an orange yellow  
oil (29.2 mg, 76% yield, >99% *ee*).

**<sup>1</sup>H NMR** (500 MHz, CDCl<sub>3</sub>)

δ 10.12 (s, 1H), 8.21 (d, *J* = 7.5 Hz, 1H), 8.01 (d, *J* = 8.0 Hz, 1H), 7.64 (t, *J* = 8.0 Hz,  
1H), 7.45 (d, *J* = 8.5 Hz, 2H), 7.24 (d, *J* = 8.0 Hz, 2H), 6.61 (d, *J* = 11.0 Hz, 1H), 6.57 (d,  
*J* = 15.5 Hz, 1H), 6.16 (dd, *J* = 15.5, 11.0 Hz, 1H), 2.25 (s, 3H).

**<sup>13</sup>C NMR** (125 MHz, CDCl<sub>3</sub>)

δ 189.86, 142.74 (d, *J*<sub>CF</sub> = 1.8 Hz), 139.32 (q, *J*<sub>CF</sub> = 1.3 Hz), 133.23, 132.16, 131.18,  
130.83 (q, *J*<sub>CF</sub> = 5.3 Hz), 130.78, 130.23, 128.74 (q, *J*<sub>CF</sub> = 30.3 Hz), 128.33 (q, *J*<sub>CF</sub> =  
22.6 Hz), 127.21, 126.94 (d, *J*<sub>CF</sub> = 7.9 Hz), 126.29, 125.50, 124.40 (q, *J*<sub>CF</sub> = 3.8 Hz),  
124.22 (q, *J*<sub>CF</sub> = 3.8 Hz), 123.05 (q, *J*<sub>CF</sub> = 270.1 Hz), 122.51 (q, *J*<sub>CF</sub> = 272.5 Hz),  
26.32.

**<sup>19</sup>F NMR** (471 MHz, CDCl<sub>3</sub>)

δ -59.55, -62.61.

**HRMS (ESI)** for C<sub>20</sub>H<sub>15</sub>OF<sub>6</sub> [M+ H]<sup>+</sup>: 385.0982, found: 385.0972.

**FTIR** (KBr, cm<sup>-1</sup>)

3447.56, 3429.32, 3377.68, 2323.40, 2320.07, 1683.21, 1646.08, 1555.54, 1510.38,

1406.67, 1382.01, 1035.25, 666.96.

**Opt. Rot.**  $[\alpha]^{20}_D = 108.7$  ( $c = 0.4$ ,  $\text{CHCl}_3$ )

**HPLC** Daicel Chiralpak AD-H column, n-hexane/i-PrOH (99.2/0.8), 1.0 mL/min, 254 nm, 6.952 min (major enantiomer), 8.784 min (minor enantiomer).

## 5. Gram-Scaled Synthesis

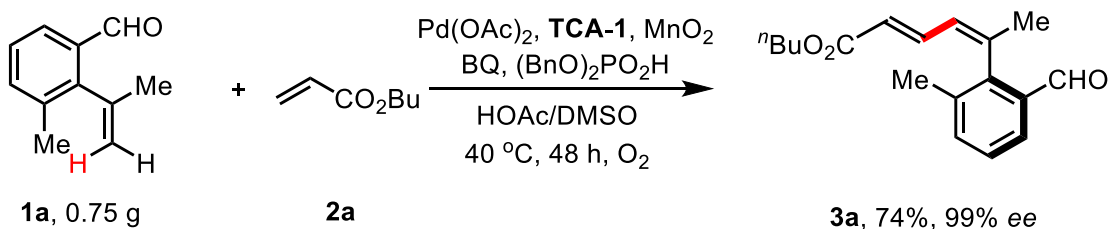

An screw-cap vial was charged with  $\text{Pd}(\text{OAc})_2$  (10 mol%, 0.47 mmol),  $\text{MnO}_2$  (1.5 equiv, 7.05 mmol), BQ (1.0 equiv, 4.7 mmol),  $(\text{BnO})_2\text{PO}_2\text{H}$  (0.5 equiv, 2.35 mmol), HOAc (47 mL), DMSO (4.7 mL). Then, **TCA-1** (30 mol%, 1.41 mmol), aldehyde **1a** (1.0 equiv, 4.7 mmol, 0.75g) and acrylate **2a** (4.0 equiv, 18.8 mmol) were added into the solution in sequence. The vial was sealed under  $\text{O}_2$  and heated to 40 °C with stirring for 48 h. After cooling down, the mixture was directly applied to a flash column chromatography (PE / EA). Product **3a** was obtained as a yellow oil (1.0 g, 74% yield, 99% *ee*).

## 6. Further Elaboration

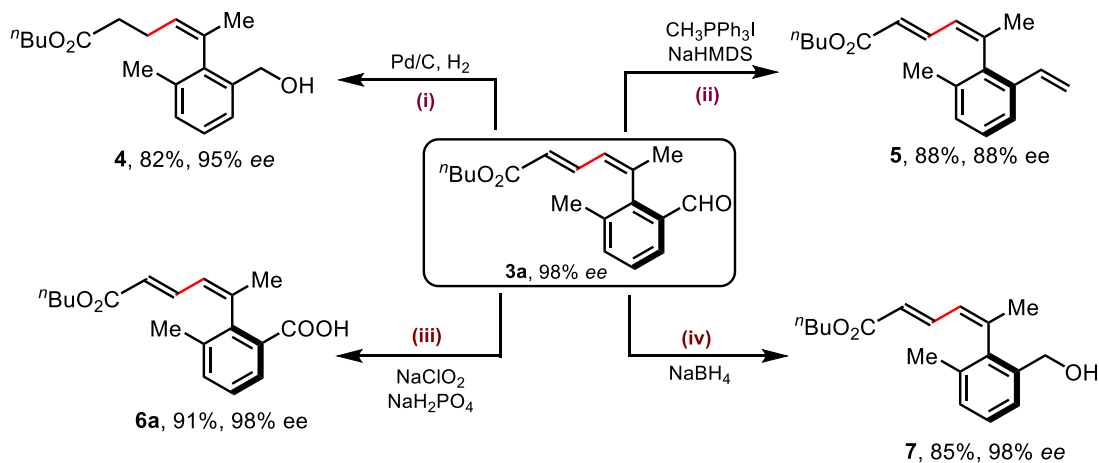

**Hydrogenation Reaction (i):** A solution of aldehyde (**3a**) (0.2 mmol, 1.0 equiv) in EtOAc (2 mL) was vacuum purged three times, backfilling with Ar. Pd/C (5% on carbon (wetted with cal. 55% water), 10 wt%) was added and the solution was vacuum purged once more, backfilling with H<sub>2</sub>. The solution was allowed to stir at room temperature for 4 h until reaction completion (monitored by TLC). The reaction was vacuum purged and backfilled with N<sub>2</sub>, upon which the reaction was filtered through Celite, rinsing with EtOAc (10 mL). The organic solution was concentrated in vacuo to give an orange oil, which was dissolved in 10 mL EtOAc. The organic solution was washed with HCl (2 M, 10 mL × 2), water (10 mL), and brine (10 mL). The organic layer was then dried with Na<sub>2</sub>SO<sub>4</sub> and concentrated in vacuo to afford the crude olefin. Purification by column chromatography (PE/EA) afforded styrene (**4**).

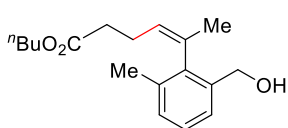

**Butyl 5-(2-(hydroxymethyl)-6-methylphenyl)-4-ene-hexanoate (**4**)**

Following the procedure, **4** was obtained as a colorless oil (48.0 mg, 8.2% yield, 95% *ee*).

**<sup>1</sup>H NMR** (500 MHz, CDCl<sub>3</sub>)

δ 7.33 (d, *J* = 7.5 Hz, 1H), 7.20 (d, *J* = 15.0 Hz, 1H), 7.14 (d, *J* = 7.5 Hz, 1H), 5.52 (t, *J* = 6.5 Hz, 1H), 4.56 (q, *J* = 7.5 Hz, 2H), 4.05 – 4.03 (m, 2H), 2.31 – 2.27 (m, 2H), 2.19 (s, 3H), 2.02 – 1.94 (m, 2H), 1.91 (s, 3H), 1.61 – 1.55 (m, 4H), 1.37 – 1.31 (m, 3H), 0.92 (t, *J* = 7.5 Hz, 3H).

**<sup>13</sup>C NMR** (125 MHz, CDCl<sub>3</sub>)

δ 172.50, 138.45, 136.79, 134.66, 133.95, 128.22, 126.02, 125.69, 124.58, 63.37, 62.05, 32.54, 29.60, 23.59, 23.42, 18.12, 18.09, 12.68.

**HRMS (ESI)** for C<sub>18</sub>H<sub>28</sub>O<sub>3</sub>Na [M+ Na]<sup>+</sup>: 315.1931, found: 315.1928.

**FTIR** (KBr, cm<sup>-1</sup>)

3383.18, 2348.60, 1656.07, 1636.45, 1560.7, 1538.32, 1507.48, 1403.74, 1016.82.

**Opt. Rot.** [α]<sup>20</sup><sub>D</sub> = 1.9 (c = 0.4, CHCl<sub>3</sub>)

**HPLC** Daicel Chiralpak OD-H column, n-hexane/*i*-PrOH (97/3), 1.0 mL/min, 210 nm, 9.896 min (major enantiomer), 11.192 min (minor enantiomer).

**Wittig olefination (ii):** Methyl triphenylphosphonium bromide (0.2 mmol, 1.1 equiv) was suspended in THF (0.5 M) and cooled to 0 °C. A solution of NaHMDS (1.3 equiv, 0.26 mmol) in THF (2.0 M) was added dropwise. The mixture was stirred for 1 h until an orange suspension formed. The mixture was then further cooled to – 78 °C, and the aldehyde **3a** (1.0 equiv, 0.2 mmol) was added over 20 min. After addition was completed, the reaction was gradually warmed to room temperature and stirred overnight. The reaction was quenched with sat. NH<sub>4</sub>Cl (aq.) solution, then extracted with EA. The combined organic layers were washed with brine and dried over anhydrous Na<sub>2</sub>SO<sub>4</sub>. The solvent was removed in vacuo, and the resulting residue was purified using silica gel column chromatography (PE / EA) afforded ester (**5**).

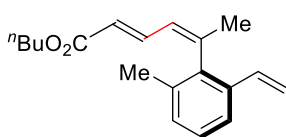

**Butyl (2E,4Z)-5-(2-methyl-6-vinylphenyl)hexa-2,4-dienoate (5)**

Following the procedure, **5** was obtained as a white oil (50.0 mg, 88% yield, 88% *ee*).

**<sup>1</sup>H NMR** (500 MHz, CDCl<sub>3</sub>)

δ 7.43 (d, *J* = 7.5 Hz, 1H), 7.19 (t, *J* = 7.5 Hz, 1H), 7.13 (d, *J* = 7.5 Hz, 1H), 6.79 (dd, *J* = 15.5, 11.5 Hz, 1H), 6.63 (dd, *J* = 17.5, 11.0 Hz, 1H), 6.36 (d, *J* = 11.5 Hz, 1H), 5.82 (d, *J* = 15.5 Hz, 1H), 5.65 (d, *J* = 17.5 Hz, 1H), 5.18 (d, *J* = 11.0 Hz, 1H), 4.04 (t, *J* = 6.5 Hz, 2H), 2.14 (s, 3H), 2.06 (s, 3H), 1.59 – 1.53 (m, 2H), 1.36 – 1.28 (m, 2H), 0.89 (t, *J* = 7.5 Hz, 3H).

**<sup>13</sup>C NMR** (125 MHz, CDCl<sub>3</sub>)

δ 166.24, 146.75, 140.49, 137.45, 133.90, 133.78, 133.65, 128.46, 126.45, 125.91, 121.65, 119.32, 114.12, 63.00, 29.65, 24.32, 18.43, 18.10, 12.68.

**HRMS (ESI)** for C<sub>19</sub>H<sub>24</sub>O<sub>2</sub>Na [M+ Na]<sup>+</sup>: 307.1669, found: 307.1675.

**FTIR** (KBr, cm<sup>-1</sup>)

3851.40, 3744.86, 3643.93, 3629.91, 3562.62, 1689.72, 1653.27, 1636.45, 1538.32, 1507.48, 1400.93, 1028.04.

**Opt. Rot.** [α]<sup>20</sup><sub>D</sub> = - 101.3 (c = 0.4, CHCl<sub>3</sub>)

**HPLC** Daicel Chiralpak OB-H column, n-hexane/*i*-PrOH (99.2/0.8), 0.5 mL/min, 254 nm,

16.436 min (major enantiomer), 11.784 min (minor enantiomer).

**Oxidation Reaction (iii)<sup>[4]</sup>** : To a solution of the aldehyde **3a** (0.2 mmol) in a mixture of *t*-BuOH/THF/H<sub>2</sub>O (3 mL, 2:1:3) at 0 °C were added NaH<sub>2</sub>PO<sub>4</sub> (4.8 mmol, 24.0 equiv), 2-methyl-2-butene (2.6 mmol, 13.0 equiv), and followed by NaClO<sub>2</sub> (0.74 mmol, 3.7 equiv). The mixture was allowed to warm to room temperature. The reaction was stirred at the same temperature for 8 h until the aldehyde was consumed. The organic solution was concentrated in vacuo to give an orange oil, which was dissolved in 10 mL EtOAc. The organic solution was washed with HCl (2 M, 10 mL × 2), water (10 mL), and brine (10 mL). The organic layer was then dried with Na<sub>2</sub>SO<sub>4</sub> and concentrated in vacuo to afford the crude product. Purification by column chromatography (PE/EA) afforded acid (**6a**).

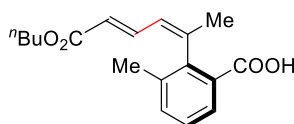

**2-((2Z,4E)-6-butoxy-6-oxohexa-2,4-dien-2-yl)-3-methylbenzoic acid (6a)**

Following the procedure, **6a** was obtained as a yellow solid (54.8 mg, 91% yield, 98% *ee*, m.p. = 83.5 °C).

**<sup>1</sup>H NMR** (500 MHz, CDCl<sub>3</sub>)

δ 7.94 (d, *J* = 7.5 Hz, 1H), 7.44 (d, *J* = 7.5 Hz, 1H), 7.31 (t, *J* = 7.5 Hz, 1H), 6.71 (dd, *J* = 15.0, 11.5 Hz, 1H), 6.28 (d, *J* = 12.0 Hz, 1H), 5.80 (d, *J* = 15.0 Hz, 1H), 4.03 (t, *J* = 6.5 Hz, 2H), 2.20 (s, 3H), 2.17 (s, 3H), 1.58 – 1.52 (m, 2H), 1.33 – 1.29 (m, 2H), 0.88 (t, *J* = 7.5 Hz, 3H).

**<sup>13</sup>C NMR** (125 MHz, CDCl<sub>3</sub>)

δ 170.52, 166.40, 147.49, 140.72, 140.26, 135.01, 134.05, 128.21, 127.01, 126.38, 124.42, 118.88, 63.01, 29.62, 24.08, 18.48, 18.10, 12.67.

**HRMS (ESI)** for C<sub>18</sub>H<sub>22</sub>O<sub>4</sub> Na [M+ Na]<sup>+</sup>: 325.1410, found: 325.1407.

**FTIR** (KBr, cm<sup>-1</sup>)

3425.23, 3385.98, 3332.71, 3265.42, 3142.06, 3004.67, 2957.01, 2351.40, 1653.27, 1636.45, 1535.51, 1510.28, 1392.52, 1019.63.

**Opt. Rot.**  $[\alpha]^{20}_D = -65.6$  ( $c = 2$ ,  $\text{CHCl}_3$ )

**HPLC** Daicel Chiralpak OD-H column, n-hexane/i-PrOH (60/40), 1.0 mL/min, 254 nm, 5.768 min (major enantiomer), 27.319 min (minor enantiomer).

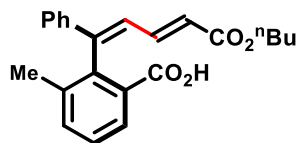

2-((1Z,3E)-5-butoxy-5-oxo-1-phenylpenta-1,3-dien-1-yl)-3-methylbenzoic acid (6b)

Following the **Oxidation Reaction (iii)** in **Further Elaboration**, with 0.1 mmol **3i**, **6b** was obtained as a yellow liquid (33.2 mg, 91% yield, 99% *ee*).

**<sup>1</sup>H NMR** (500 MHz,  $\text{CDCl}_3$ )

$\delta$  7.95 (d,  $J = 7.8$  Hz, 1H), 7.49 (d,  $J = 7.5$  Hz, 1H), 7.39 (t,  $J = 7.7$  Hz, 1H), 7.29 – 7.21 (m, 5H), 6.95 – 6.82 (m, 2H), 6.00 (d,  $J = 14.3$  Hz, 1H), 4.06 (t,  $J = 6.6$  Hz, 2H), 2.10 (s, 3H), 1.57 (dt,  $J = 14.5, 6.7$  Hz, 2H), 1.32 (dt,  $J = 14.8, 7.5$  Hz, 2H), 0.89 (t,  $J = 7.4$  Hz, 3H).

**<sup>13</sup>C NMR** (125 MHz,  $\text{CDCl}_3$ )

$\delta$  169.94, 166.09, 147.45, 140.17, 138.17, 138.00, 136.82, 133.93, 128.68, 128.20, 127.40, 127.38, 126.96, 125.64, 123.32, 121.24, 63.12, 29.63, 18.95, 18.11, 12.69.

**HRMS (ESI)** for  $\text{C}_{23}\text{H}_{24}\text{O}_4\text{Na}$   $[\text{M}+\text{Na}]^+$ : 387.1567, found: 387.1577; for  $\text{C}_{23}\text{H}_{24}\text{O}_4\text{K}$   $[\text{M}+\text{K}]^+$ : 403.1306, found: 403.1308.

**FTIR** (KBr,  $\text{cm}^{-1}$ )

3447.47, 2832.28, 1596.46, 1363.56, 1068.81, 776.04.

**Opt. Rot.**  $[\alpha]^{20}_D = -32.5$  ( $c = 0.08$ ,  $\text{CHCl}_3$ )

**HPLC** Daicel Chiralpak OD-H column, n-hexane/i-PrOH (50/50), 1 mL/min, 254 nm, 9.719 min (major enantiomer), 56.533 min (minor enantiomer).

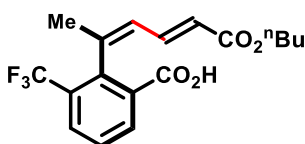

2-((2Z,4E)-6-butoxy-6-oxohexa-2,4-dien-2-yl)-3-(trifluoromethyl)benzoic acid (6c)



Following the **Oxidation Reaction (iii)** in **Further Elaboration**, with 0.1 mmol **3g**, **6c** was obtained as a yellow liquid (30.6 mg, 86% yield, 99% *ee*).

**<sup>1</sup>H NMR** (500 MHz, CDCl<sub>3</sub>)

δ 8.23 (d, *J* = 7.8 Hz, 1H), 7.94 (d, *J* = 7.7 Hz, 1H), 7.57 (t, *J* = 7.9 Hz, 1H), 6.64 (dd, *J* = 15.1, 11.7 Hz, 1H), 6.34 (d, *J* = 11.6 Hz, 1H), 5.81 (d, *J* = 15.2 Hz, 1H), 4.04 (t, *J* = 6.6 Hz, 2H), 2.24 (s, 3H), 1.55 (dt, *J* = 14.5, 6.7 Hz, 2H), 1.35 – 1.28 (m, 2H), 0.88 (t, *J* = 7.4 Hz, 3H).

**<sup>13</sup>C NMR** (125 MHz, CDCl<sub>3</sub>)

δ 168.86, 166.30, 143.21, 139.98, 133.62, 129.70 (q, *J*<sub>CF</sub> = 5.4 Hz), 129.57, 128.83, 128.59, 126.98, 126.74, 122.46 (d, *J*<sub>CF</sub> = 272.5 Hz), 119.46, 63.16, 29.59, 25.01, 18.08, 12.65.

**HRMS (ESI)** for C<sub>18</sub>H<sub>19</sub>F<sub>3</sub>O<sub>4</sub>Na [M+Na]<sup>+</sup>: 379.1128, found: 379.1128; for C<sub>18</sub>H<sub>19</sub>F<sub>3</sub>O<sub>4</sub>K [M+K]<sup>+</sup>: 395.0867, found: 395.0864.

**FTIR** (KBr, cm<sup>-1</sup>)

2960.83, 2919.57, 2829.16, 1595.29, 1364.40, 1311.09, 1260.03, 1088.41, 1025.86, 797.61, 775.42

**Opt. Rot.** [α]<sup>20</sup><sub>D</sub> = -102.7 (c = 0.29, CHCl<sub>3</sub>)

**HPLC** Daicel Chiralpak AD-H column, n-hexane/*i*-PrOH (60/40), 1 mL/min, 254 nm, 5.918 min (major enantiomer), 4.552 min (minor enantiomer).

**Reduction Reaction**<sup>[5]</sup>: To a solution of aldehyde **3a** (0.2 mmol) in MeOH (0.2 M) was added dropwise NaBH<sub>4</sub> (2.0 equiv) over 30 min at 0°C and stirred at r.t. for 8 h. 2 M HCl was added slowly until a clear solution was obtained. The layer was separated and the aqueous phase was extracted with Et<sub>2</sub>O (10 mL × 3). The organic layers were combined and dried over Na<sub>2</sub>SO<sub>4</sub>. After removing the solvent under reduced pressure, the residue was purified by column chromatography on silica gel to afford the resulting alcohol (**7**).

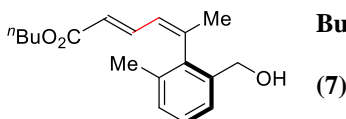

---

Following the procedure, **7** was obtained as a colorless oil (54.9 mg, 95% yield, 98% *ee*).

**<sup>1</sup>H NMR** (500 MHz, CDCl<sub>3</sub>)

δ 7.32 (d, *J* = 7.5 Hz, 1H), 7.23 (s, 1H), 7.17 (d, *J* = 7.5 Hz, 1H), 6.77 (dd, *J* = 15.5, 11.5 Hz, 1H), 6.37 (d, *J* = 11.5 Hz, 1H), 5.84 (d, *J* = 15.5 Hz, 1H), 4.50 (d, *J* = 3.0 Hz, 2H), 4.05 (t, *J* = 6.5 Hz, 2H), 2.16 (s, 3H), 2.11 (s, 3H), 1.59 – 1.54 (m, 3H), 1.36 – 1.29 (m, 2H), 0.89 (t, *J* = 7.5 Hz, 3H).

**<sup>13</sup>C NMR** (125 MHz, CDCl<sub>3</sub>)

δ 166.19, 146.45, 140.07, 137.30, 136.37, 133.75, 128.58, 126.76, 125.83, 124.38, 119.60, 63.09, 62.25, 29.63, 24.34, 18.21, 18.10, 12.67.

**HRMS (ESI)** for C<sub>18</sub>H<sub>24</sub>O<sub>3</sub>Na [M+ Na]<sup>+</sup>: 311.1618, found: 311.1614.

**FTIR** (KBr, cm<sup>-1</sup>)

3854.21, 3744.86, 3629.91, 3568.22, 3456.07, 3414.02, 2354.21, 1656.07, 1633.64, 1560.75, 1504.67, 1457.01, 1406.54, 1386.92, 1025.23, 803.74.

**Opt. Rot.** [α]<sup>20</sup><sub>D</sub> = - 2.9 (c = 0.8, CHCl<sub>3</sub>)

**HPLC** Daicel Chiralpak OD-H column, n-hexane/*i*-PrOH (60/40), 1.0 mL/min, 254 nm, 6.121 min (major enantiomer), 15.077 min (minor enantiomer).

## 7. Co<sup>III</sup>-catalyzed Enantioselective 1,4-Addition of Indoles and Maleimides<sup>[6]</sup>

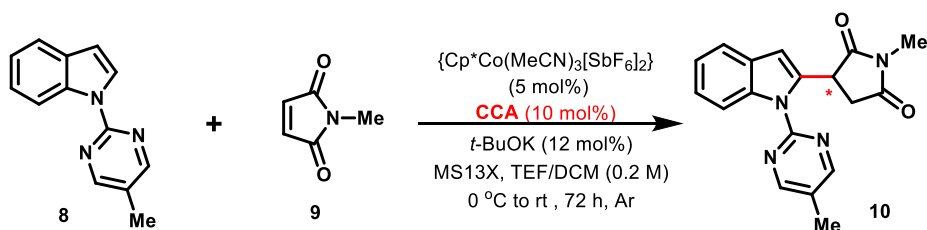

*reported*

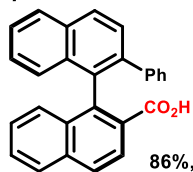

86%, 81:19 er  
(by Yoshino & Matsunaga, ref. 16)

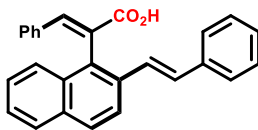

49%, 77:23 er  
(by Wang, ref. 7d)

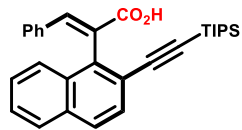

55%, 82:18 er  
(by Wang, ref. 7e)

*This work*

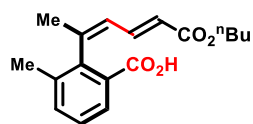

**6a**, 24%, 30:70 er

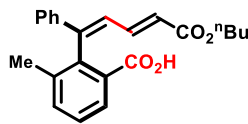

**6b**, 36%, 9:91 er

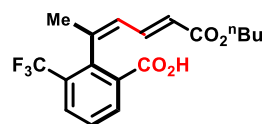

**6c**, 36%, 35:65 er

To an oven-dried 25 mL Schlenk tube was added N-(5-methyl)-pyrimidyl indole **8** (0.20 mmol, 1.0 equiv), maleimide **9** (0.4 mmol, 2 equiv), CCA (0.02 mmol, 10 mol %),  $[Cp^*Co(MeCN)_3][SbF_6]_2$  (0.01 mmol), activated MS13X (40 mg). To the mixture were added *t*-BuOK in TFE (0.1 M, 240  $\mu$ L, 0.024 mmol, 12 mol %), TFE (560  $\mu$ L), and DCM (200  $\mu$ L) at 0 °C, and the mixture was stirred at 25 °C. After 72 hours, the reaction mixture was filtered through a short pad of silica gel and purified by silica gel column chromatography (petroleum ether/ethyl acetate = 10/1 to 2/1) to afford **10** as white solid.

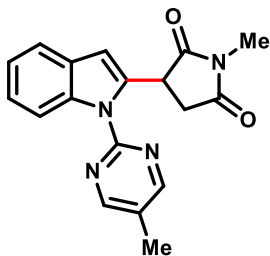

---

### 1-methyl-3-(1-(5-methylpyrimidin-2-yl)-1H-indol-2-yl)pyrrolidine-2,5-dione (10)

**<sup>1</sup>H NMR** (500 MHz, CDCl<sub>3</sub>)

δ 8.55 (d, *J* = 7.8 Hz, 1H), 8.43 (s, 2H), 7.56 (d, *J* = 7.1 Hz, 1H), 7.31 (t, *J* = 7.0 Hz, 1H), 7.23 (q, *J* = 9.1, 6.8 Hz, 1H), 6.67 (s, 1H), 4.77 (s, 1H), 3.17 – 3.05 (m, 4H), 2.97 – 2.84 (m, 1H), 2.30 (s, 3H).

**<sup>13</sup>C NMR** (125 MHz, CDCl<sub>3</sub>)

δ 175.99 , 175.44 , 156.71 , 154.84 , 136.26 , 132.53 , 127.52 , 125.21 , 122.96 , 121.29 , 119.30 , 114.48 , 109.57 , 41.18 , 35.50 , 24.05 , 14.02 .

**HRMS (ESI)** for C<sub>18</sub>H<sub>16</sub>O<sub>2</sub>N<sub>4</sub> H [M+ H]<sup>+</sup>: 321.1346, found: 321.1137.

**FTIR** 2925.20, 2828.58, 1699.93, 1591.69, 1365.93, 775.34

**HPLC** Daicel Chiralpak IA column, n-hexane/i-PrOH (80/20), 1.0 mL/min, 254 nm, 17.130 min (major enantiomer), 37.385 min (minor enantiomer).

## 8. Density Functional Theory (DFT) Calculations

### 8.1 Computational Details and Rotational Barrier Calculated by DFT

All density functional theory (DFT) calculations were carried out using Gaussian16 software package.<sup>[7]</sup> All geometry optimizations were performed with B3LYP<sup>[8-9]</sup>-D3<sup>[10]</sup> functional and 6-31G (d) basis set. The vibrational frequencies were computed at the same level of theory as for the geometry optimizations, and to evaluate the zero-point vibrational energy (ZPVE) and thermal corrections at 298 K. The single-point energies were computed based on the gas-phase optimized structures, using M06-2x<sup>[11]</sup> functional and 6-311+G (d, p) basis set, with the inclusion of solvation energy corrections using a self-consistent reaction field (SCRF) based on SMD implicit solvent model<sup>[17]</sup> with DMSO as solvent. Free energies were corrected using Truhlar's quasiharmonic correction, by raising vibrational frequencies that are below 100 cm<sup>-1</sup>.<sup>[12]</sup> All reported energies were computed at 298.15K. DFT-optimized structures are illustrated using CYLView.

---

## 8.2 Enantiomeric conversion half-life calculation strategy

The Eyring Equation relates the activation free energy and rate constant:

$$k = \frac{\kappa_b T}{h} e^{-\frac{\Delta G^\ddagger}{RT}} \quad (1)$$

In this equation,  $\Delta G^\ddagger$  is the Gibbs energy of activation,  $\kappa$  is the transmission coefficient,  $k_b$  is Boltzmann's constant, and  $h$  is Planck's constant. The transmission coefficient is often assumed to be equal to one as it reflects what fraction of the flux through the transition state proceeds to the product without recrossing the transition state.

The epimerization of atropisomer is a first order reaction, which makes the half-life only relates to the reaction rate constant:

$$t_{1/2} = \ln 2 / k \quad (2)$$

Based on Equations 1 and 2, the half-life at 40 °C (reaction conditions) and 25 °C (room temperature) was calculated.

Table S4. Table of Energies and Figures

| Structure    | E           | ZPE      | H           | T.S      | T.qh-S   | G(T)        | qh-G(T)     |
|--------------|-------------|----------|-------------|----------|----------|-------------|-------------|
| <b>3a-TS</b> | -924.823022 | 0.355135 | -924.445535 | 0.075135 | 0.070643 | -924.52067  | -924.516178 |
| <b>3a</b>    | -924.872508 | 0.354131 | -924.494676 | 0.078712 | 0.073626 | -924.573388 | -924.568301 |
| <b>3c-TS</b> | -806.868959 | 0.271208 | -806.57951  | 0.064238 | 0.061691 | -806.643748 | -806.641201 |
| <b>3c</b>    | -806.918472 | 0.270186 | -806.628684 | 0.067808 | 0.064679 | -806.696492 | -806.693363 |

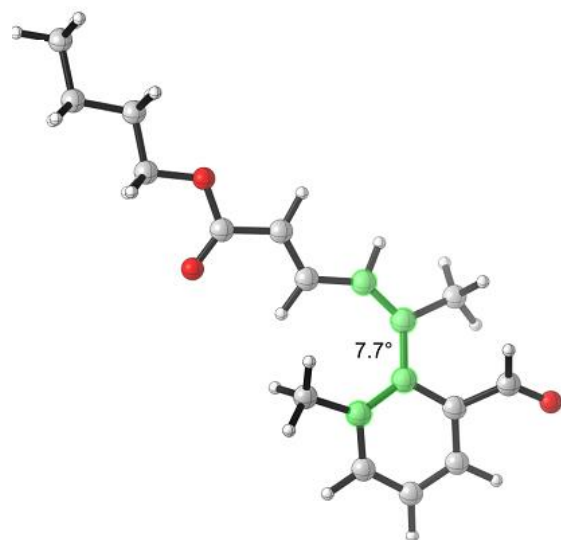

**3a-TS**

$\Delta G^\ddagger = 32.4$  kcal/mol  
 $t_{1/2}$  (25 °C) = 2043 yrs  
 $t_{1/2}$  (40 °C) = 141 yrs

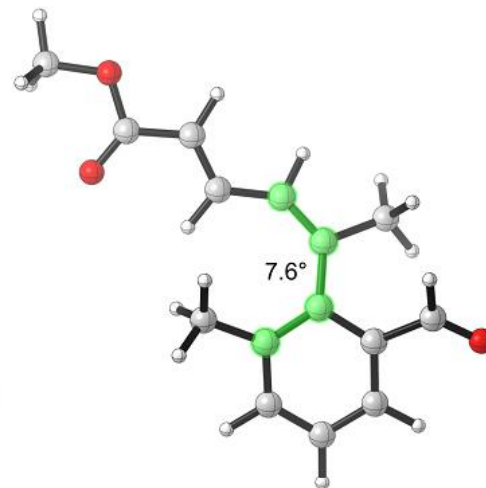

**3e-TS**

$\Delta G^\ddagger = 32.5$  kcal/mol  
 $t_{1/2}$  (25 °C) = 2419 yrs  
 $t_{1/2}$  (40 °C) = 166 yrs

---

**3a-TS**

|   |           |           |           |
|---|-----------|-----------|-----------|
| C | -2.889902 | 1.451963  | 0.112028  |
| C | -3.903114 | 2.391083  | -0.143530 |
| C | -5.223851 | 2.036232  | -0.379501 |
| C | -5.573801 | 0.704631  | -0.204413 |
| C | -4.595898 | -0.257560 | 0.060088  |
| C | -3.189481 | 0.056409  | 0.048259  |
| C | -2.215100 | -1.070543 | -0.140083 |
| C | -0.841876 | -1.136557 | -0.164930 |
| C | -1.574585 | 2.067105  | 0.535349  |
| H | -3.630065 | 3.443696  | -0.135680 |
| H | -5.972624 | 2.790184  | -0.603738 |
| H | -6.610154 | 0.382878  | -0.211920 |
| H | -0.489815 | -2.159555 | -0.296320 |
| H | -0.917877 | 2.308492  | -0.307388 |
| H | -1.030548 | 1.433616  | 1.236783  |
| H | -1.778879 | 3.012605  | 1.047761  |
| C | -2.816175 | -2.440521 | -0.505947 |
| H | -3.734251 | -2.353779 | -1.091488 |
| H | -3.033046 | -3.061818 | 0.369493  |
| H | -2.112415 | -3.004306 | -1.122000 |
| C | -5.171883 | -1.531744 | 0.592491  |
| O | -6.293056 | -1.935004 | 0.346396  |
| H | -4.546983 | -2.053186 | 1.342030  |
| C | 0.291048  | -0.244244 | -0.140917 |
| H | 0.188017  | 0.821612  | -0.239208 |
| C | 1.562399  | -0.701167 | -0.074537 |
| H | 1.802297  | -1.757946 | 0.005332  |
| C | 2.687237  | 0.251435  | -0.105428 |
| O | 2.589479  | 1.463601  | -0.194278 |
| O | 3.873174  | -0.398027 | -0.021222 |
| C | 5.048039  | 0.439668  | -0.041727 |
| H | 4.994688  | 1.150907  | 0.790868  |
| H | 5.054323  | 1.024223  | -0.969148 |
| C | 6.262397  | -0.467775 | 0.064654  |
| H | 6.187113  | -1.057969 | 0.987444  |
| H | 6.247273  | -1.183239 | -0.768062 |
| C | 7.577017  | 0.322187  | 0.053343  |
| H | 7.577669  | 1.041829  | 0.884060  |
| H | 7.636858  | 0.918310  | -0.868083 |
| C | 8.807630  | -0.583938 | 0.158767  |
| H | 9.735098  | -0.000707 | 0.149481  |
| H | 8.787934  | -1.168368 | 1.086707  |
| H | 8.848015  | -1.292015 | -0.677892 |

---

**3a**

|   |           |           |           |
|---|-----------|-----------|-----------|
| C | 3.060514  | 1.039979  | 1.210658  |
| C | 3.631468  | 2.240151  | 0.771317  |
| C | 4.183693  | 2.366756  | -0.505907 |
| C | 4.165409  | 1.282139  | -1.371204 |
| C | 3.597308  | 0.067775  | -0.959767 |
| C | 3.044424  | -0.063486 | 0.332095  |
| C | 2.493505  | -1.375237 | 0.802335  |
| C | 1.168198  | -1.636837 | 0.824840  |
| C | 2.456753  | 0.943247  | 2.593253  |
| H | 3.641071  | 3.093305  | 1.445501  |
| H | 4.619069  | 3.311911  | -0.817737 |
| H | 4.574782  | 1.343001  | -2.374612 |
| H | 0.835535  | -2.602329 | 1.205651  |
| H | 2.840011  | 0.076888  | 3.144471  |
| H | 1.367786  | 0.828682  | 2.542011  |
| H | 2.674073  | 1.840790  | 3.179725  |
| C | 3.515169  | -2.367408 | 1.296160  |
| H | 4.093033  | -1.942542 | 2.128198  |
| H | 4.242214  | -2.604442 | 0.508340  |
| H | 3.050867  | -3.299041 | 1.634381  |
| C | 3.569716  | -1.058609 | -1.926593 |
| O | 4.079510  | -1.020597 | -3.031805 |
| H | 3.032255  | -1.967292 | -1.586442 |
| C | 0.140028  | -0.715616 | 0.391349  |
| H | 0.448953  | 0.248958  | -0.007608 |
| C | -1.181984 | -0.969867 | 0.456842  |
| H | -1.571760 | -1.910017 | 0.837349  |
| C | -2.161744 | 0.037244  | 0.005133  |
| O | -1.896306 | 1.143041  | -0.430602 |
| O | -3.427106 | -0.429649 | 0.140074  |
| C | -4.473268 | 0.473445  | -0.274628 |
| H | -4.321404 | 0.737326  | -1.327757 |
| H | -4.397694 | 1.399797  | 0.306897  |
| C | -5.802627 | -0.228600 | -0.052132 |
| H | -5.811099 | -1.165977 | -0.623776 |
| H | -5.887229 | -0.505671 | 1.006985  |
| C | -6.993998 | 0.646069  | -0.461925 |
| H | -6.893977 | 0.926700  | -1.519820 |
| H | -6.970002 | 1.585810  | 0.107566  |
| C | -8.339181 | -0.052904 | -0.241706 |
| H | -9.176115 | 0.588092  | -0.540282 |
| H | -8.401461 | -0.979616 | -0.825098 |
| H | -8.477989 | -0.316135 | 0.814006  |



---

**3e-TS**

|   |           |           |           |
|---|-----------|-----------|-----------|
| C | -1.399828 | 1.468385  | 0.099310  |
| C | -2.363126 | 2.452779  | -0.178060 |
| C | -3.695647 | 2.159403  | -0.431315 |
| C | -4.111410 | 0.847365  | -0.252188 |
| C | -3.184722 | -0.158264 | 0.033948  |
| C | -1.764872 | 0.088301  | 0.041402  |
| C | -0.842687 | -1.085228 | -0.123251 |
| C | 0.526112  | -1.217055 | -0.126453 |
| C | -0.062704 | 2.023397  | 0.537019  |
| H | -2.040224 | 3.491192  | -0.173771 |
| H | -4.404166 | 2.946388  | -0.672218 |
| H | -5.161743 | 0.575430  | -0.273278 |
| H | 0.830559  | -2.256890 | -0.243612 |
| H | 0.616719  | 2.225655  | -0.297988 |
| H | 0.440122  | 1.370694  | 1.251517  |
| H | -0.228552 | 2.982069  | 1.038694  |
| C | -1.502850 | -2.428217 | -0.486994 |
| H | -2.406693 | -2.303159 | -1.087524 |
| H | -1.762371 | -3.030328 | 0.390224  |
| H | -0.817568 | -3.030552 | -1.087157 |
| C | -3.829224 | -1.399360 | 0.566360  |
| O | -4.964148 | -1.750852 | 0.304699  |
| H | -3.242076 | -1.943628 | 1.330052  |
| C | 1.700009  | -0.379917 | -0.093303 |
| H | 1.649667  | 0.688757  | -0.201701 |
| C | 2.946946  | -0.897047 | -0.005112 |
| H | 3.134561  | -1.963294 | 0.086819  |
| C | 4.115435  | 0.000083  | -0.028137 |
| O | 4.081116  | 1.214350  | -0.128637 |
| O | 5.269455  | -0.705019 | 0.078717  |
| C | 6.467088  | 0.085830  | 0.065459  |
| H | 7.289783  | -0.623876 | 0.160967  |
| H | 6.548754  | 0.646552  | -0.870497 |
| H | 6.470735  | 0.794420  | 0.899141  |

**3e**

|   |          |           |           |
|---|----------|-----------|-----------|
| C | 1.682055 | 1.320506  | 0.947237  |
| C | 2.308717 | 2.351437  | 0.237369  |
| C | 2.939492 | 2.121764  | -0.988029 |
| C | 2.945405 | 0.843055  | -1.526909 |
| C | 2.322927 | -0.209137 | -0.839834 |
| C | 1.690456 | 0.020086  | 0.400828  |
| C | 1.078605 | -1.109801 | 1.171779  |

---

|   |           |           |           |
|---|-----------|-----------|-----------|
| C | -0.251979 | -1.344626 | 1.177336  |
| C | 0.994346  | 1.608130  | 2.262488  |
| H | 2.299644  | 3.355521  | 0.654744  |
| H | 3.416741  | 2.943019  | -1.515162 |
| H | 3.415604  | 0.625648  | -2.480720 |
| H | -0.632155 | -2.167212 | 1.782815  |
| H | 1.323272  | 0.922393  | 3.051729  |
| H | -0.092015 | 1.491097  | 2.174720  |
| H | 1.197432  | 2.630048  | 2.595906  |
| C | 2.042222  | -1.938599 | 1.981957  |
| H | 2.579822  | -1.307993 | 2.703039  |
| H | 2.808915  | -2.387739 | 1.337078  |
| H | 1.534212  | -2.738608 | 2.529486  |
| C | 2.324821  | -1.555627 | -1.465393 |
| O | 2.900267  | -1.823302 | -2.504587 |
| H | 1.745667  | -2.333518 | -0.927065 |
| C | -1.227205 | -0.567774 | 0.443342  |
| H | -0.869171 | 0.249462  | -0.180290 |
| C | -2.556973 | -0.784271 | 0.486988  |
| H | -2.993841 | -1.582237 | 1.080963  |
| C | -3.479089 | 0.069519  | -0.285178 |
| O | -3.161935 | 1.012686  | -0.986531 |
| O | -4.764076 | -0.332437 | -0.113774 |
| C | -5.740167 | 0.438142  | -0.830212 |
| H | -6.704806 | -0.009777 | -0.588197 |
| H | -5.711891 | 1.485628  | -0.515290 |
| H | -5.553269 | 0.391868  | -1.907236 |

---

## 9. References

- [1] M. Liu, P. Yang, M. K. Karunananda, Y. Wang, P. Liu and K. M. Engle, C(alkenyl)–H Activation via Six-Membered Palladacycles: Catalytic 1,3-Diene Synthesis, *J. Am. Chem. Soc.*, 2018, **140**, 5805-5813.
- [2] B. Bradshaw, P. Evans, J. Fletcher, A. T. L. Lee, P. G. Mwashimba, D. Oehlich, E. J. Thomas, R. H. Davies, B. C. P. Allen, K. J. Broadley, A. Hamrouni and C. Escargueil, Synthesis of 5-hydroxy-2,3,4,5-tetrahydro-[1H]-2-benzazepin-4-ones: selective antagonists of muscarinic (M<sub>3</sub>) receptors, *Org. Biomol. Chem.*, 2008, **6**, 2138–2157.
- [3] B.-H. Zhang, L.-S. Lei, S.-Z. Liu, X.-Q. Mou, W.-T. Liu, .-H. Wang, J. Wang, W. Bao and K. Zhang, Zinc-promoted cyclization of tosylhydrazones and 2-(dimethylamino)malononitrile: an efficient strategy for the synthesis of substituted 1-tosyl-1H-pyrazoles, *Chem. Commun.*, 2017, **53**, 8545-8548.
- [4] J. Li, E. Chin, A. S. Lui and L. Chen, One-pot synthesis of phthalides via regioselective intramolecular cyclization from ortho-alkynylbenzaldehydes, *Tetrahedron. Lett.*, 2010, **51**, 5937-5939.
- [5] P. Zheng, X. Han, J. Hu, X. Zhao, and T. Xu, Enantioselective Copper-Catalyzed Desymmetrization of 1,3-Diketones Involving Borylation of Styrenes, *Org. Lett.*, 2019, **21**, 6040–6044.
- [6] T. Urihara, M. Kojima, T. Yoshino and S. Matsunaga, Cp\*Co<sup>III</sup>/Chiral Carboxylic Acid-Catalyzed Enantioselective 1, 4-Addition Reactions of Indoles to Maleimides, *Asian. J. Org. Chem.*, 2020, **9**, 368-371.
- [7] M. J. Frisch, G. W. Trucks, H. B. Schlegel, G. E. Scuseria, M. A. Robb, J. R. Cheeseman, G. Scalmani, V. Barone, G. A. Petersson, H. Nakatsuji, X. Li, M. Caricato, A. V. Marenich, J. Bloino, B. G. Janesko, R. Gomperts, B. Mennucci, H. P. Hratchian, J. V. Ortiz, A. F. Izmaylov, J. L. Sonnenberg, D. Williams- Young, F. Ding, F. Lipparini, F. Egidi, J. Goings, B. Peng, A. Petrone, T. Henderson, D. Ranasinghe, V. G. Zakrzewski, J. Gao, N. Rega, G. Zheng, W. Liang, M. Hada, M. Ehara, K. Toyota, R. Fukuda, J. Hasegawa, M. Ishida, T. Nakajima, Y. Honda, O. Kitao, H. Nakai, T. Vreven, K. Throssell, J. A. Montgomery, Jr., J. E. Peralta, F. Ogliaro, M. J. Bearpark, J. J. Heyd,

- 
- E. N. Brothers, K. N. Kudin, V. N. Staroverov, T. A. Keith, R. Kobayashi, J. Normand, K. Raghavachari, A. P. Rendell, J. C. Burant, S. S. Iyengar, J. Tomasi, M. Cossi, J. M. Millam, M. Klene, C. Adamo, R. Cammi, J. W. Ochterski, R. L. Martin, K. Morokuma, O. Farkas, J. B. Foresman, and D. J. *Gaussian 16*, Revision A.03, Gaussian, Inc., Wallingford CT, **2016**.
- [8] M. Head-Gordon, J. A. Pople, M. J. Frisch, MP<sub>2</sub> energy evaluation by direct methods. *Chem. Phys. Lett.*, 1988, **153**, 503-506.
- [9] C. Lee, W. Yang and R. G. Parr, Development of the Colle-Salvetti correlation-energy formula into a functional of the electron density. *Phys. Rev. B: Condens. Matter Mater. Phys.*, 1988, **37**, 785.

## 10. NMR Charts

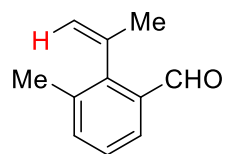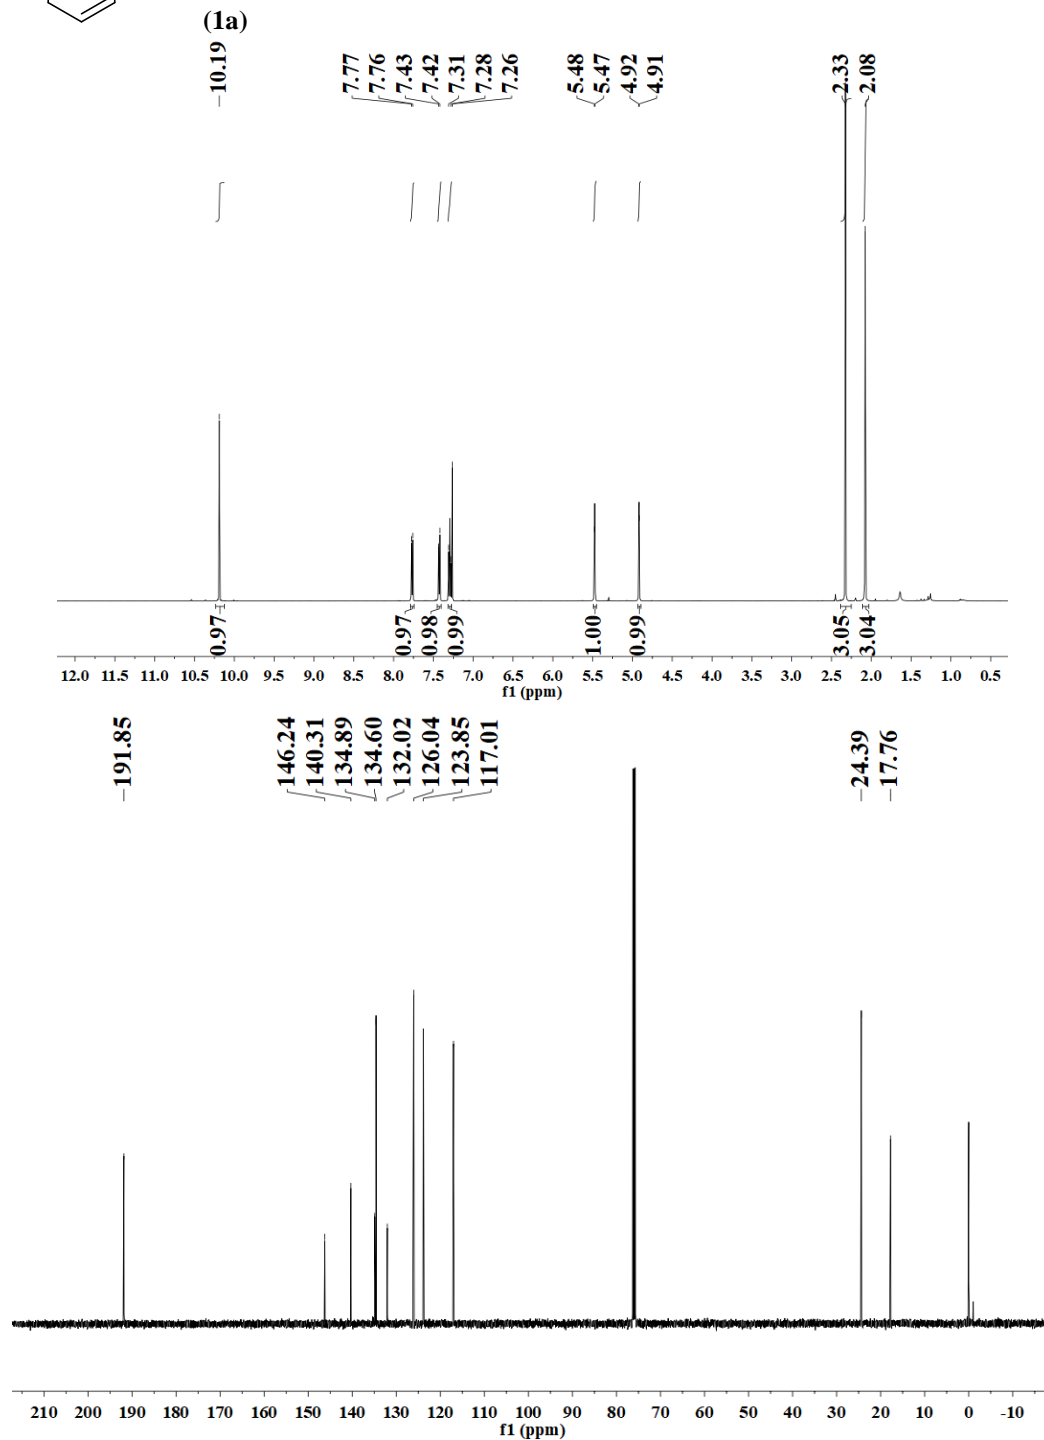

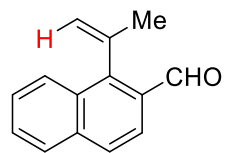

(b)

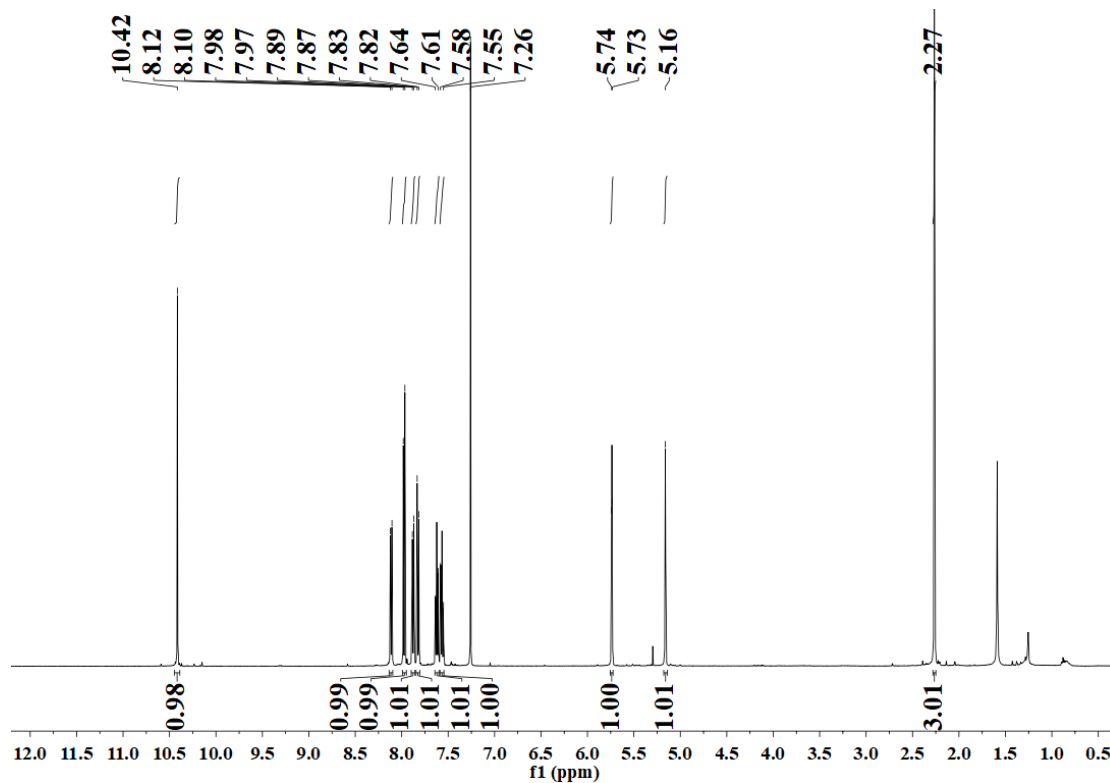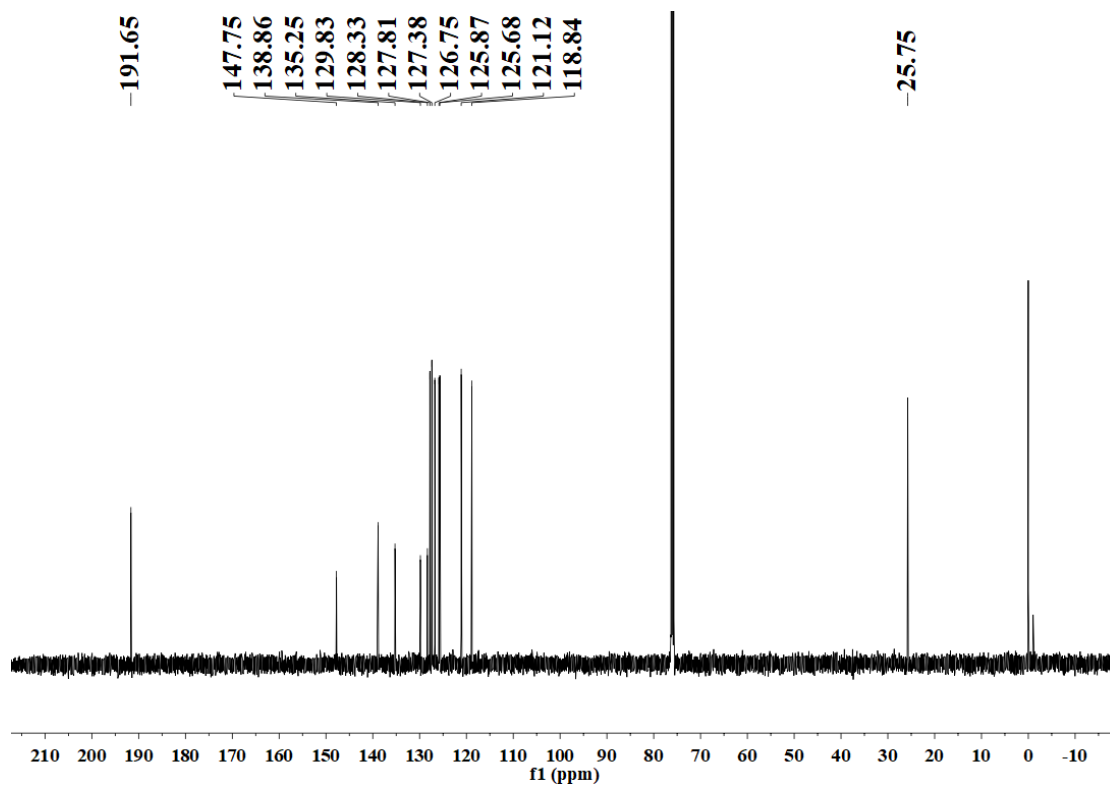

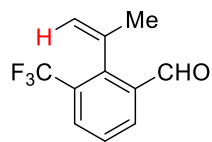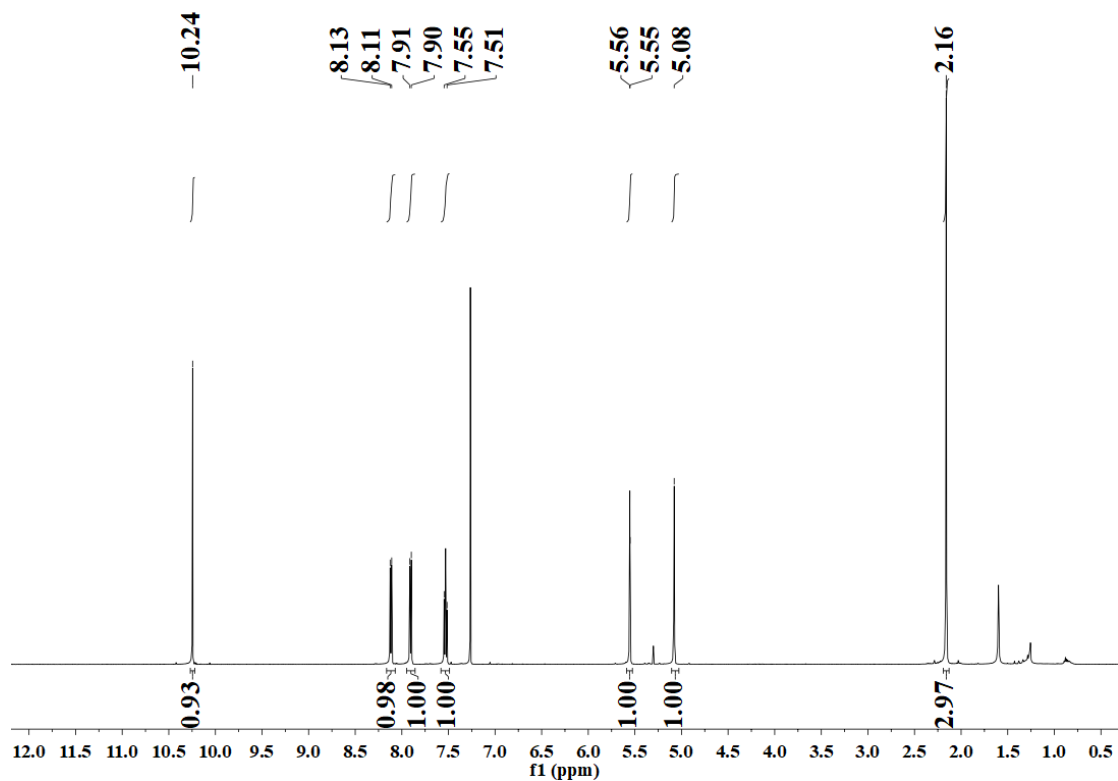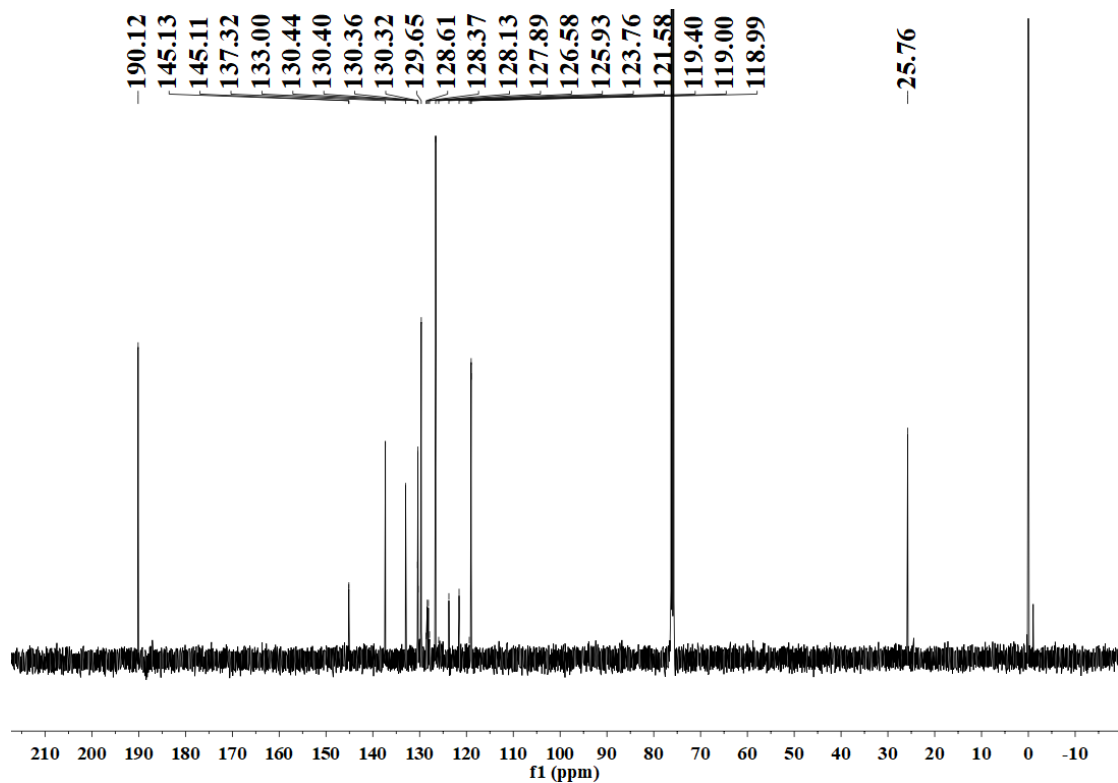

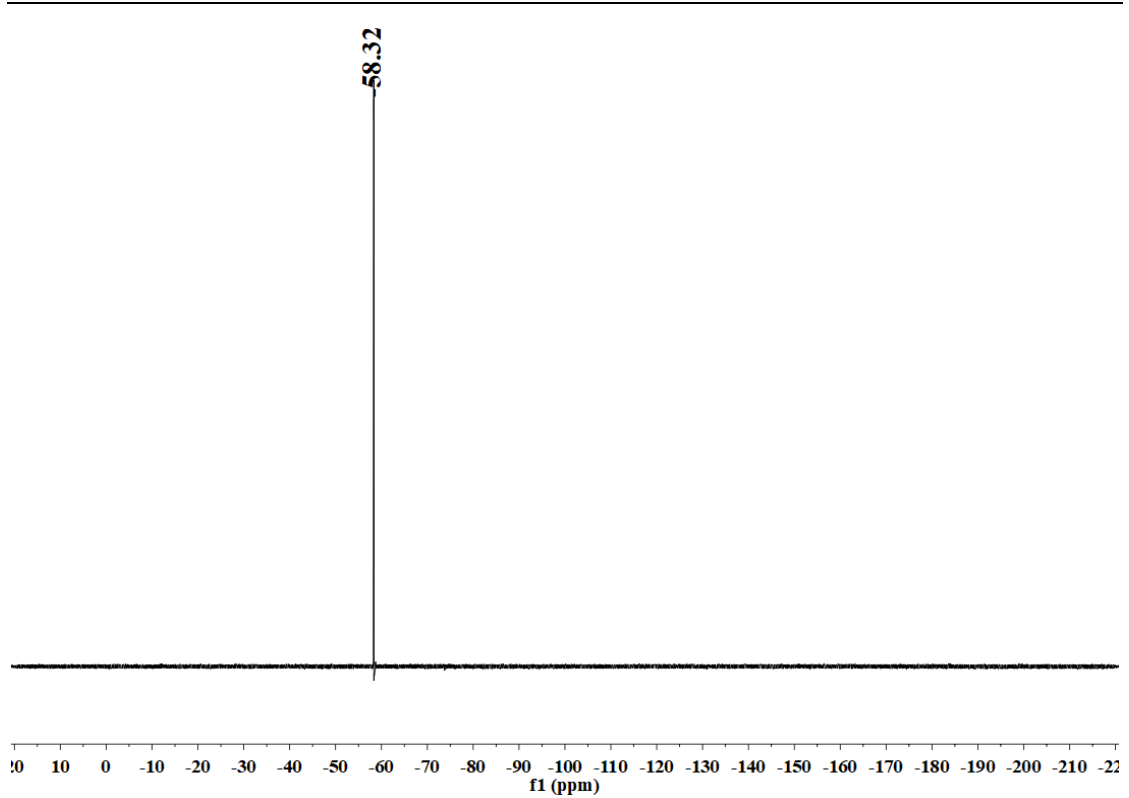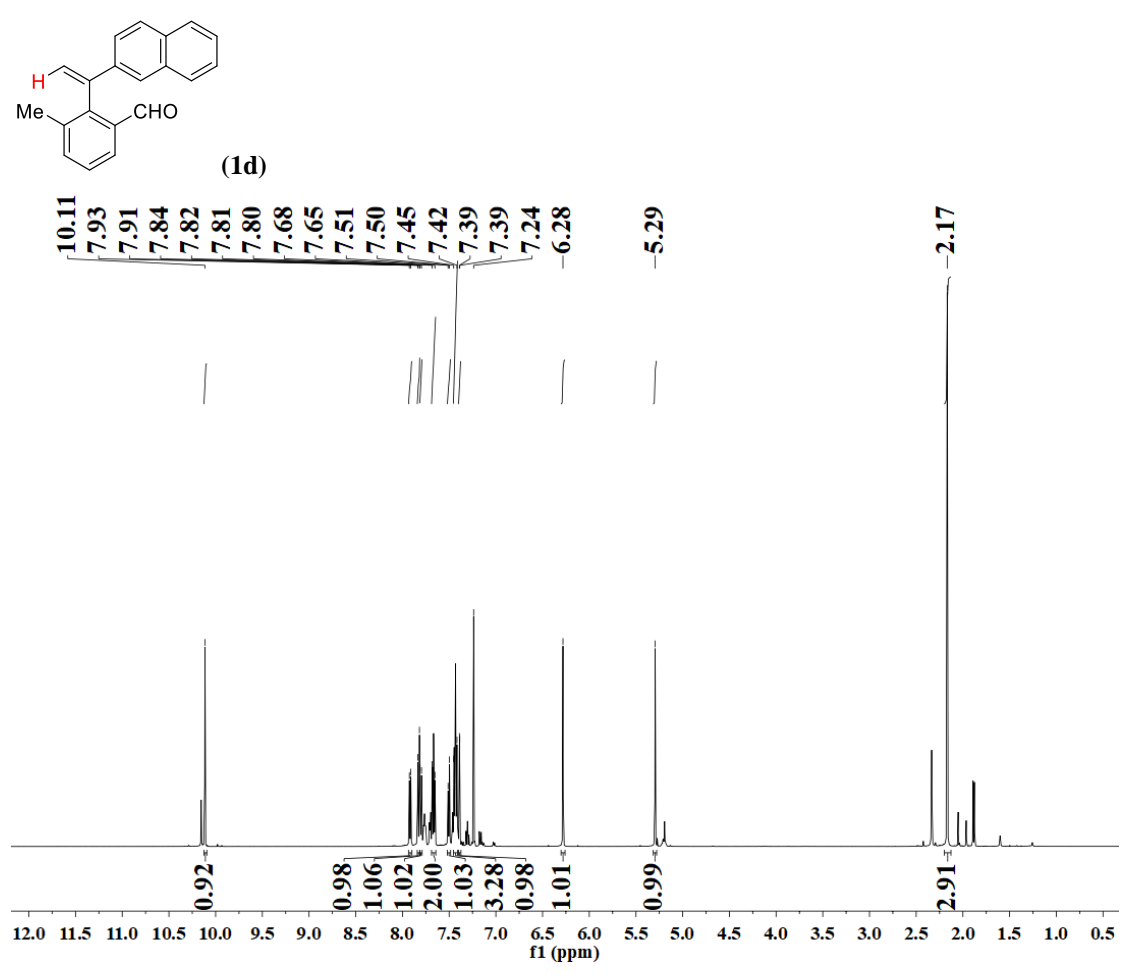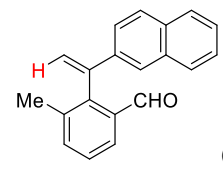

(1d)



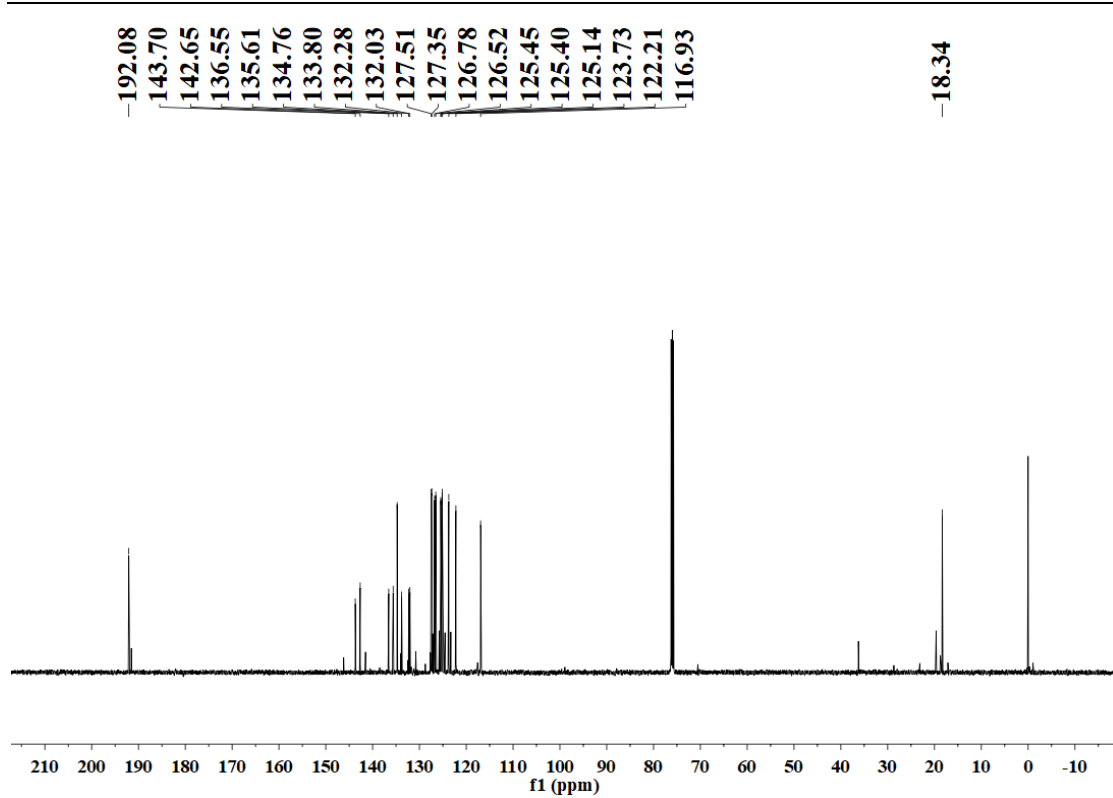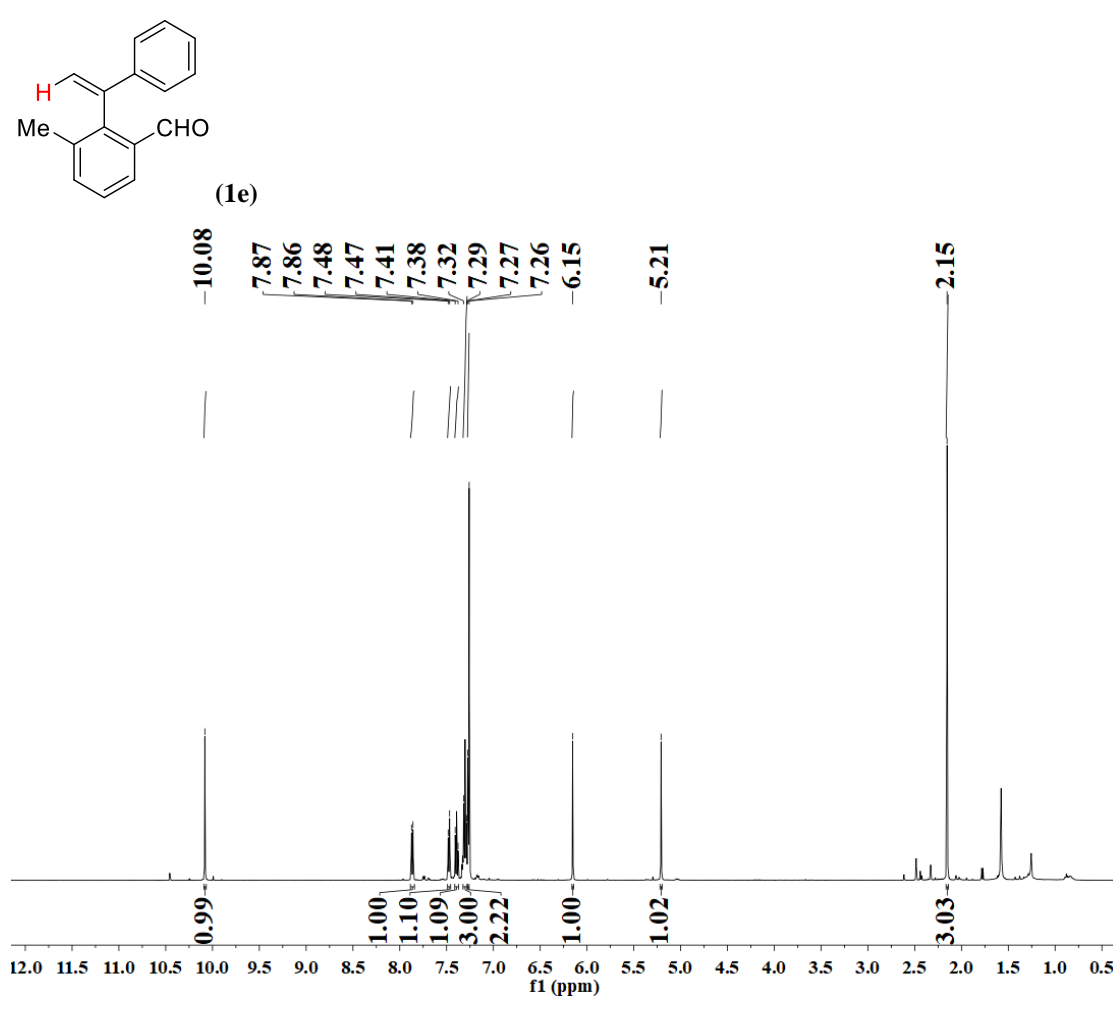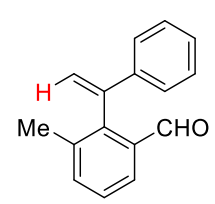

(1e)

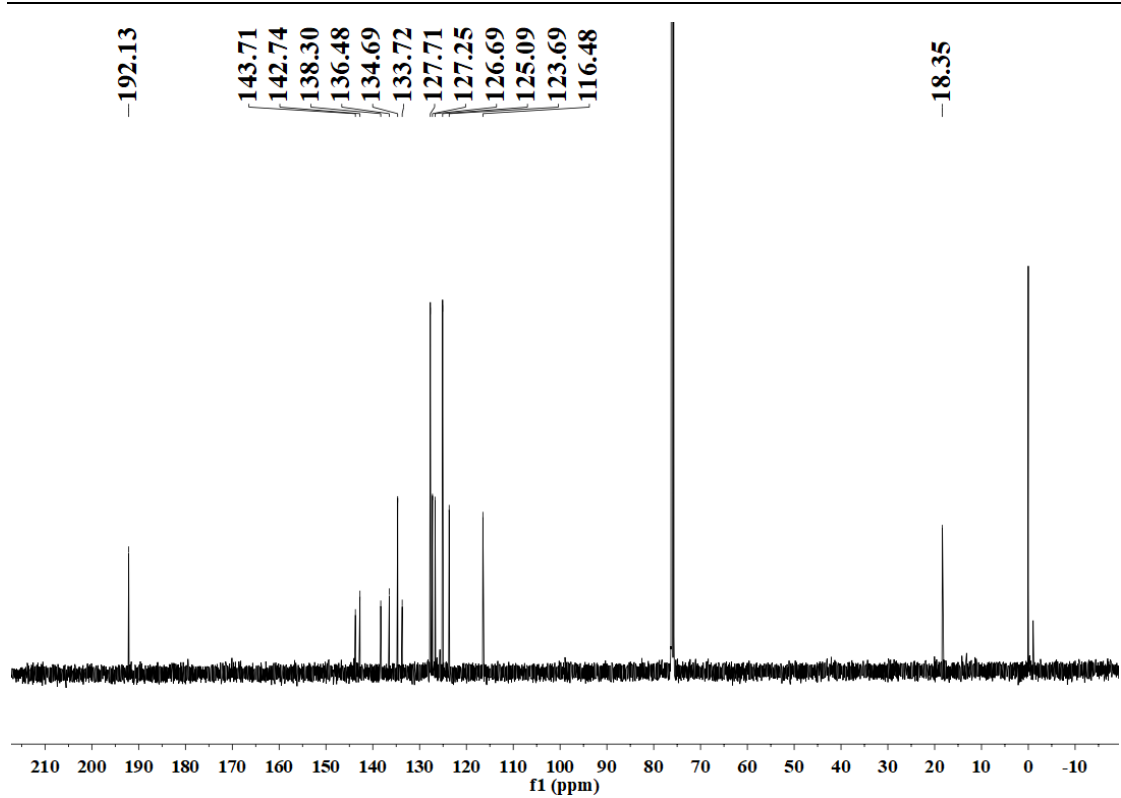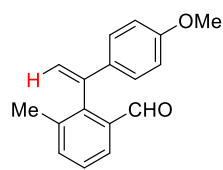

(1f)

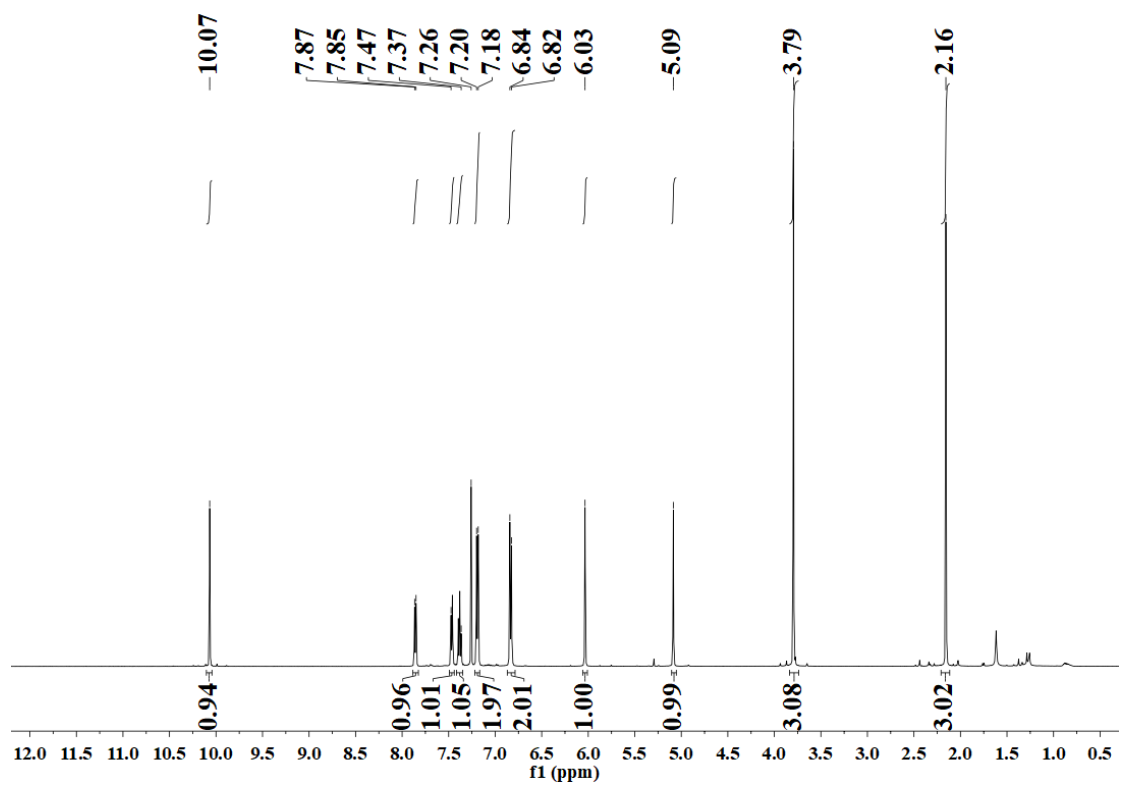

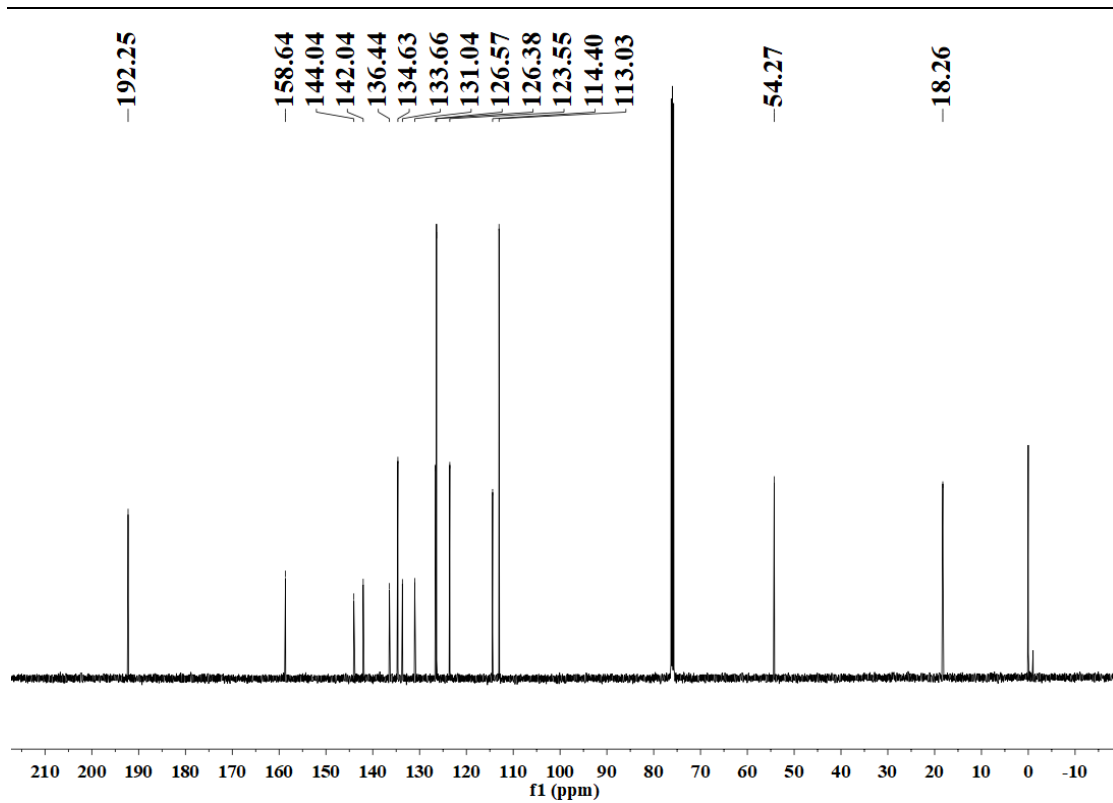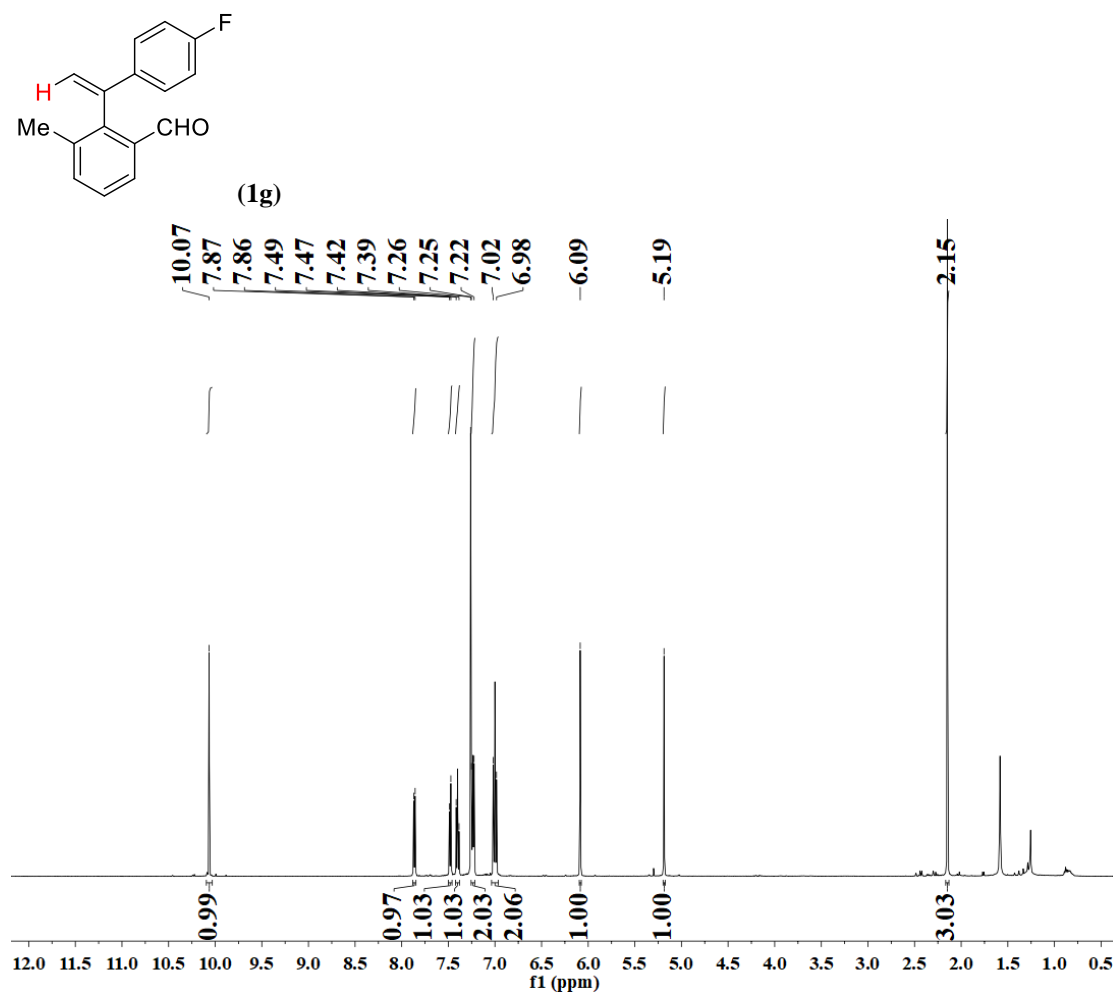

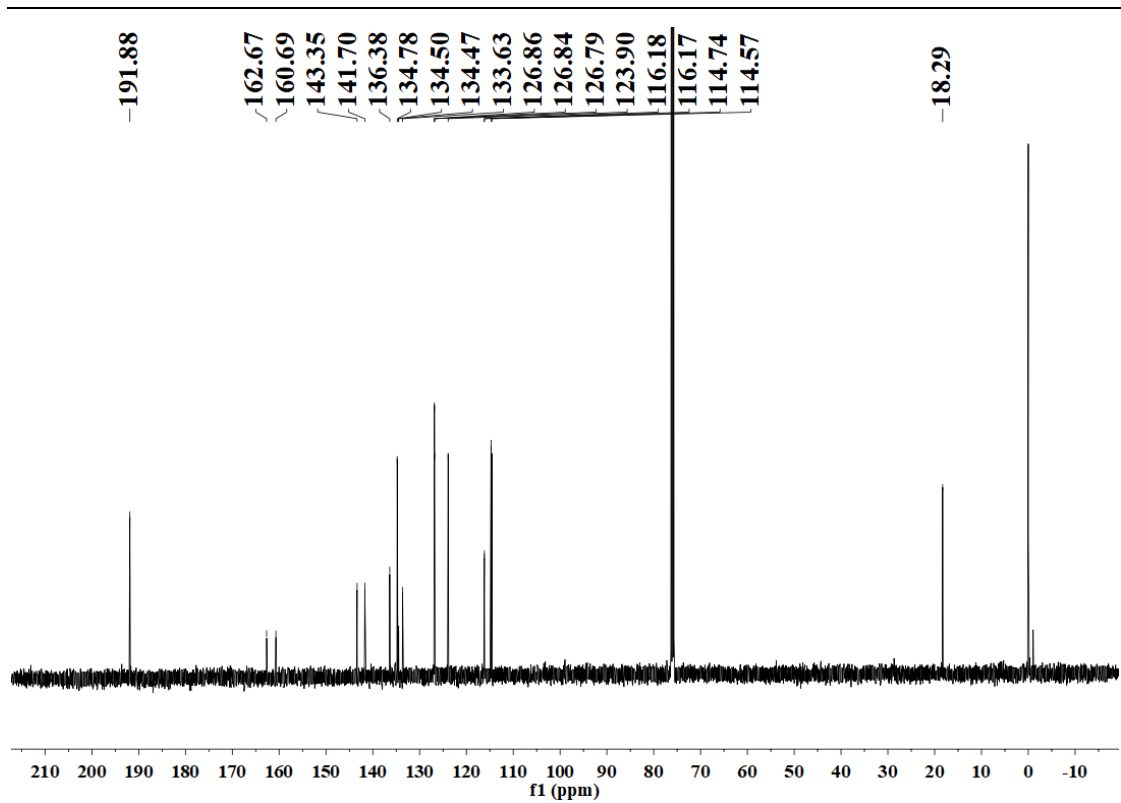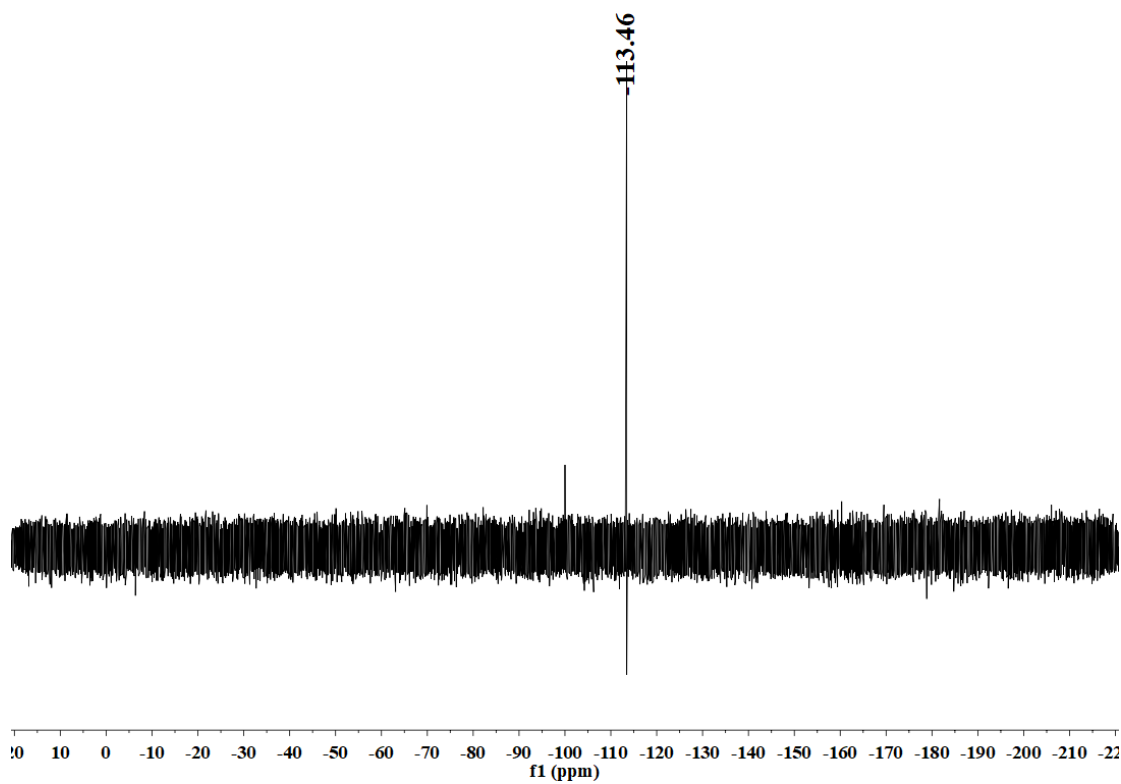

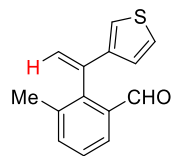

(1h)

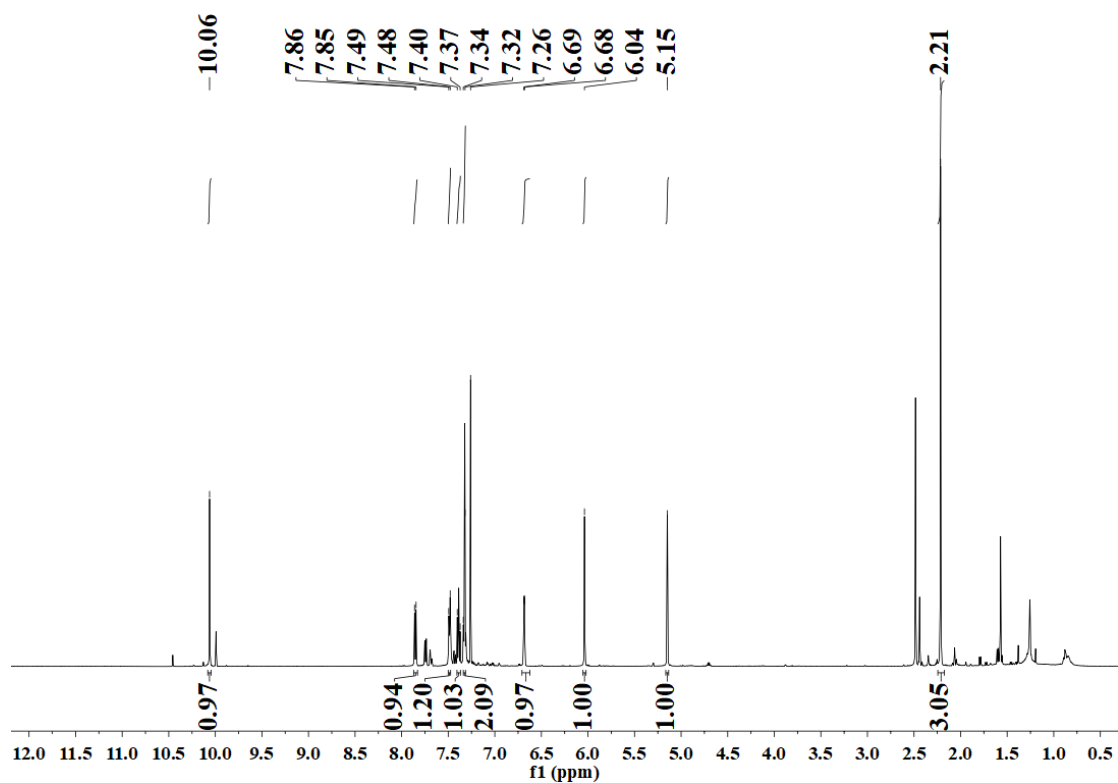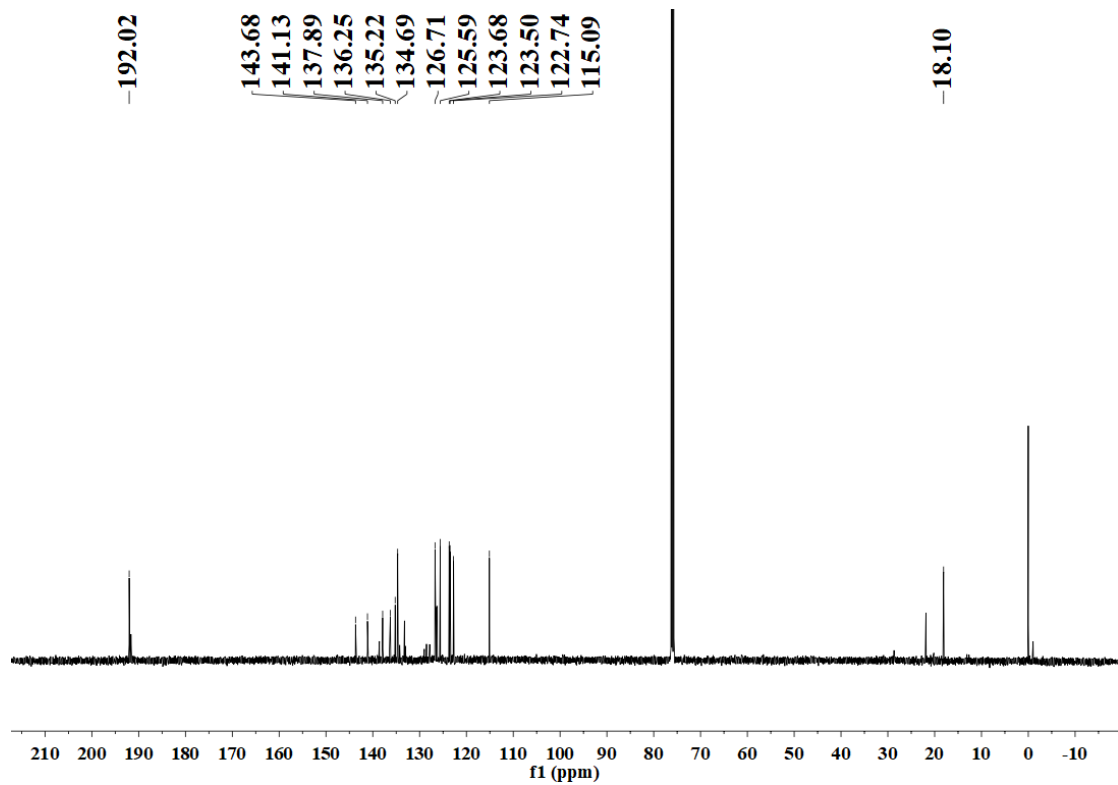

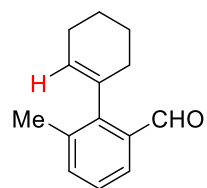

(ii)

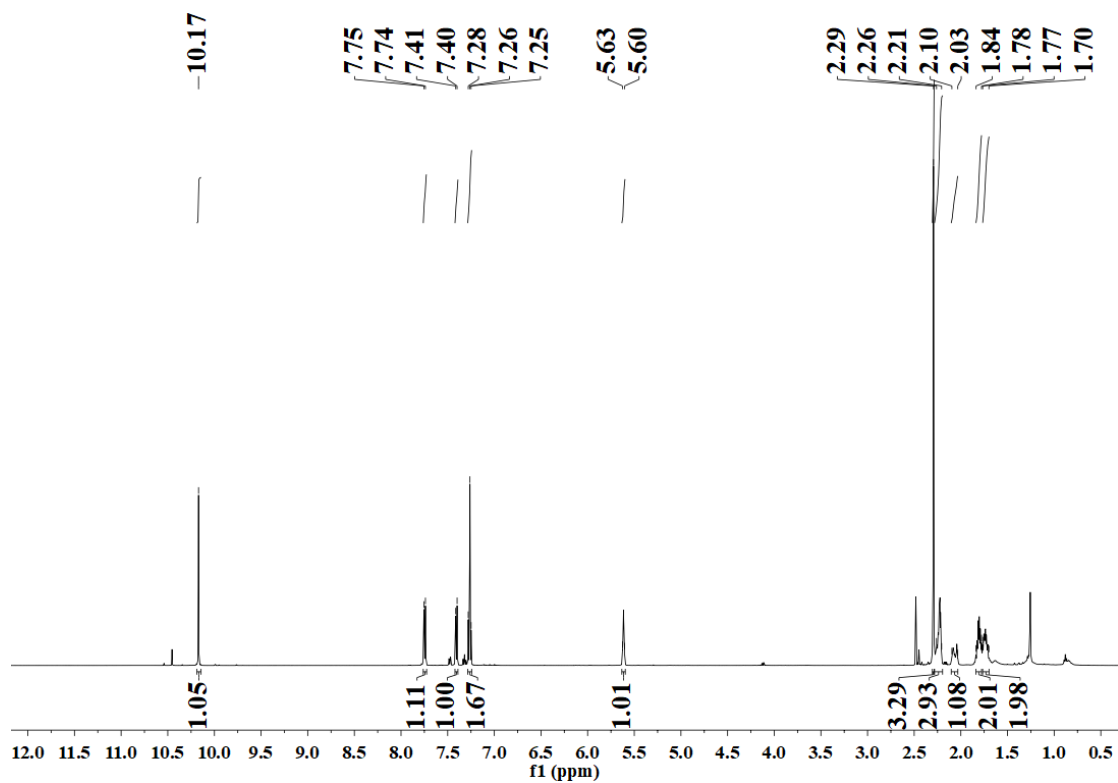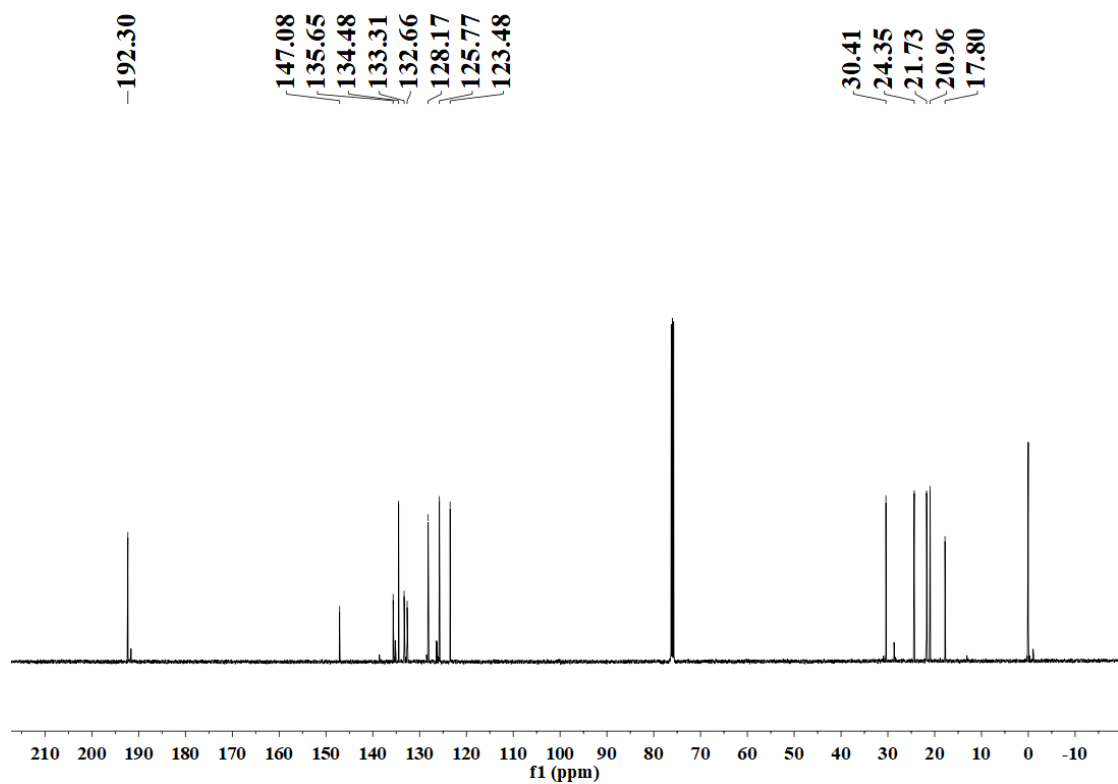

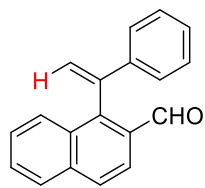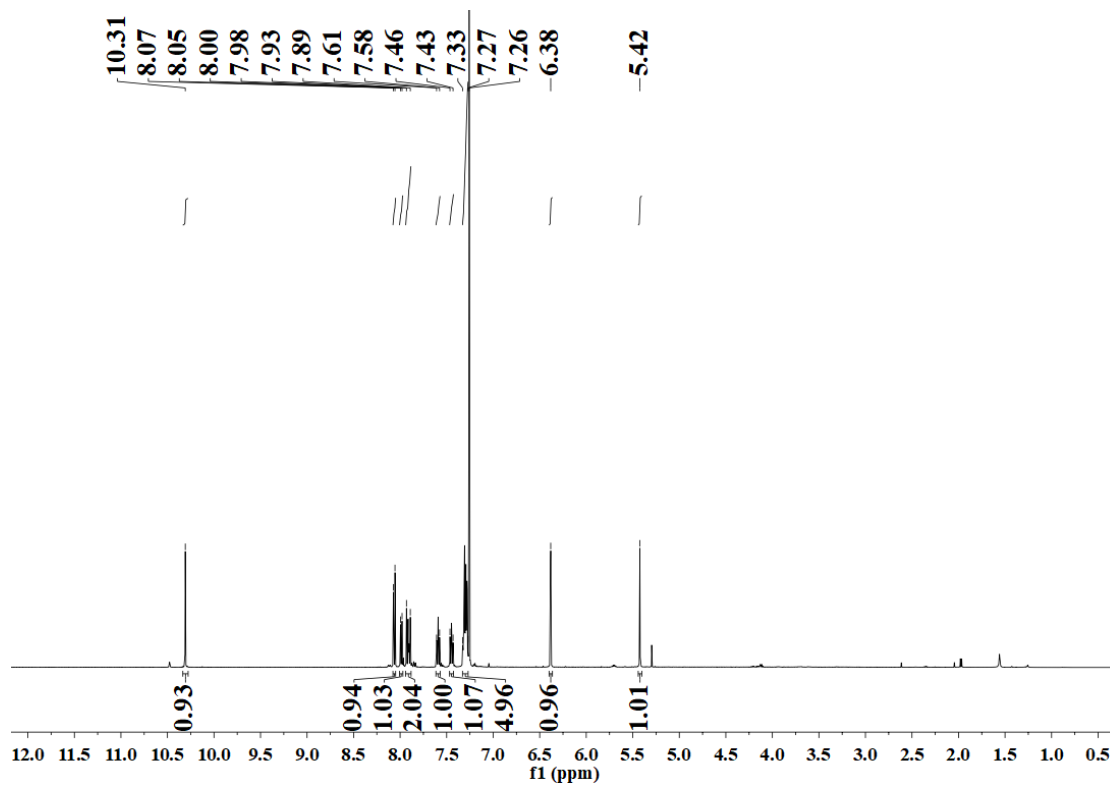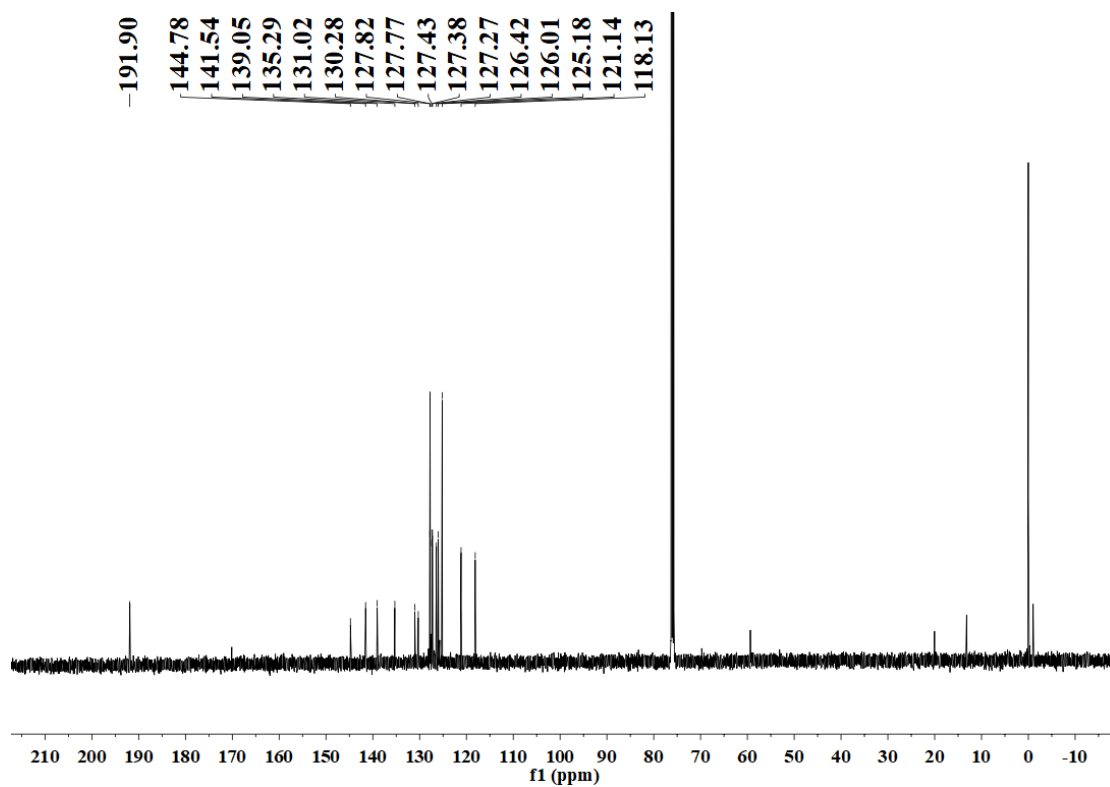

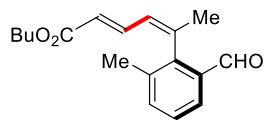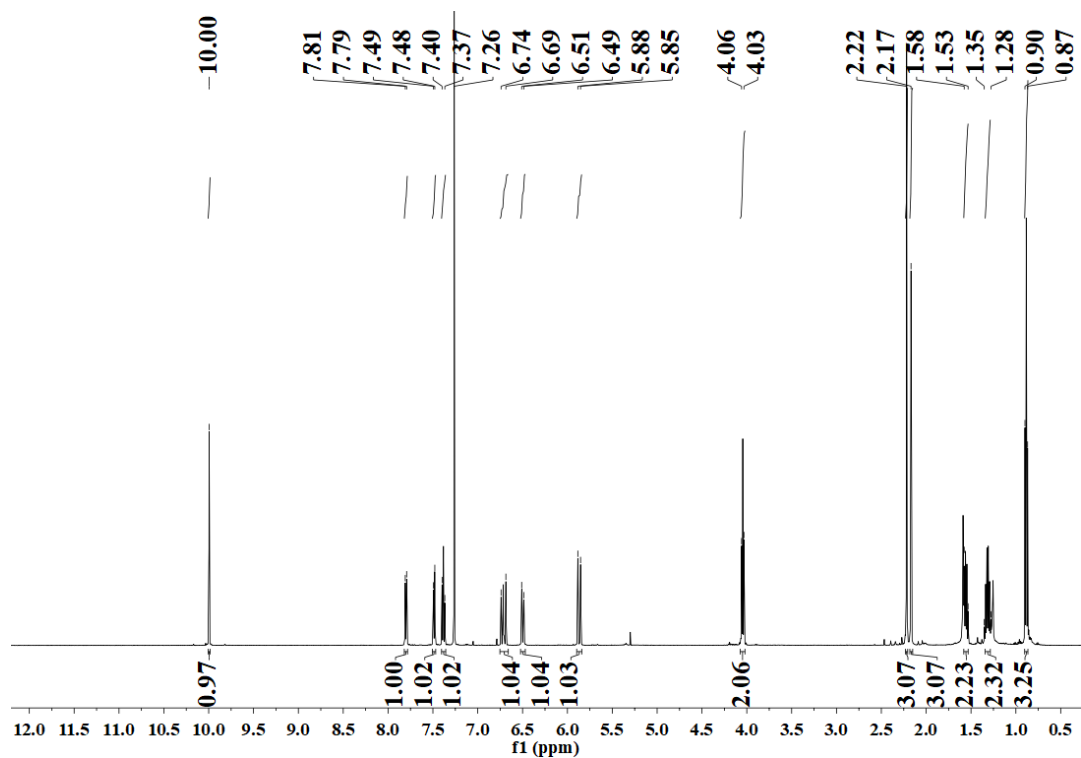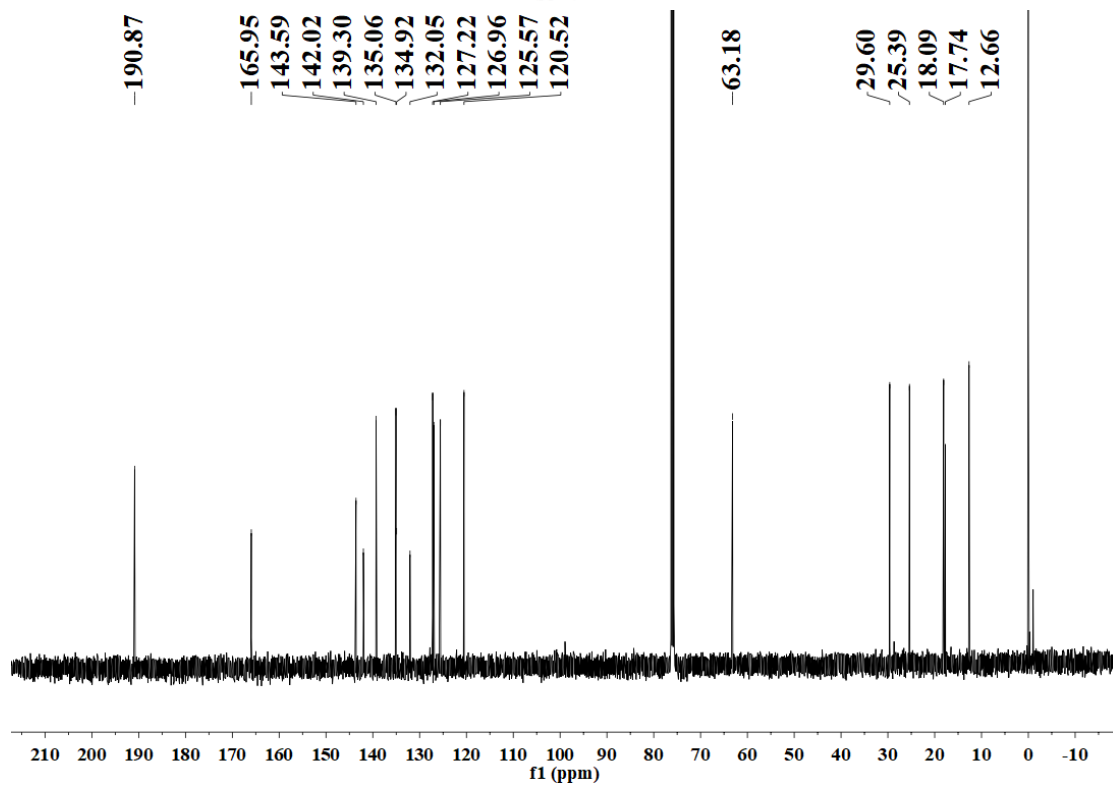



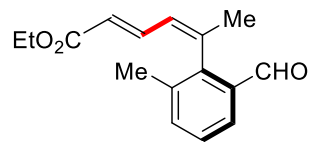

(3b)

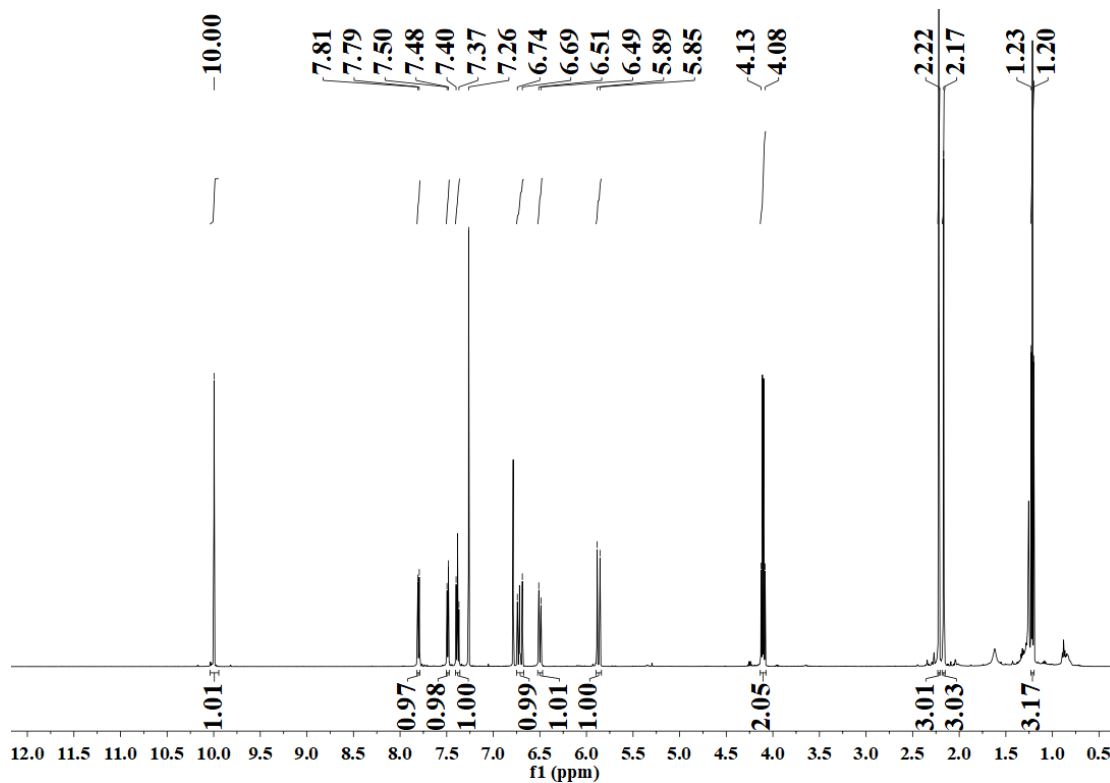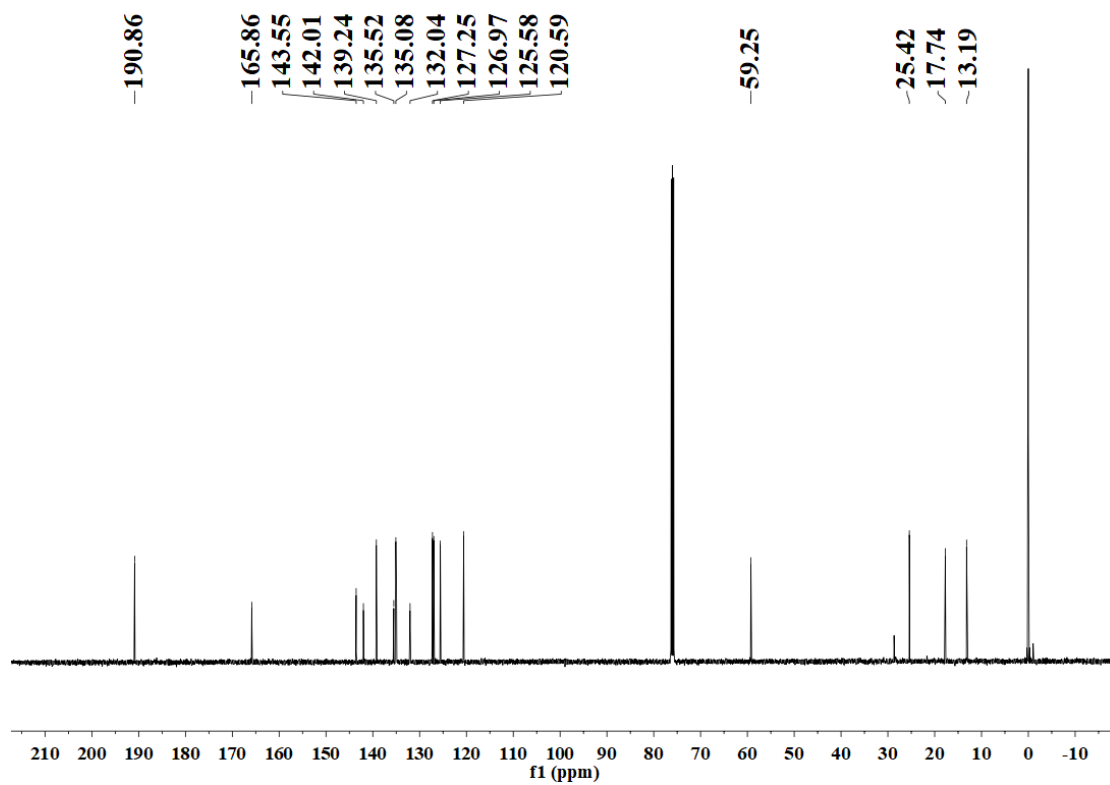

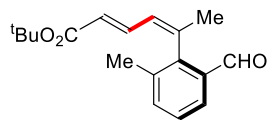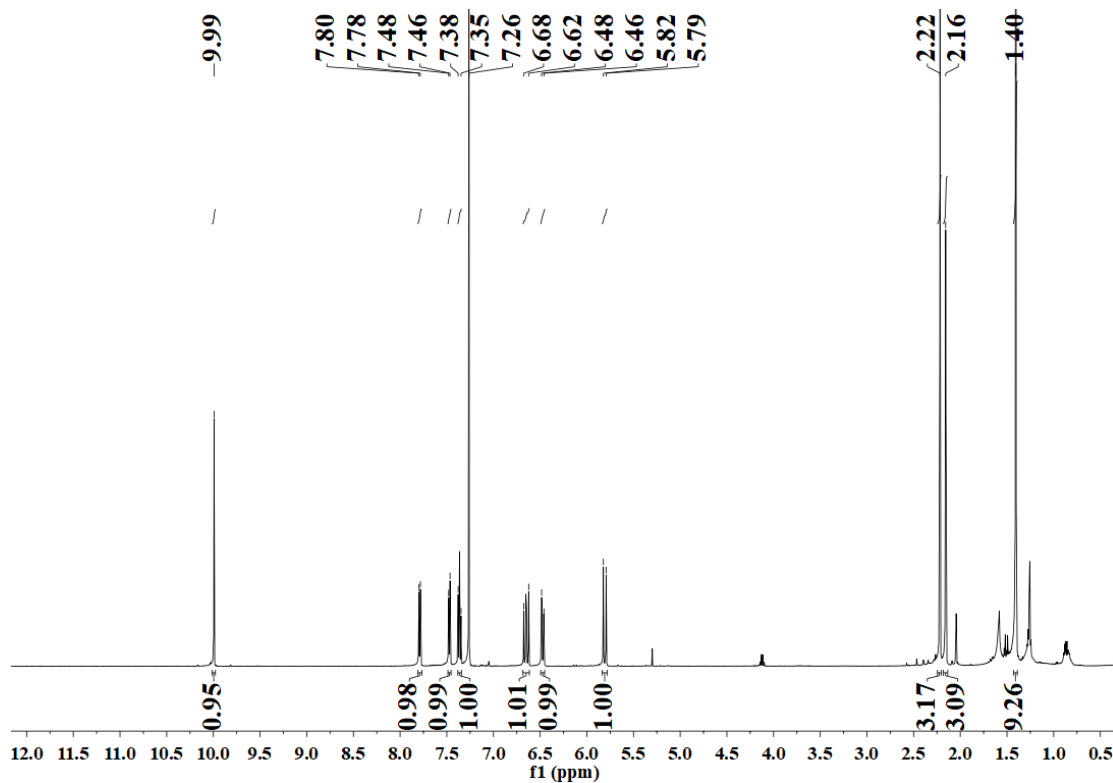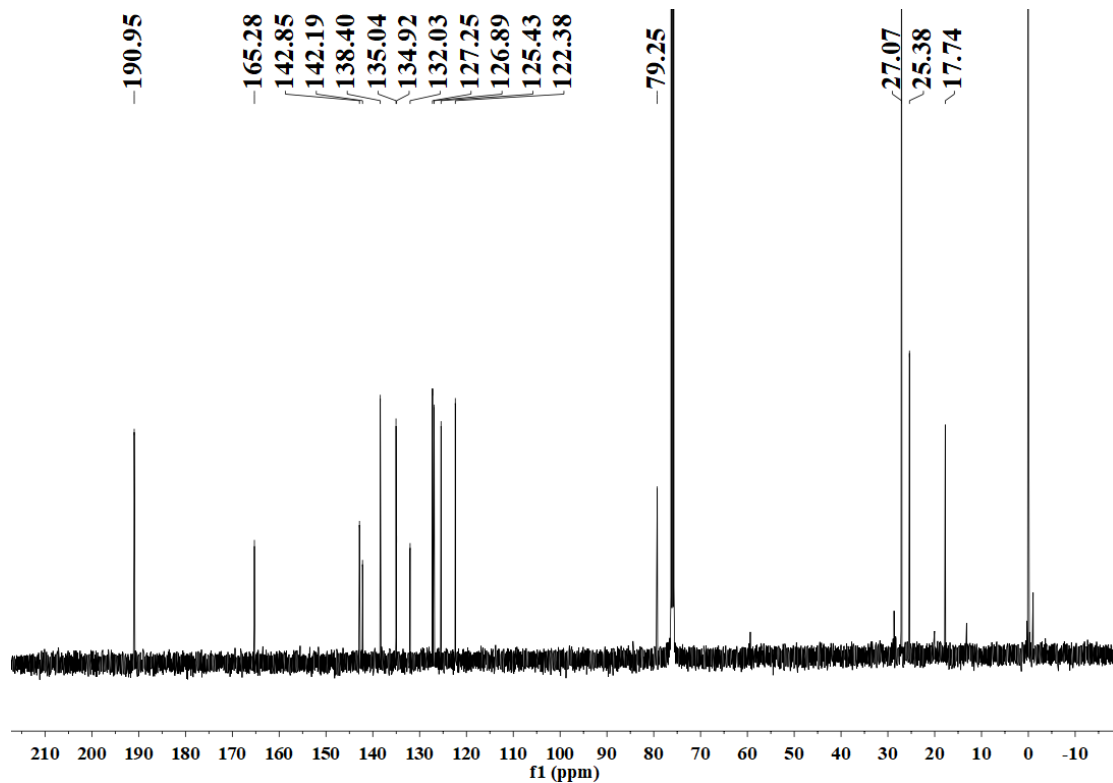

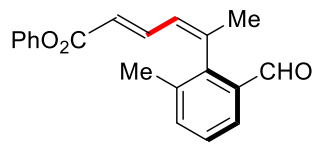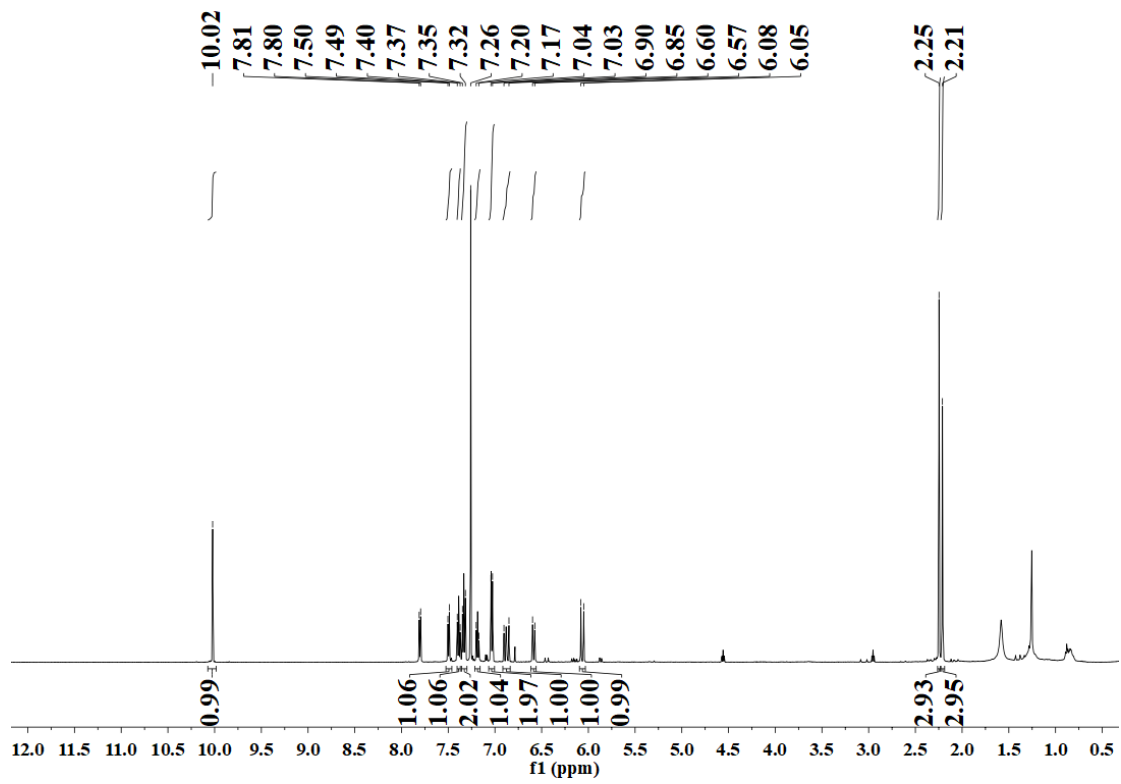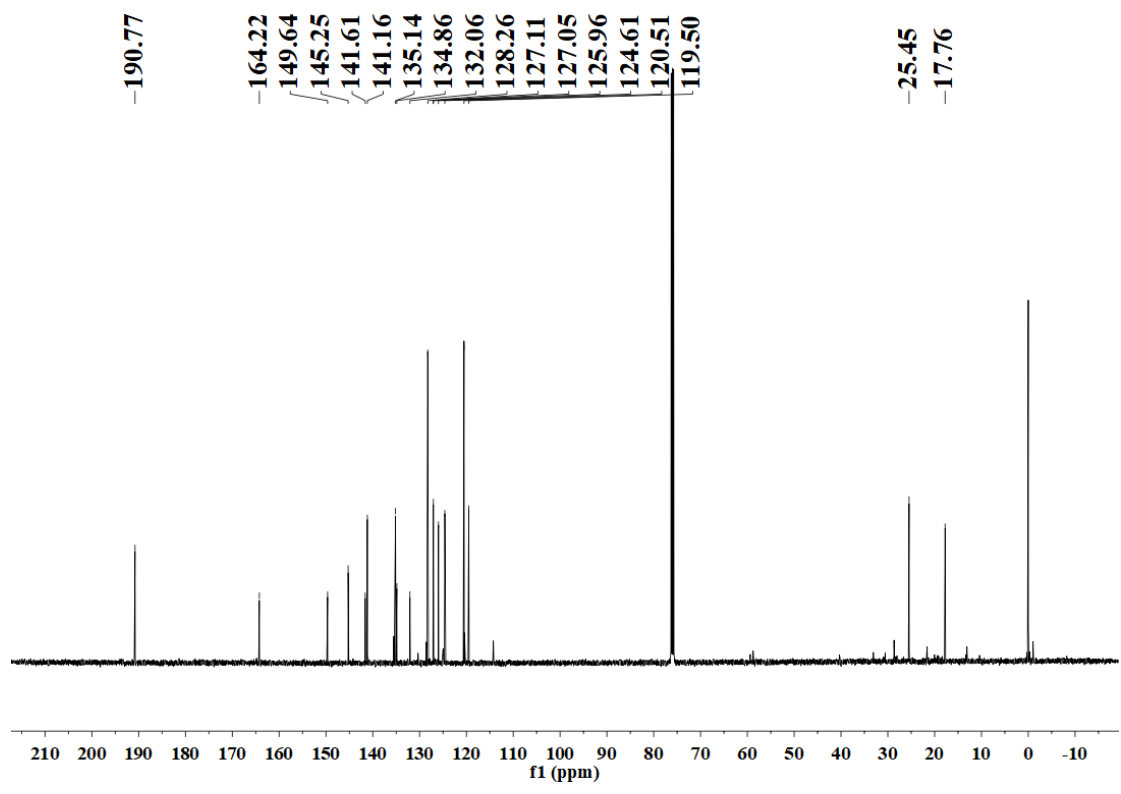

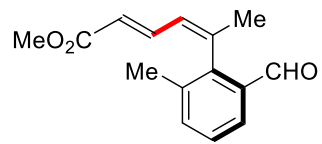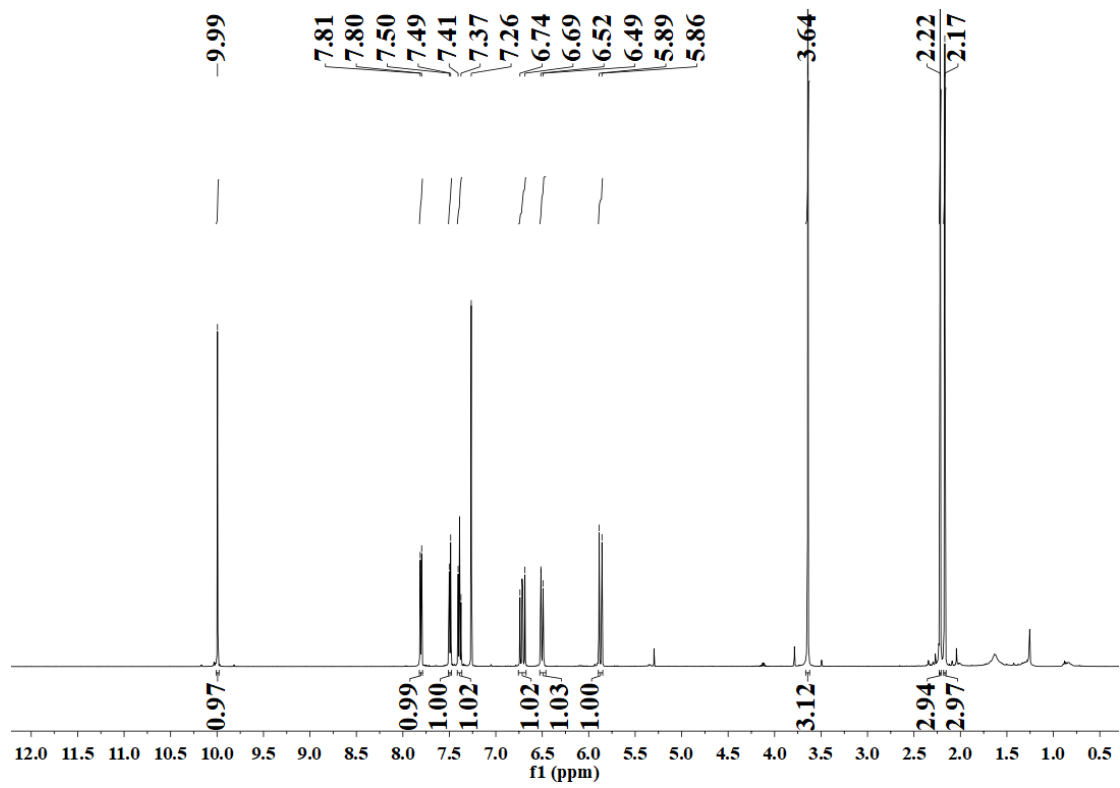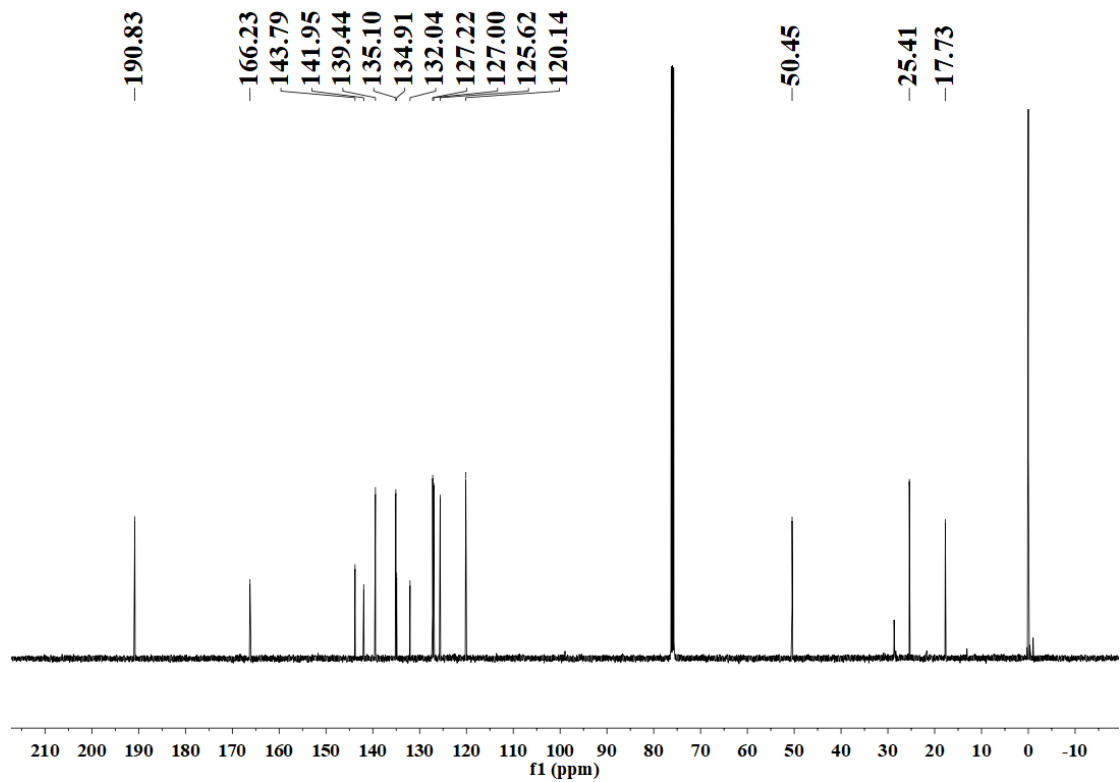

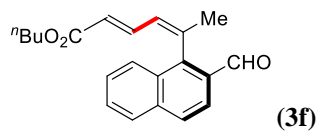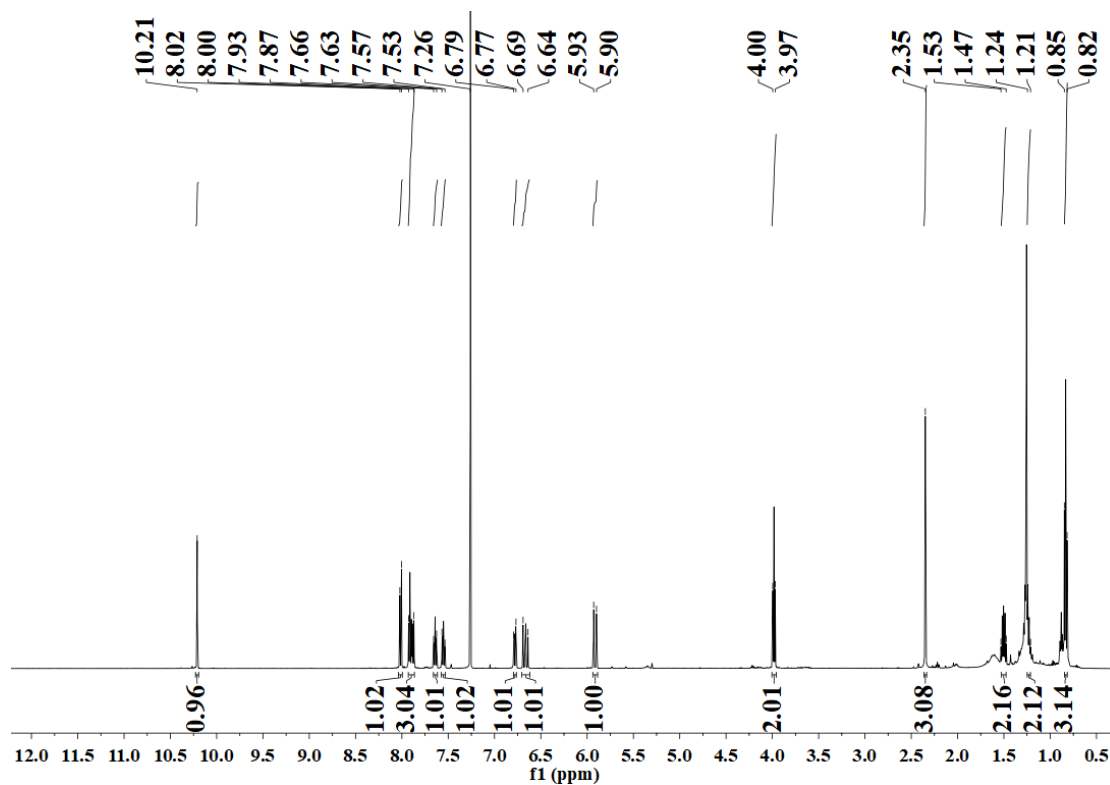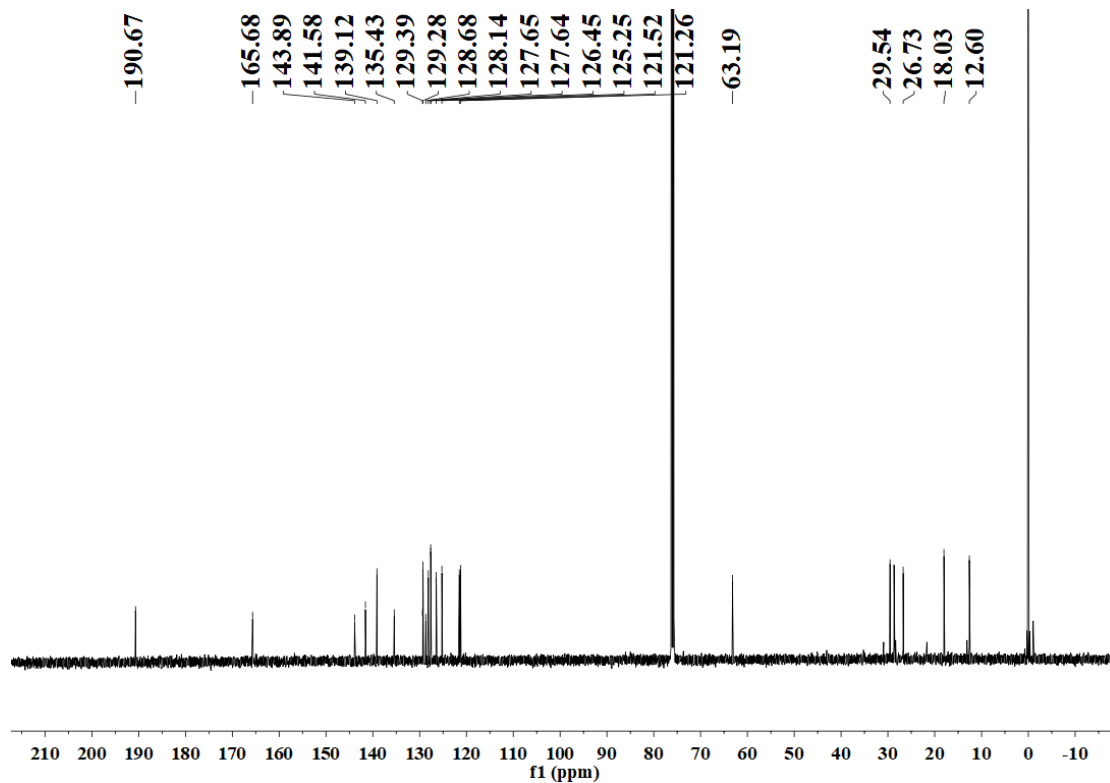

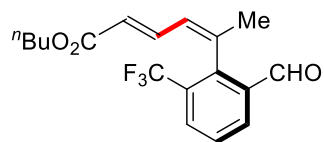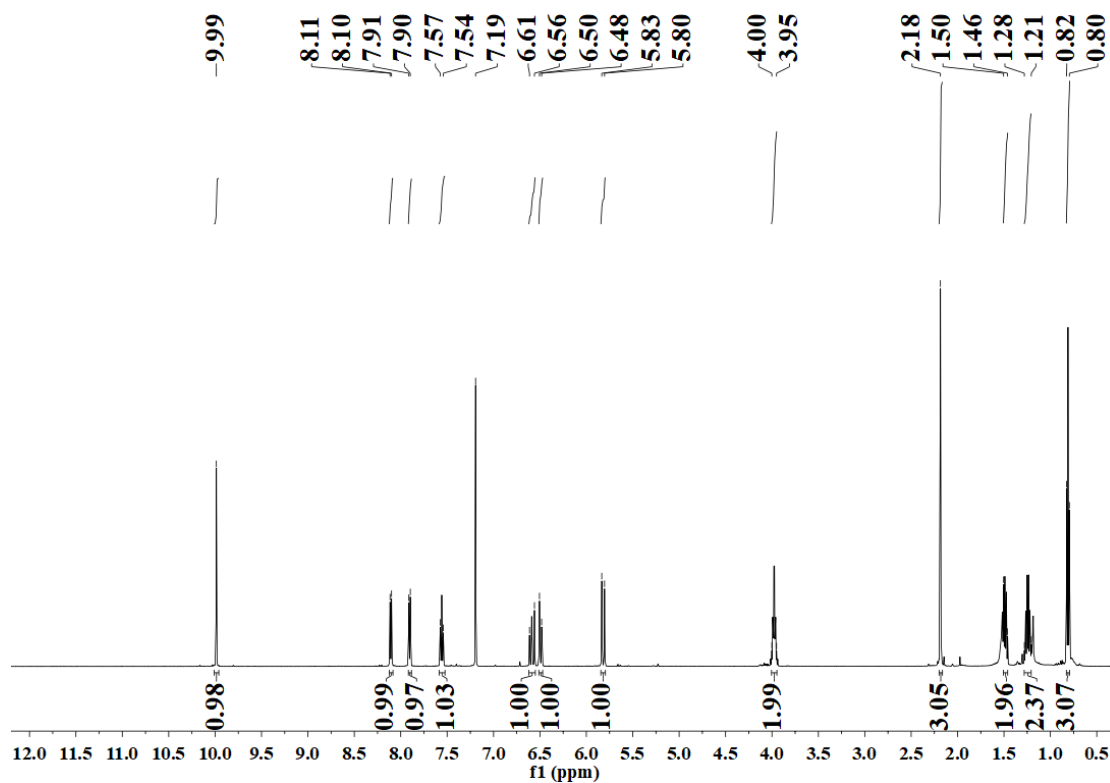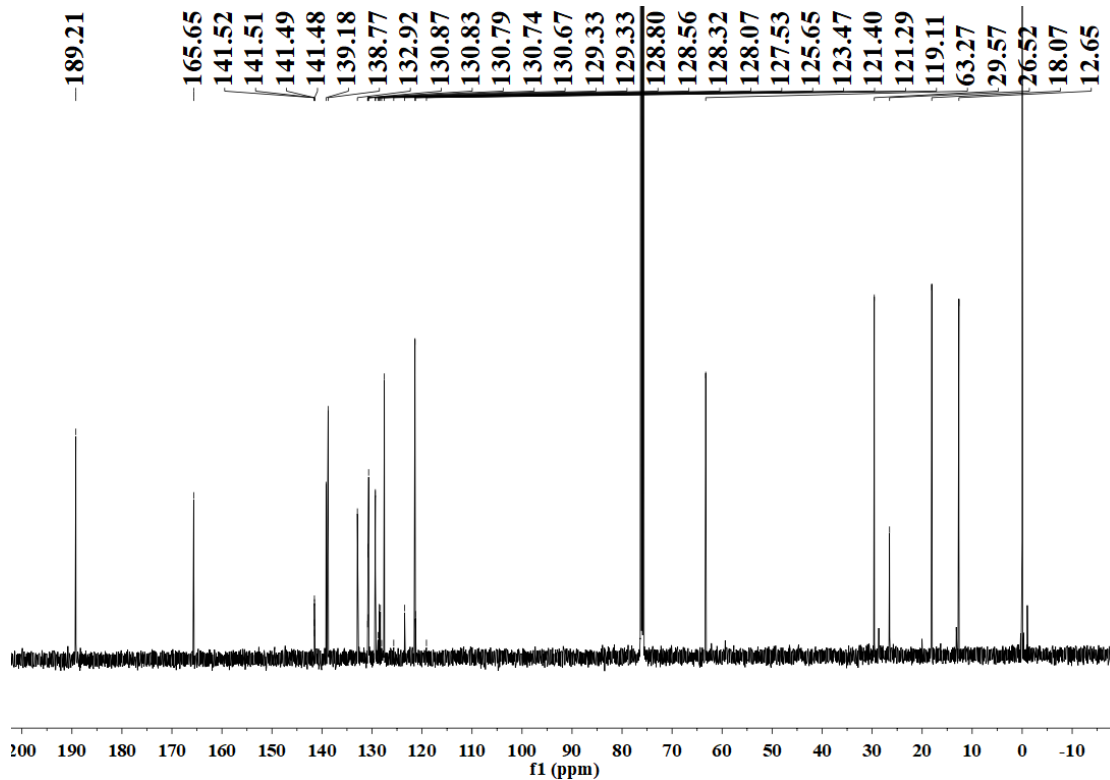

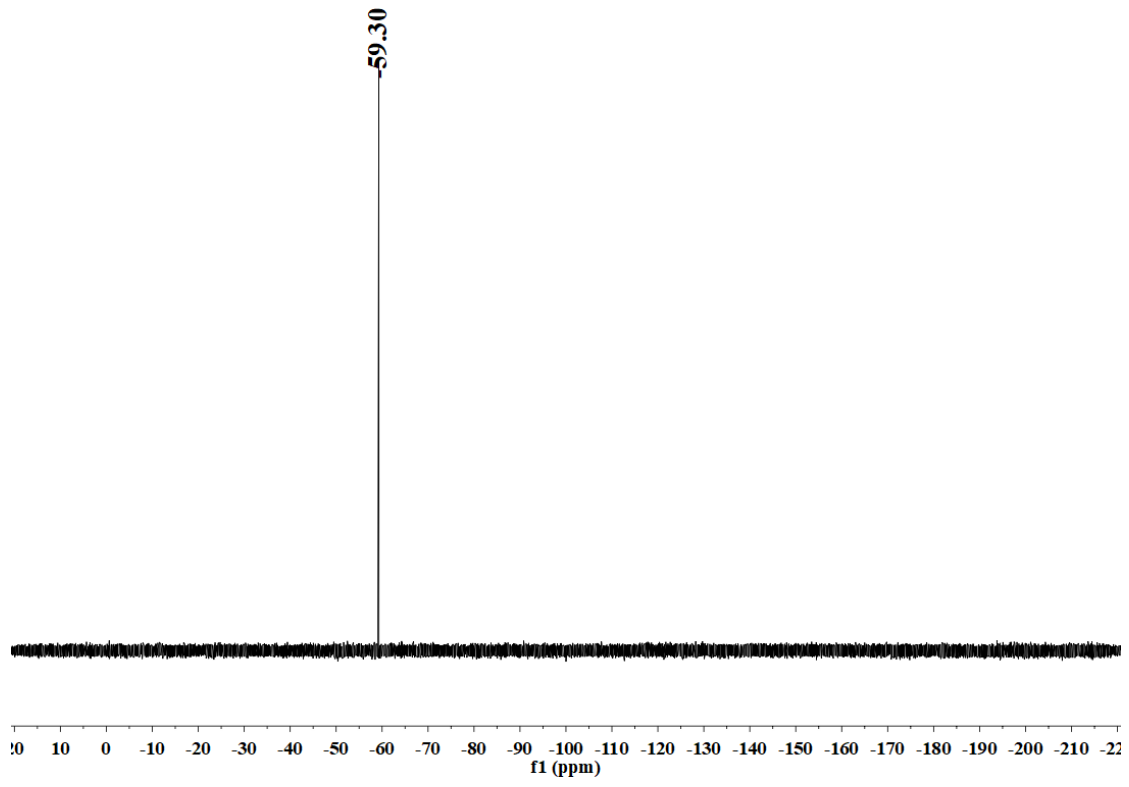

NOESYPSHW CDC13 E:\\ CCY 13

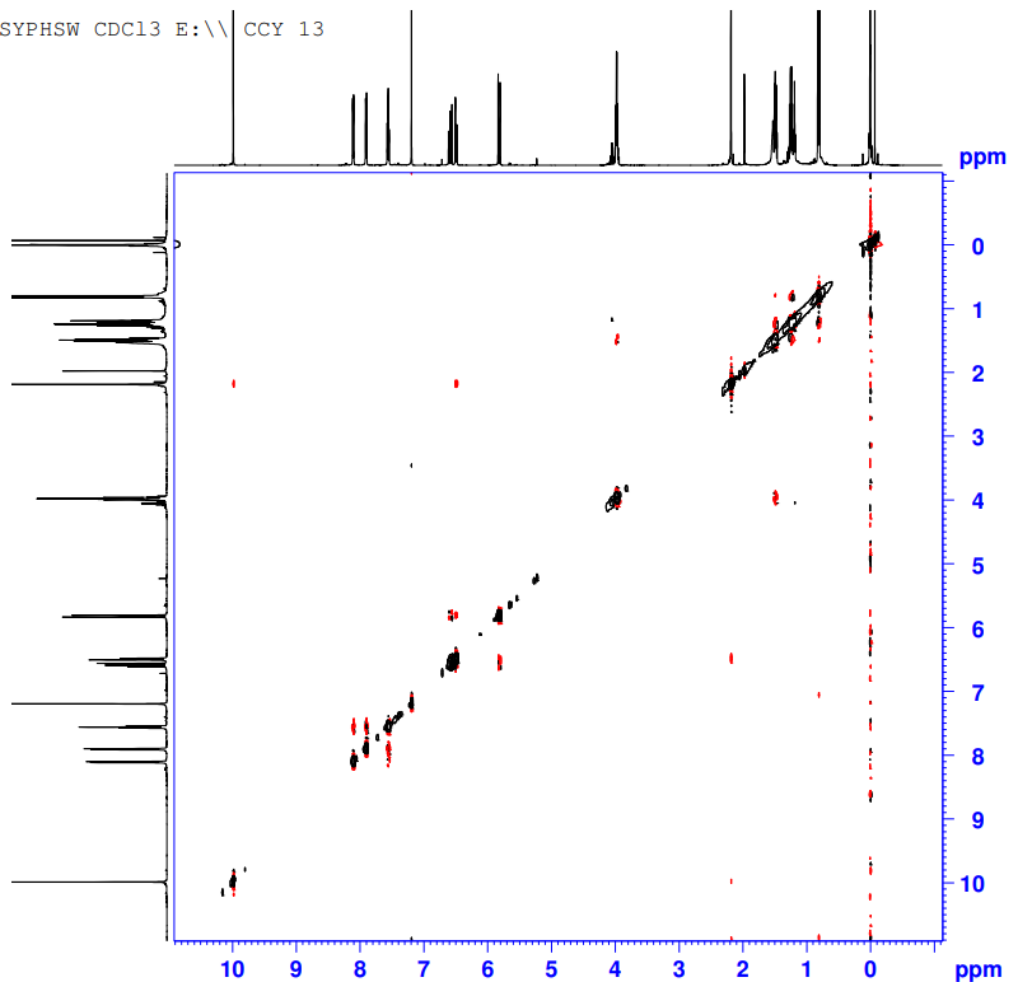

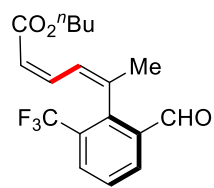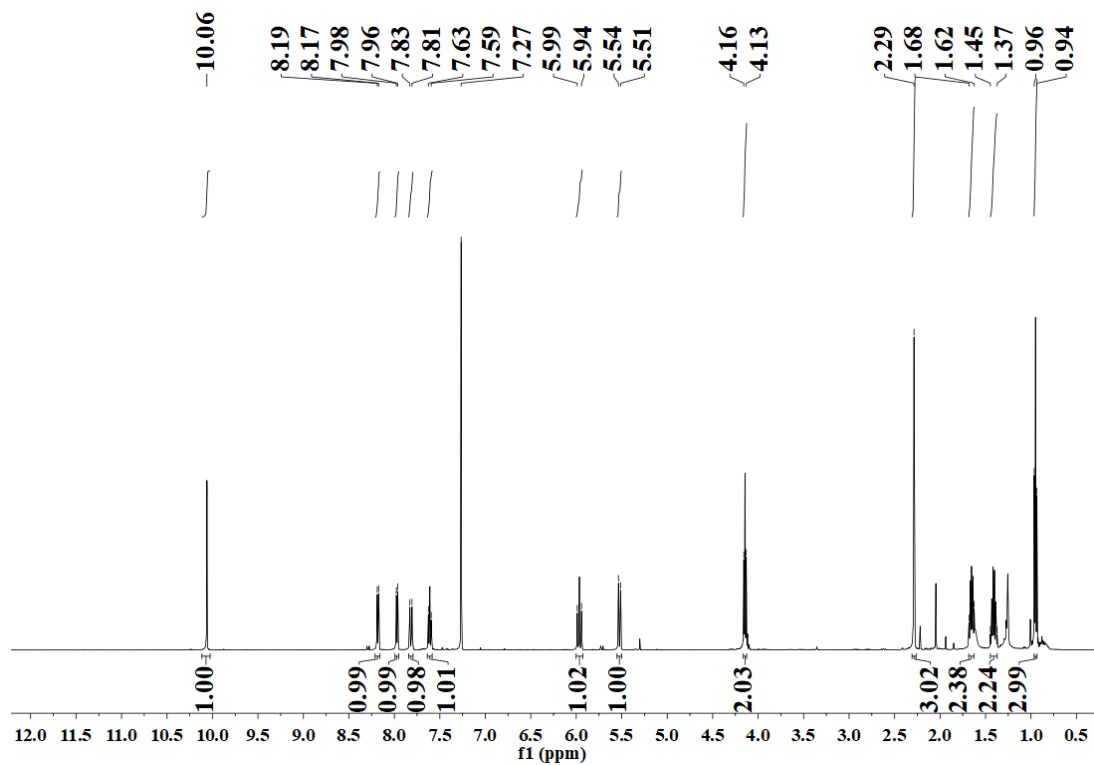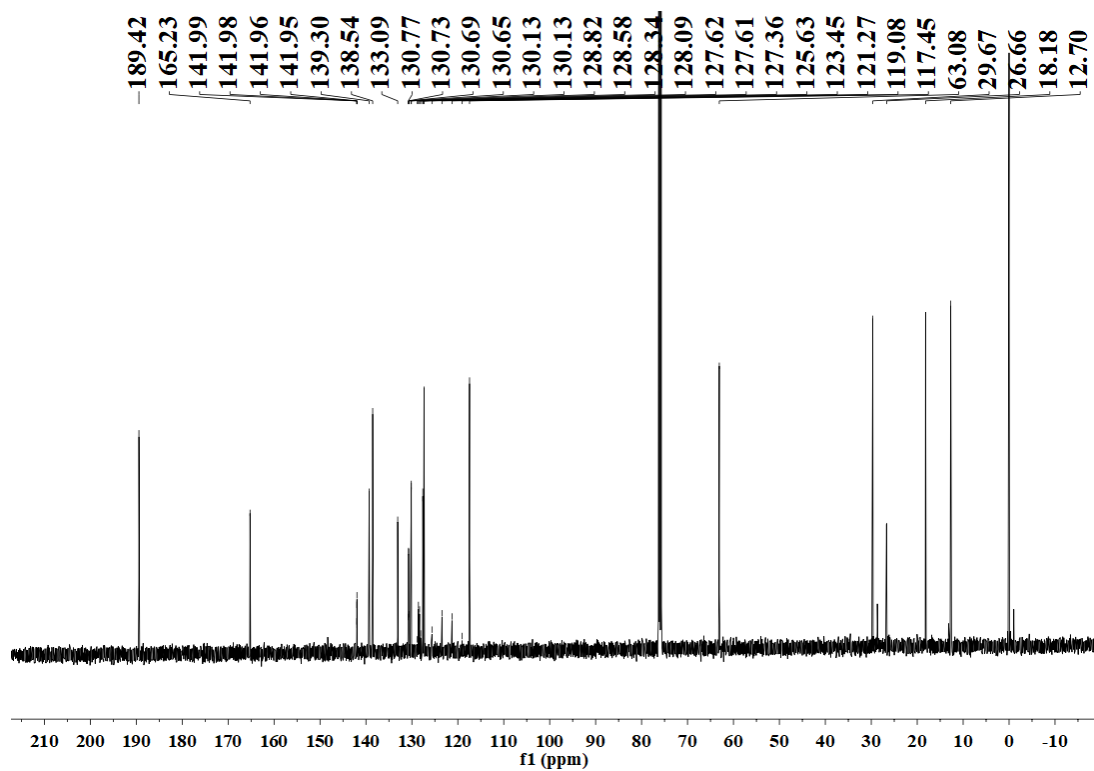



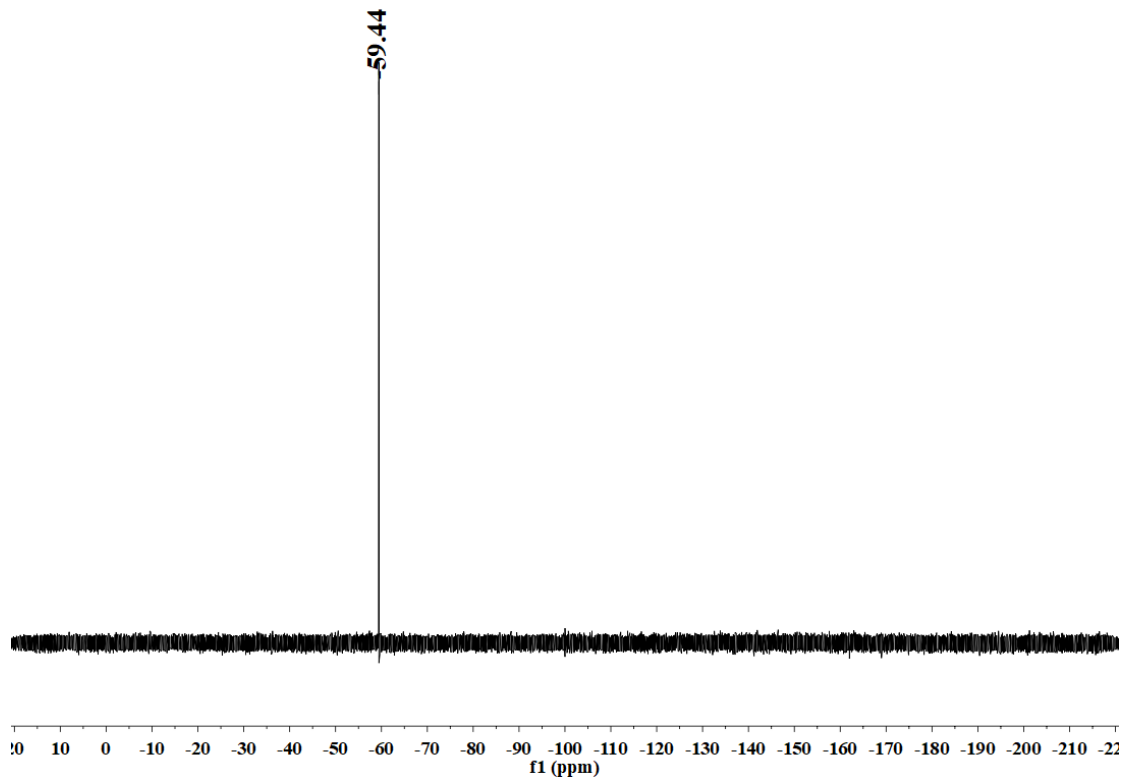

NOESYPHSW CDC13 E:\\ CCY 31

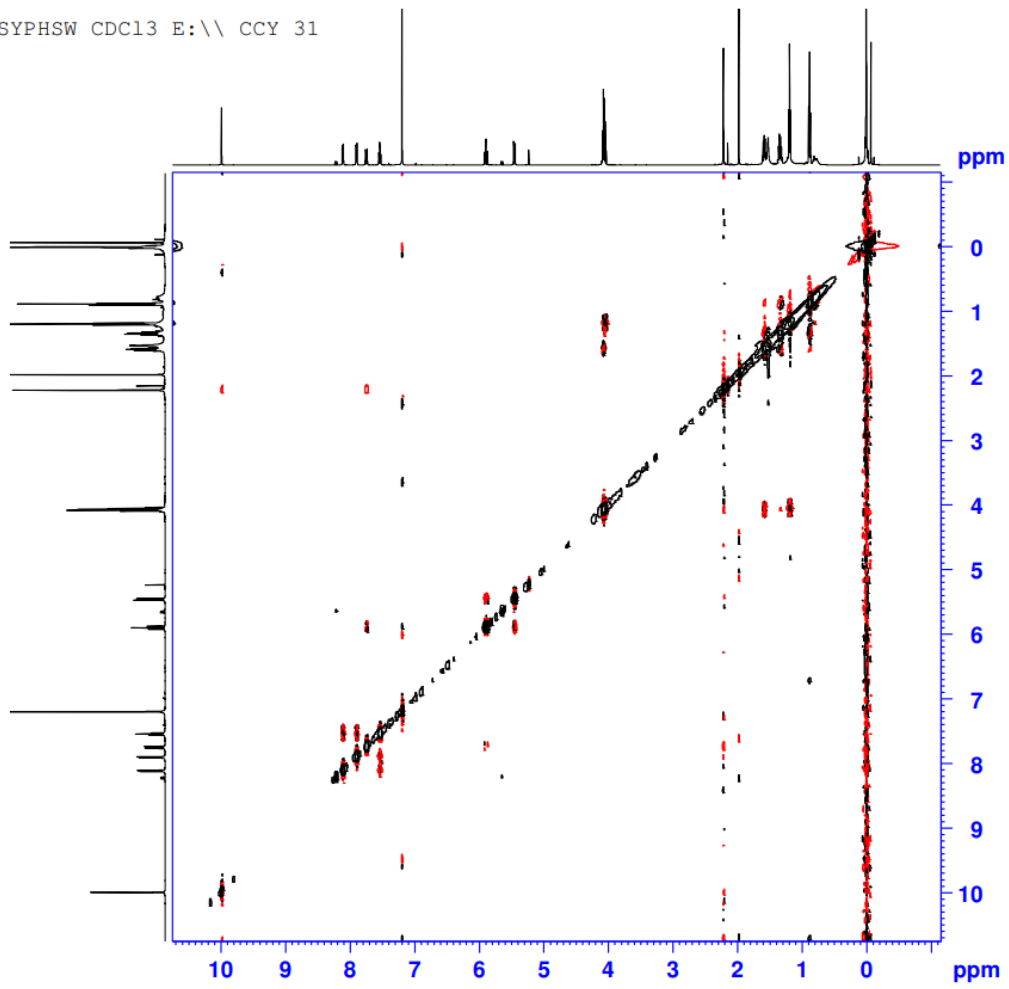

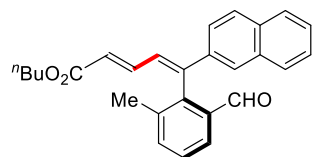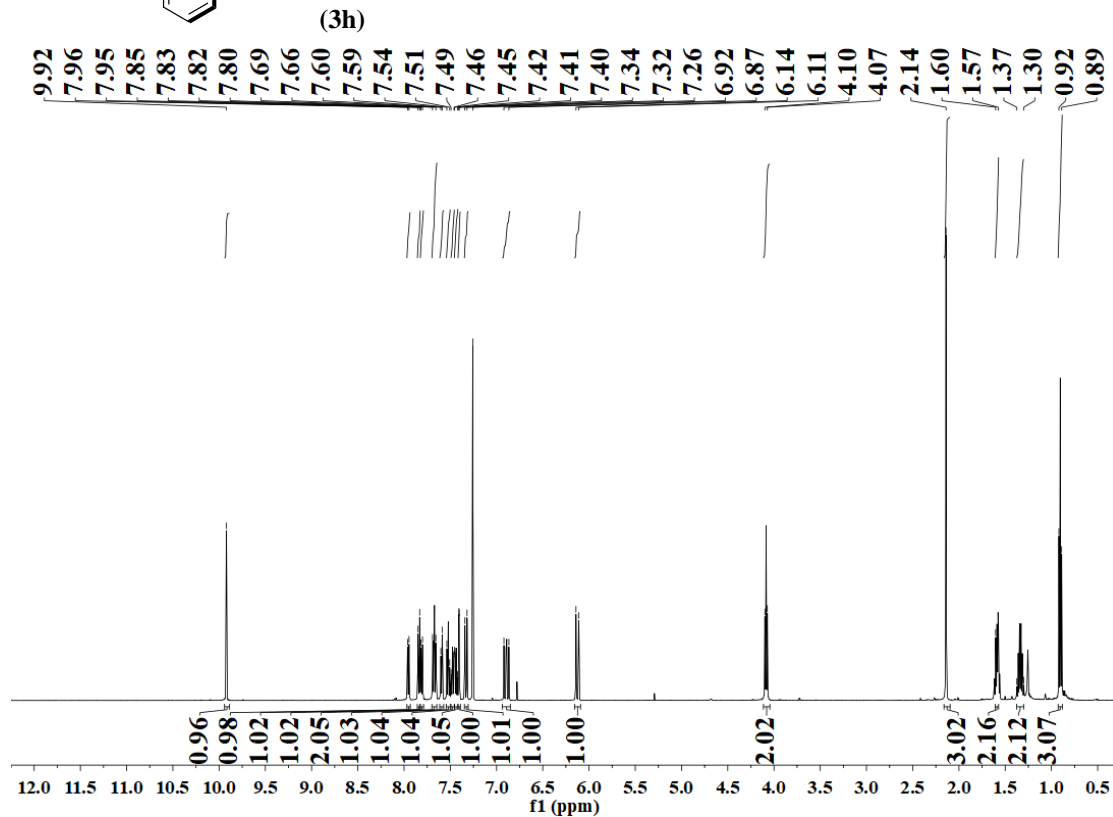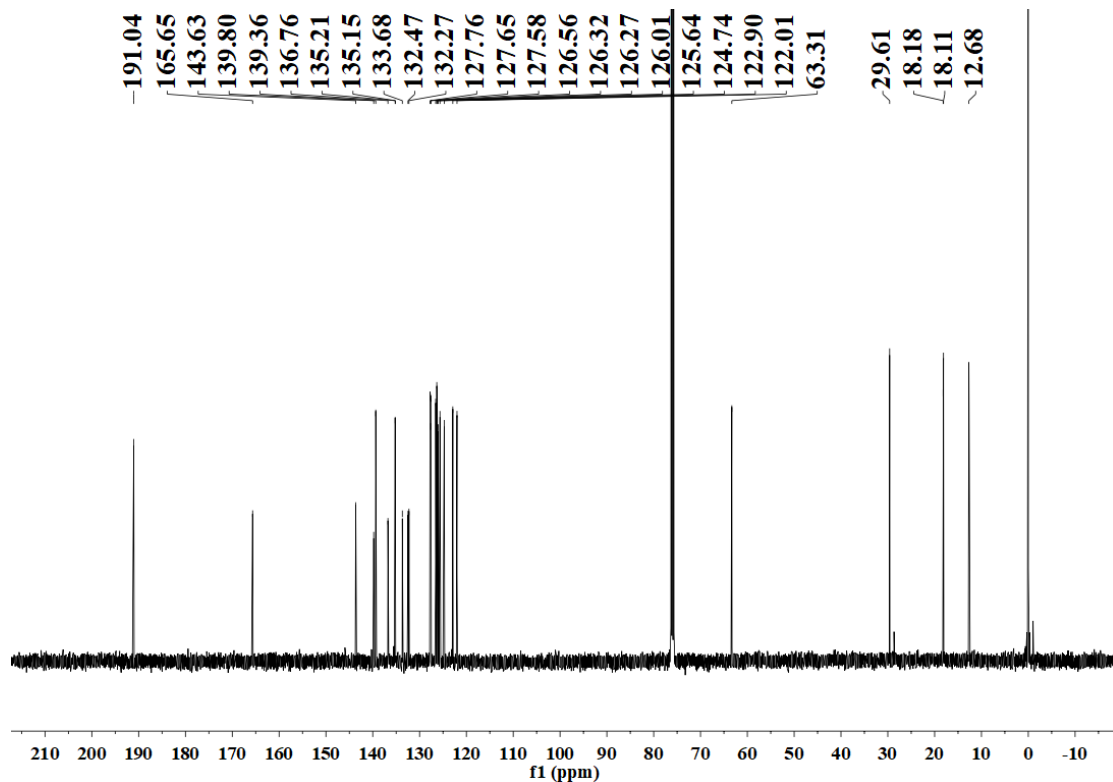

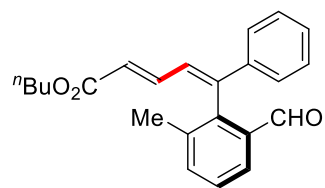

(3i)

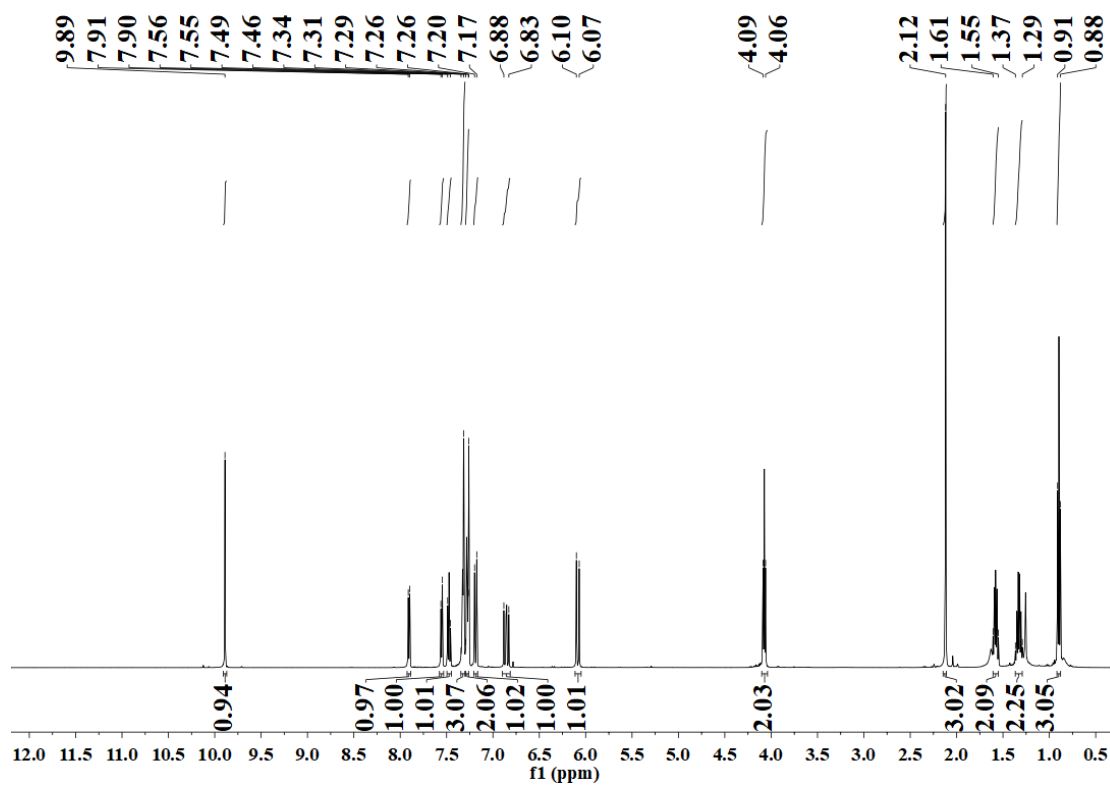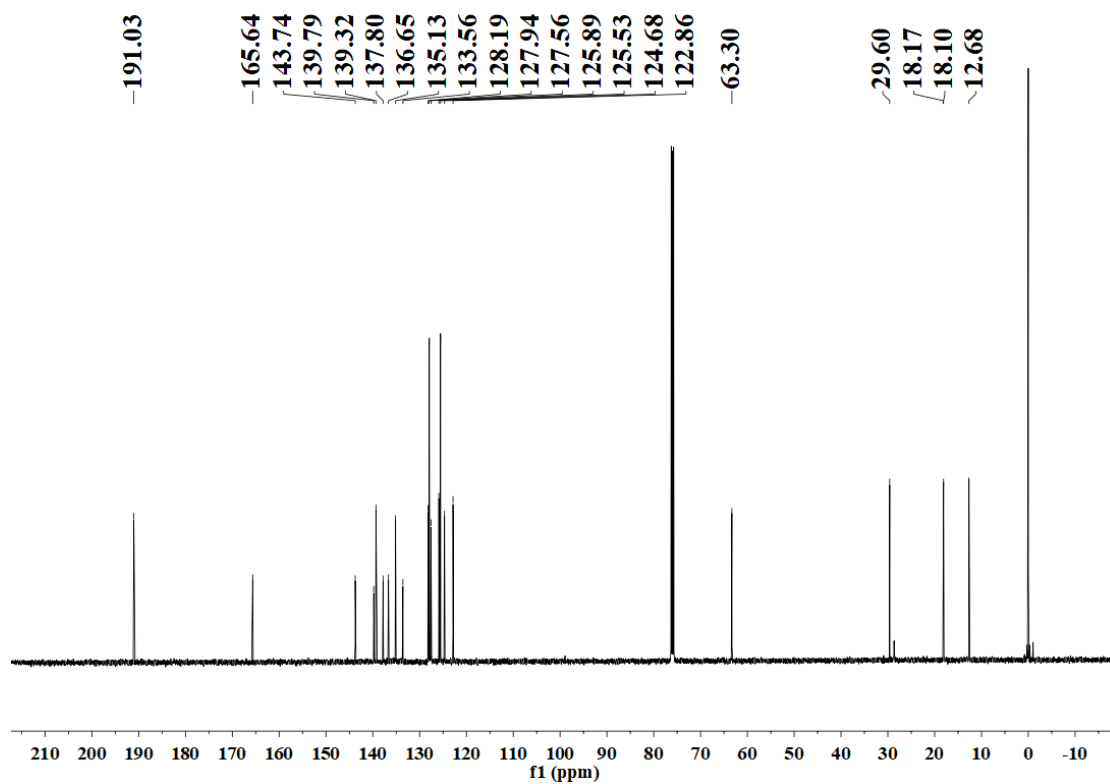

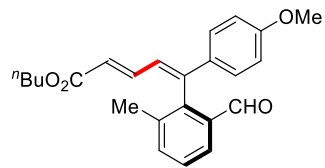

(3j)

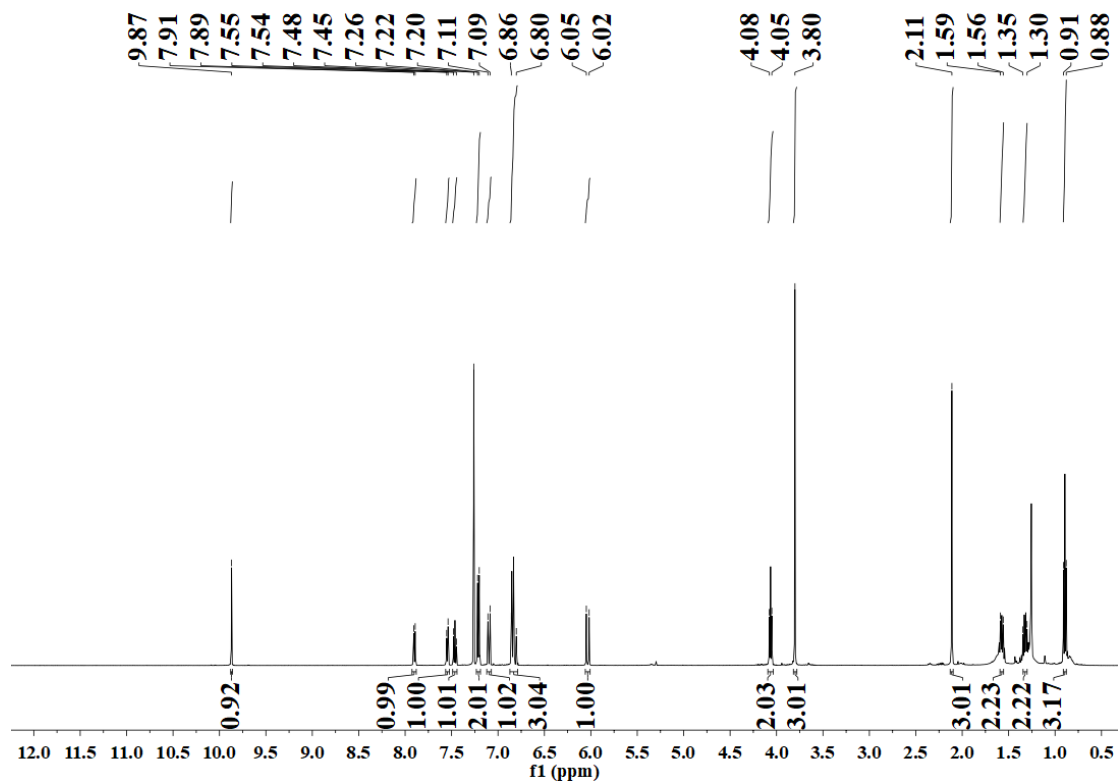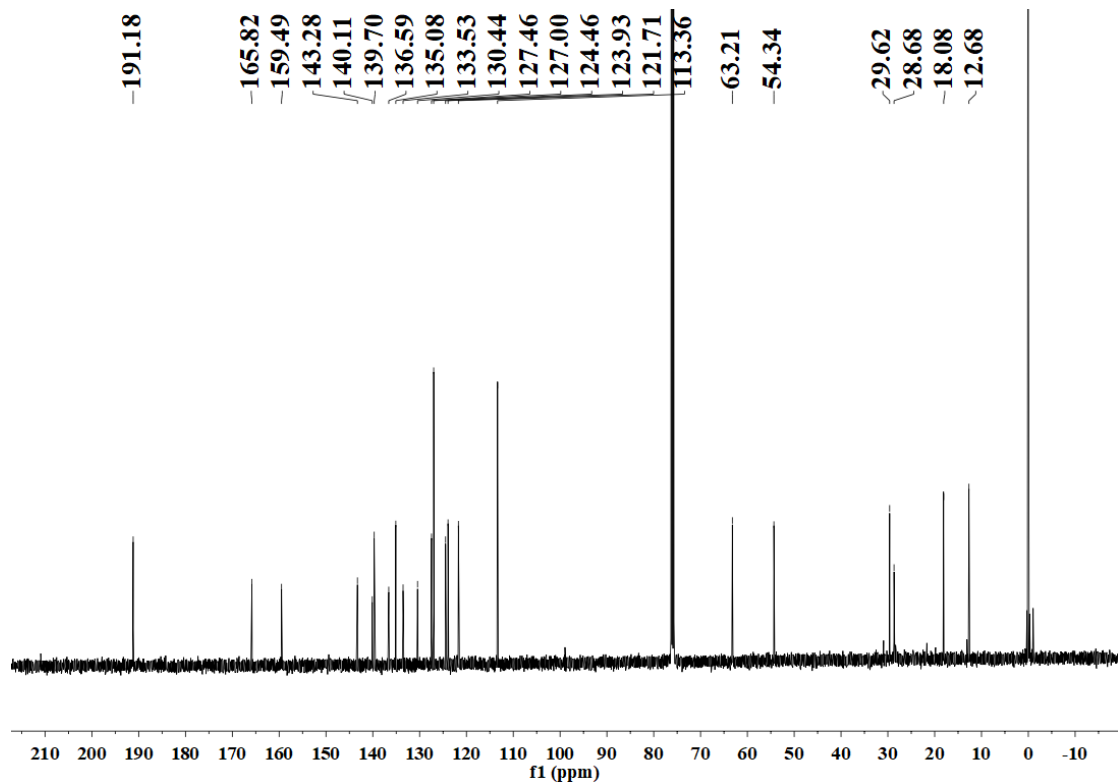

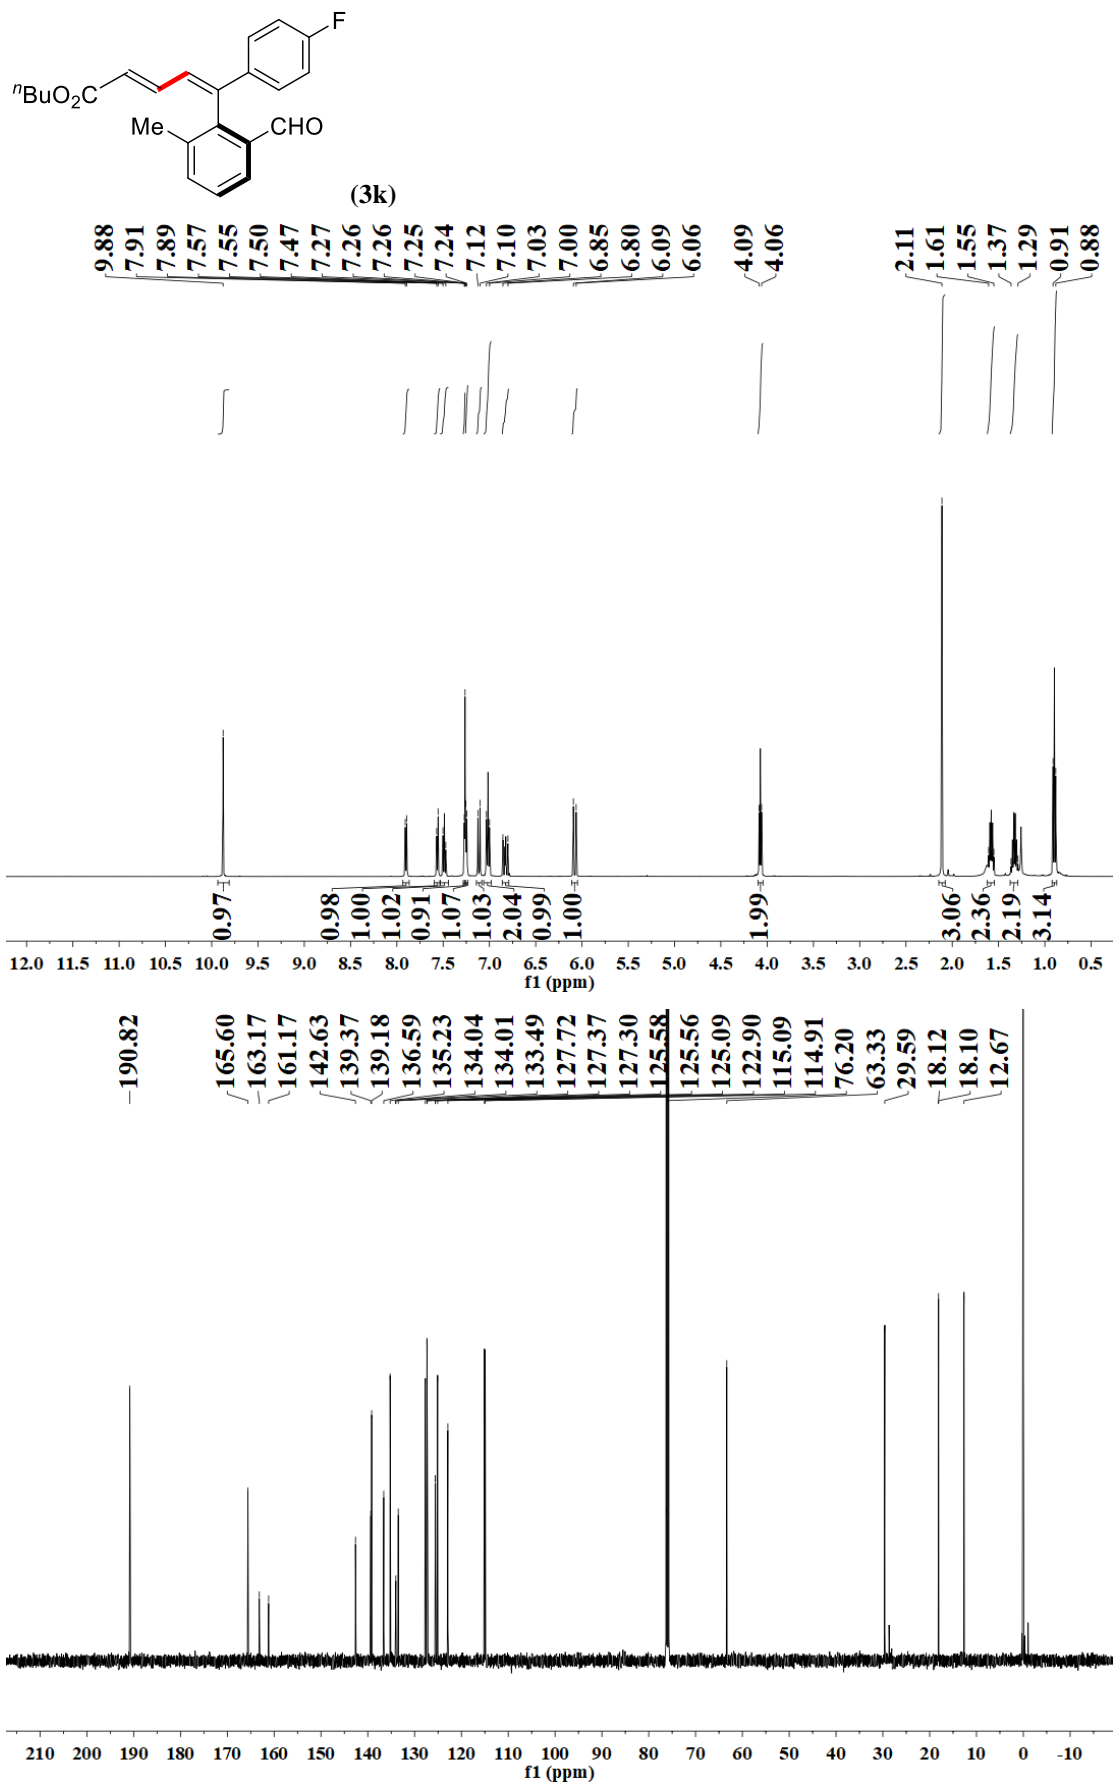

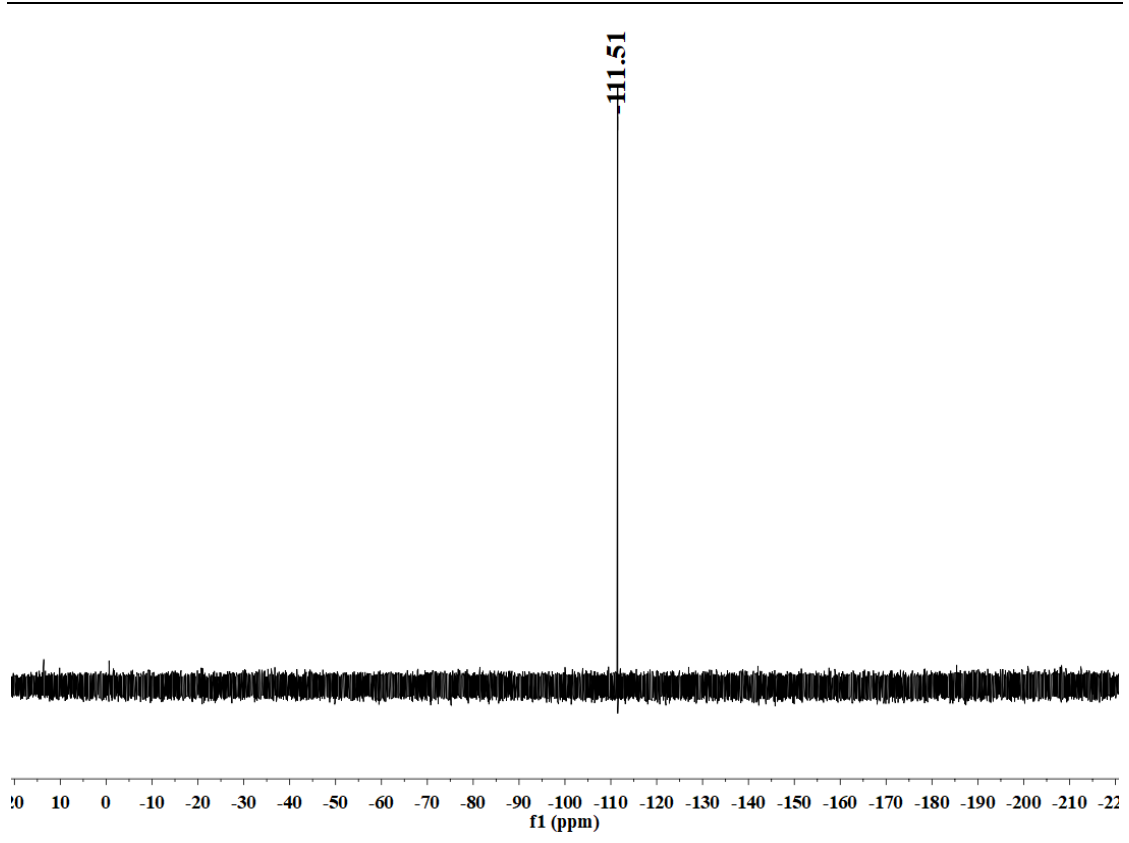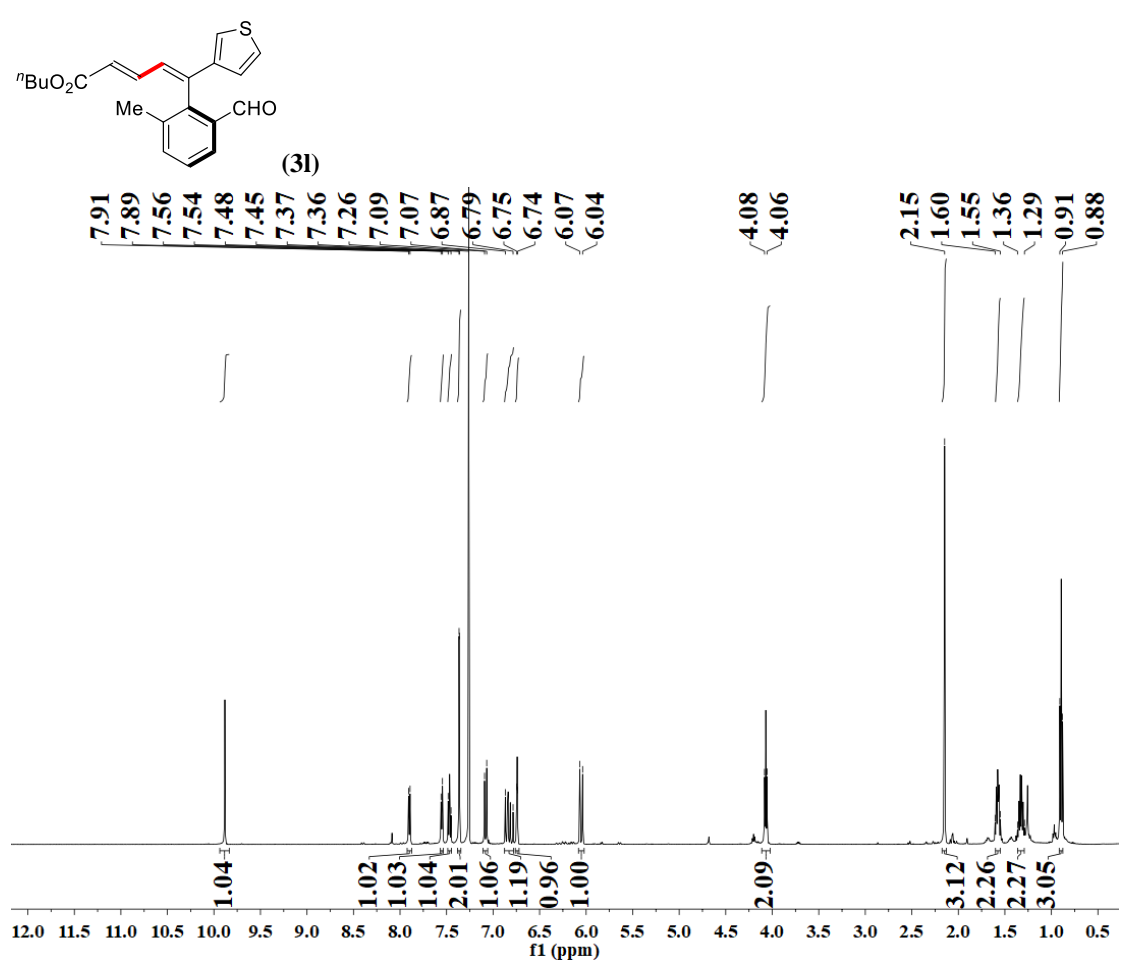

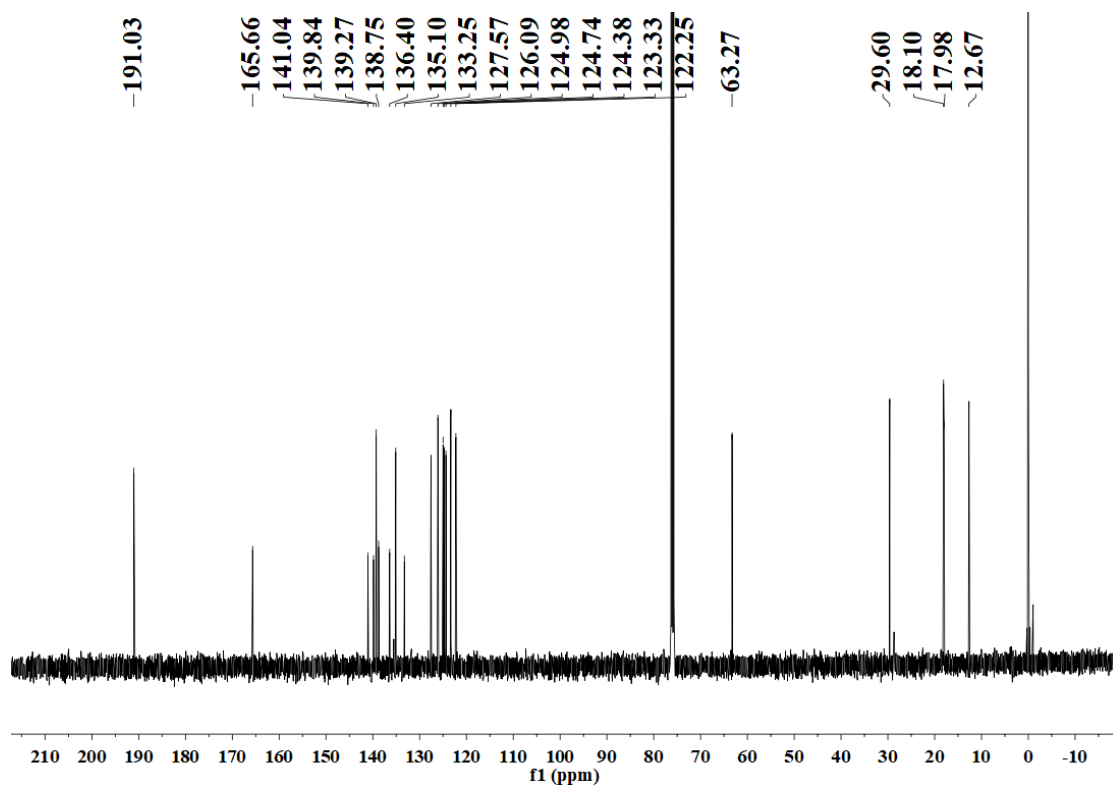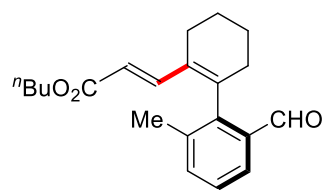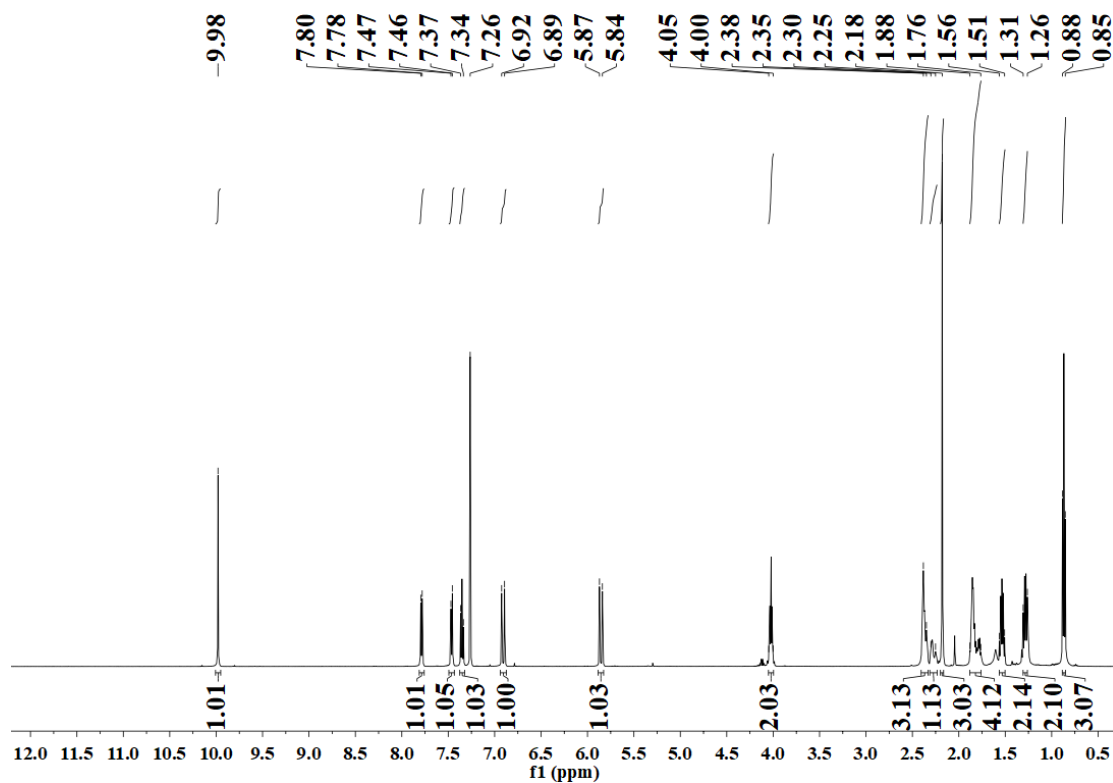

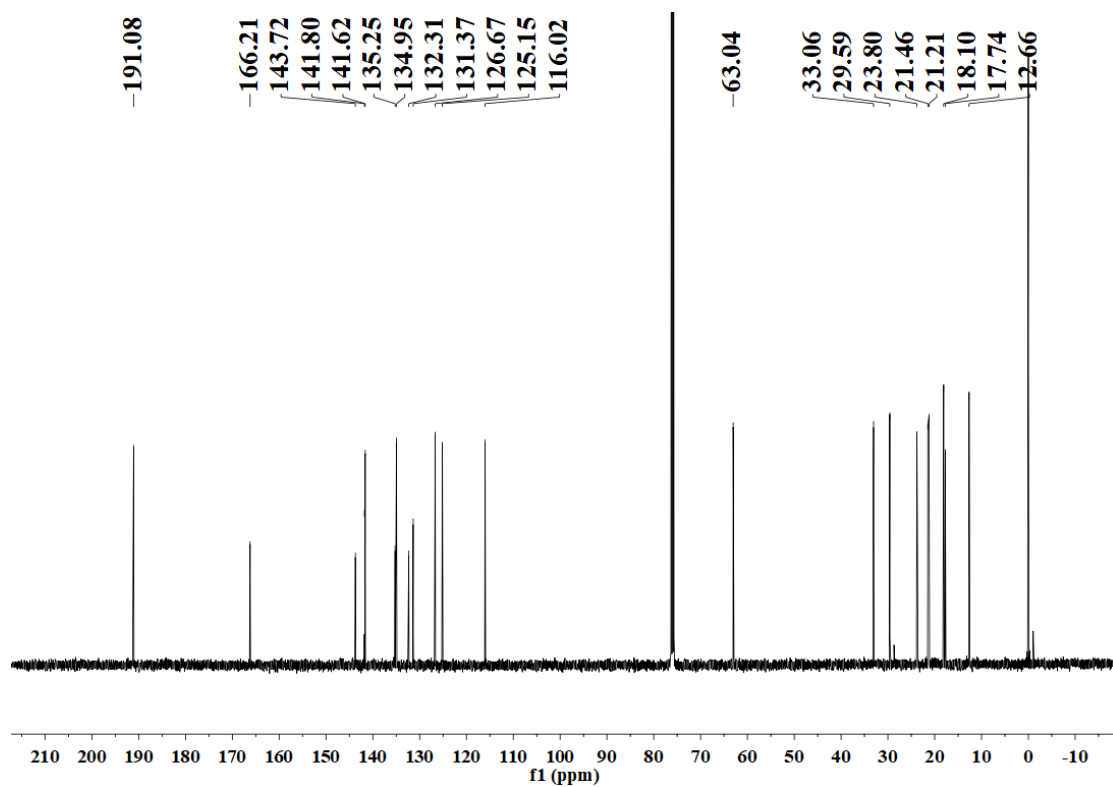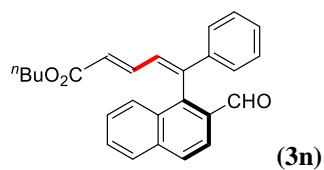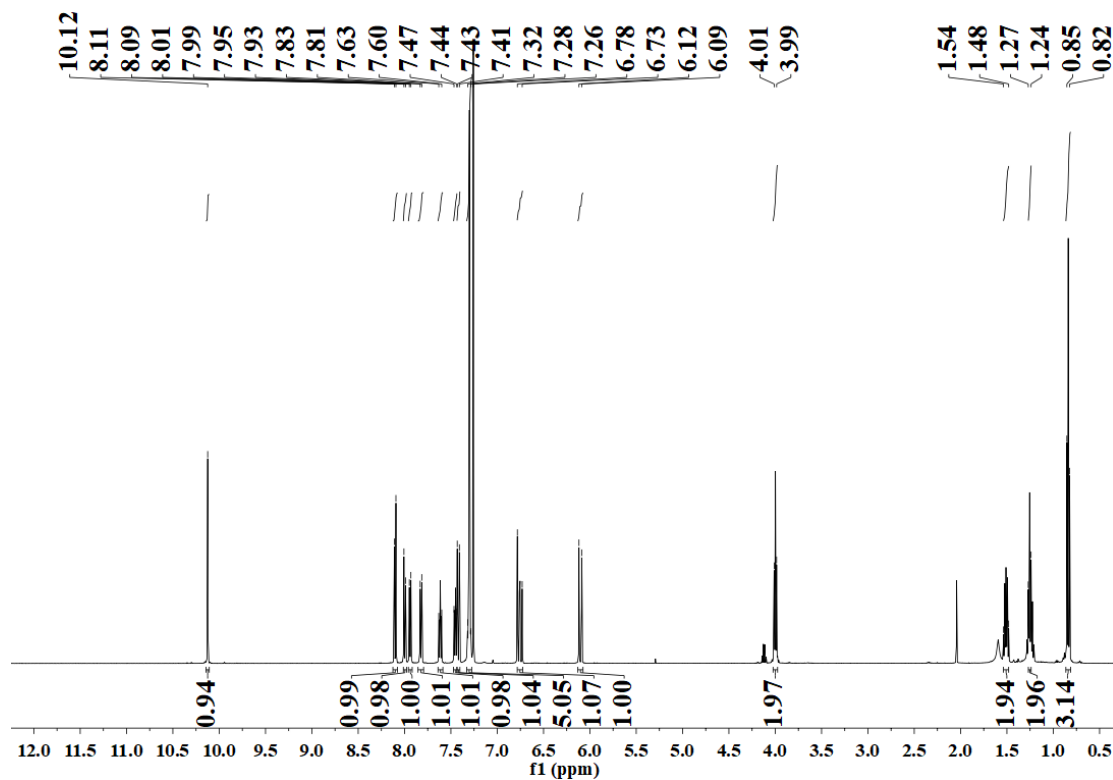



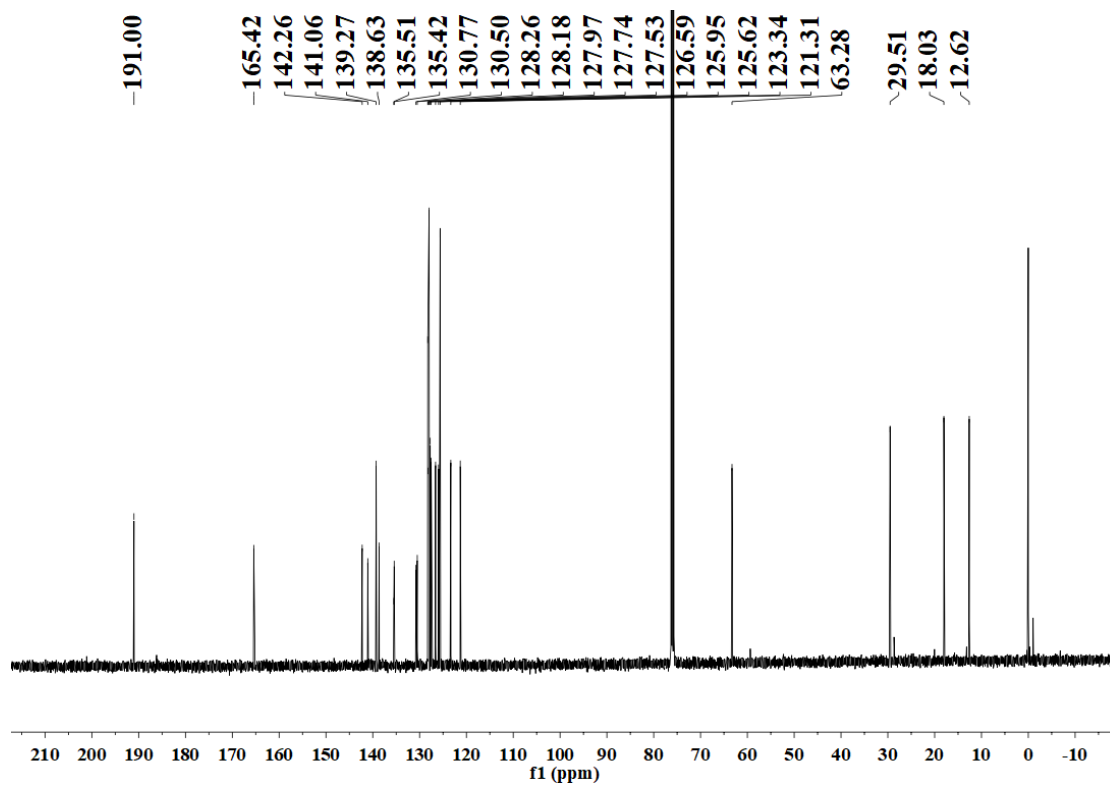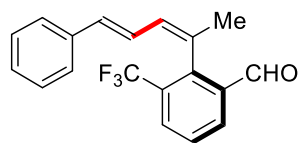

(30)

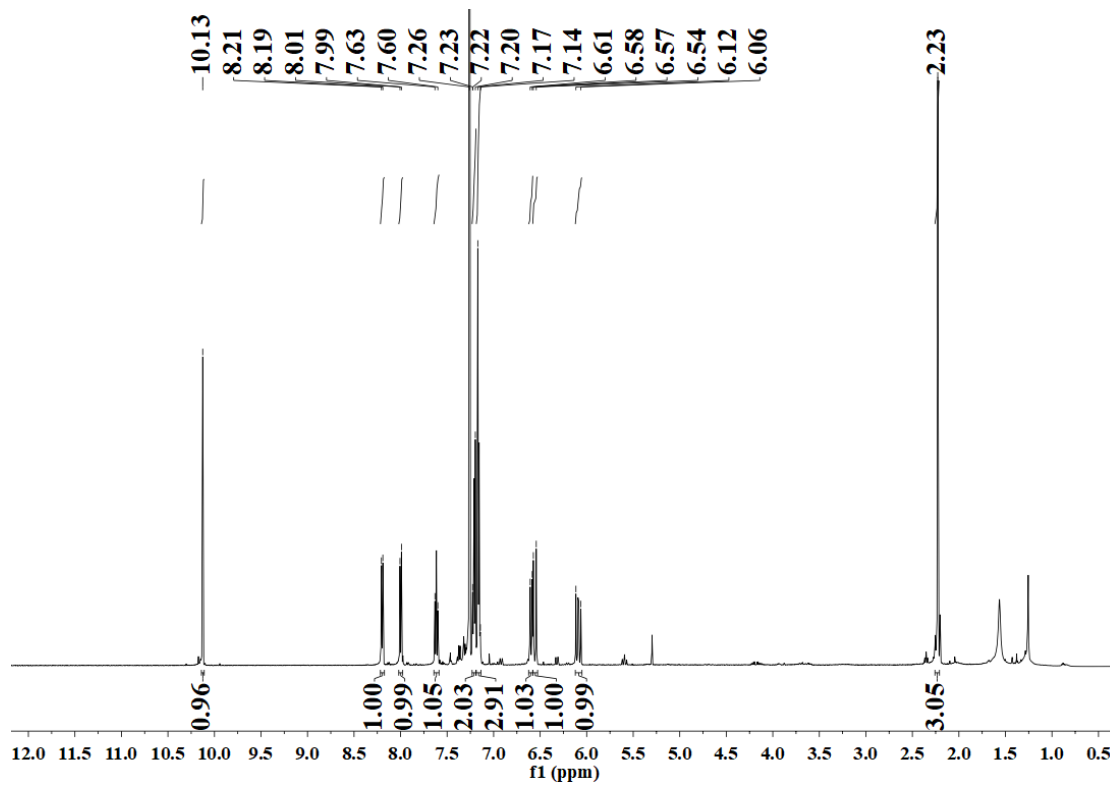

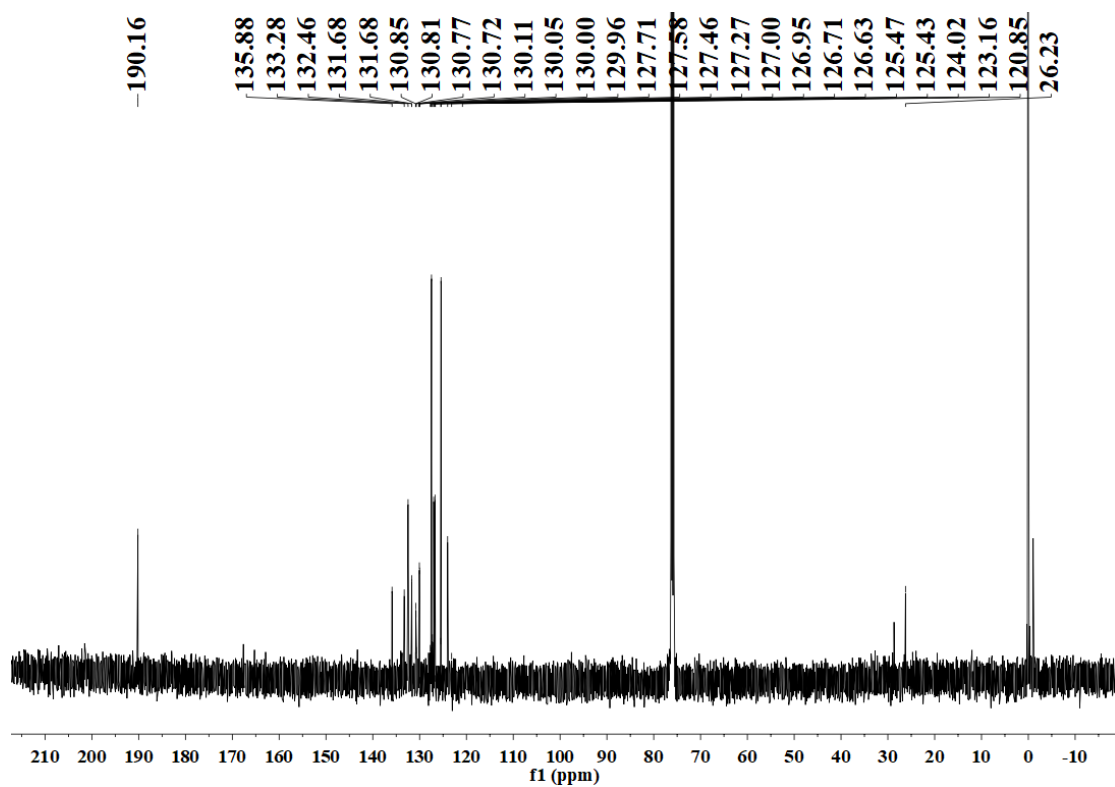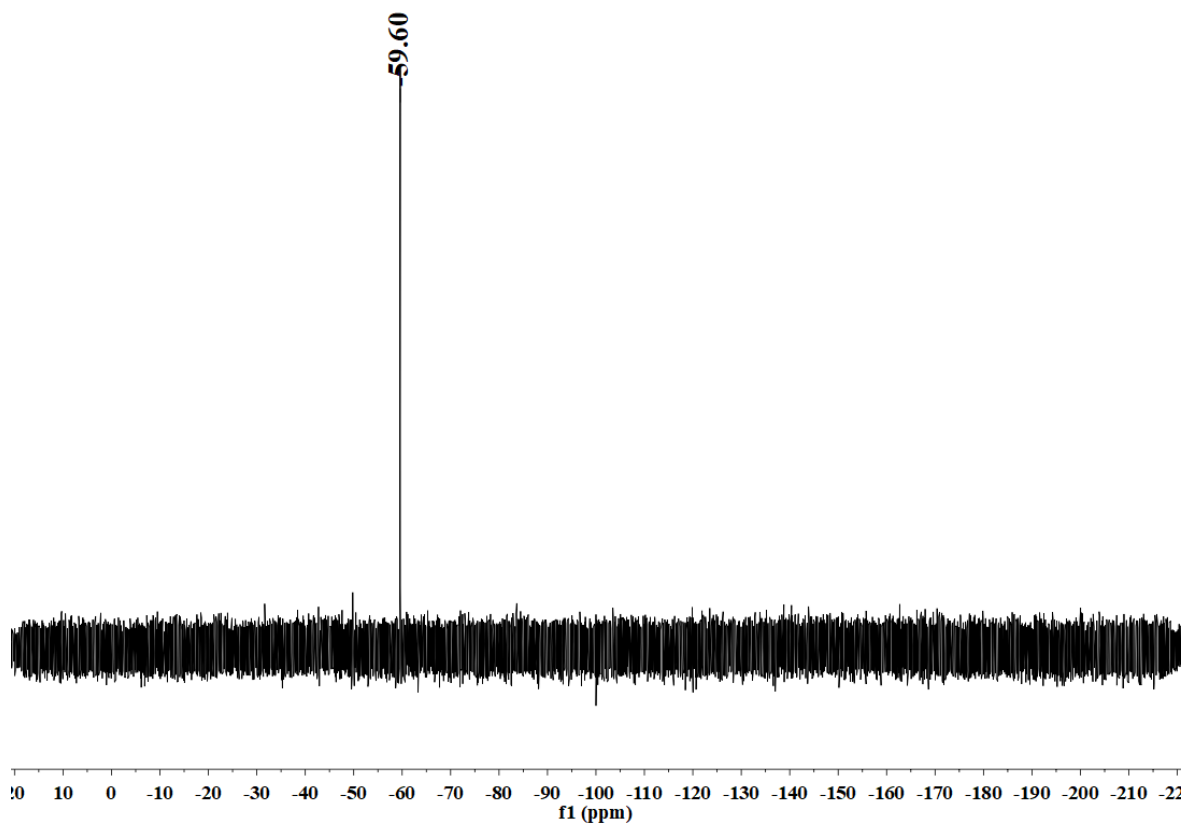

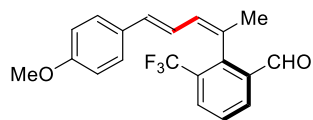

(3p)

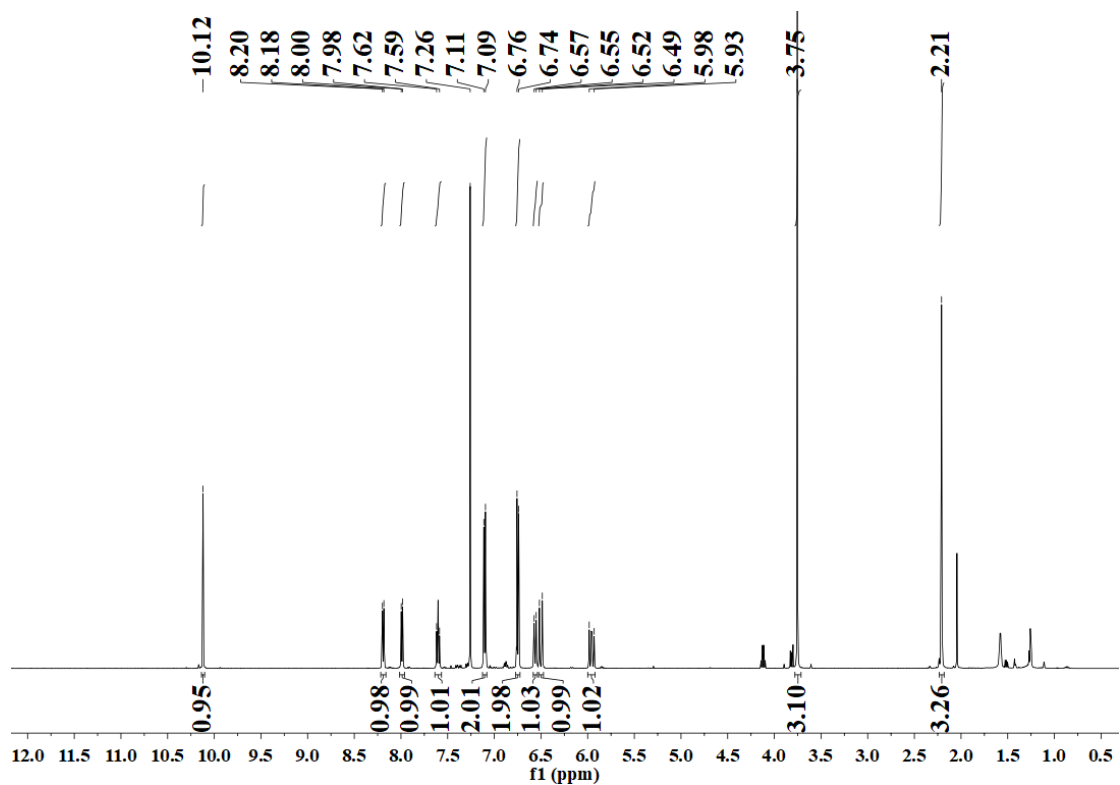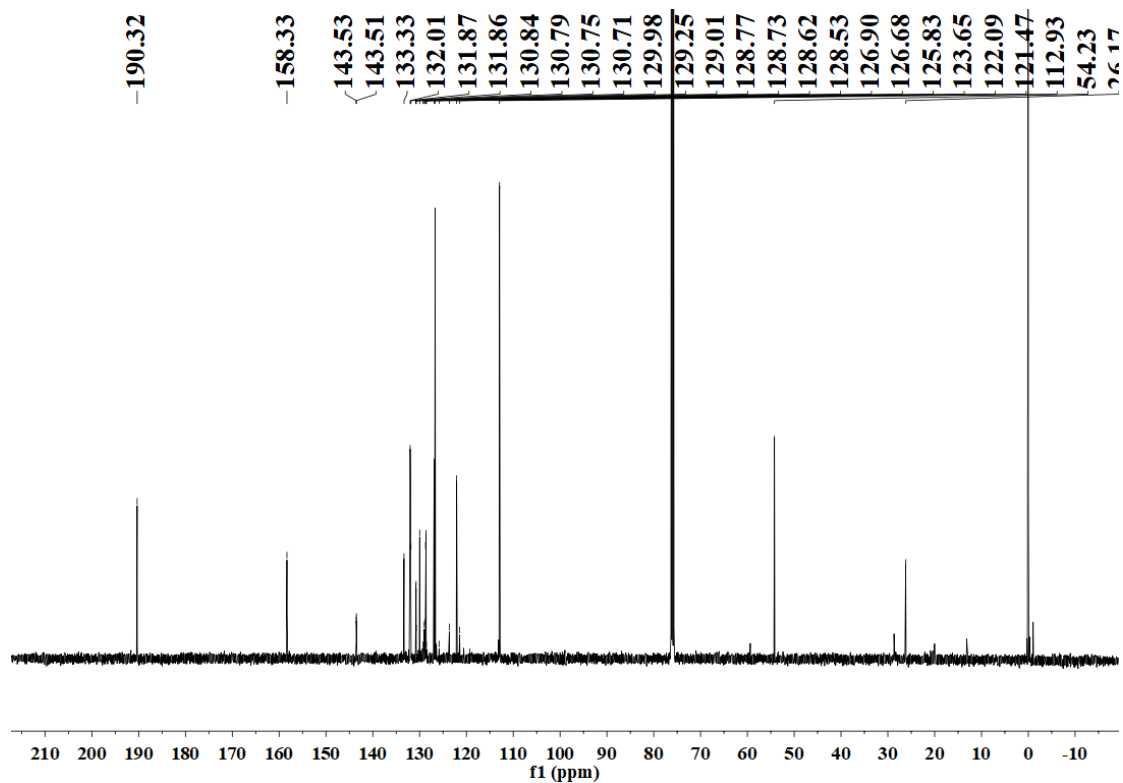

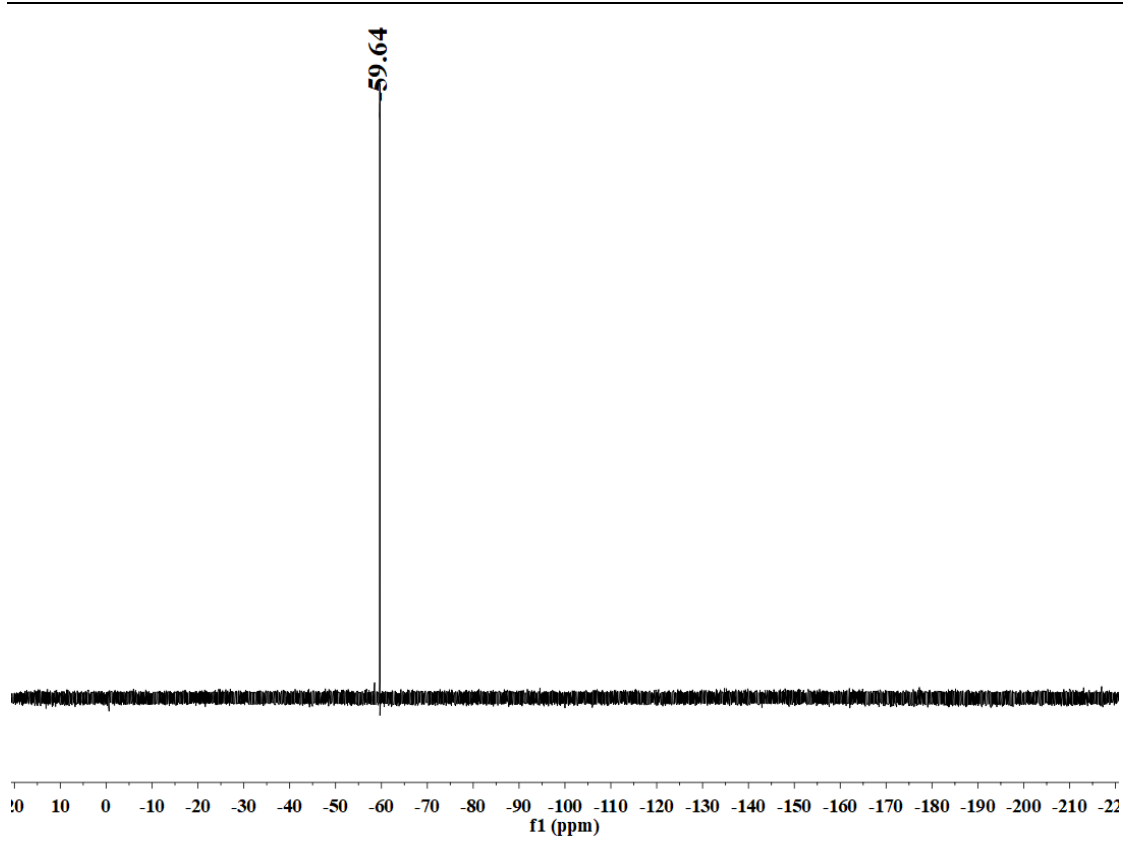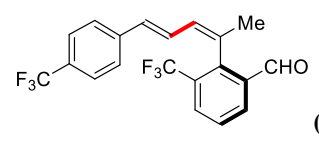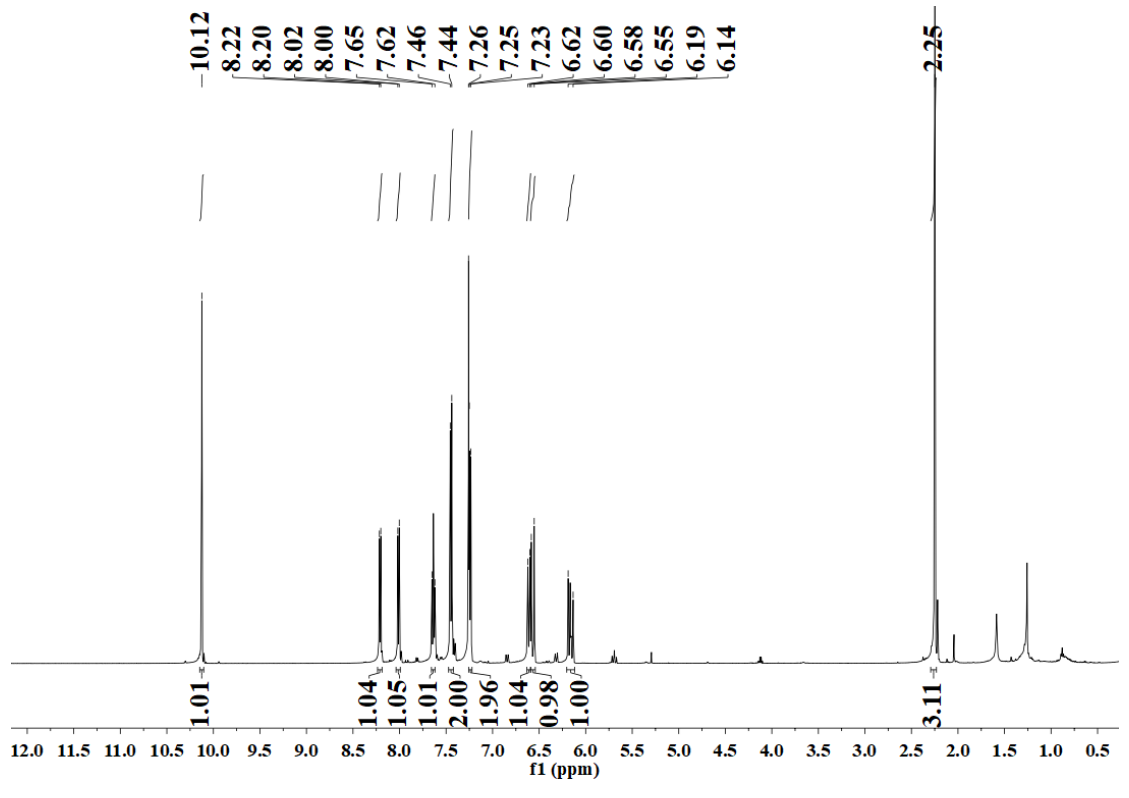

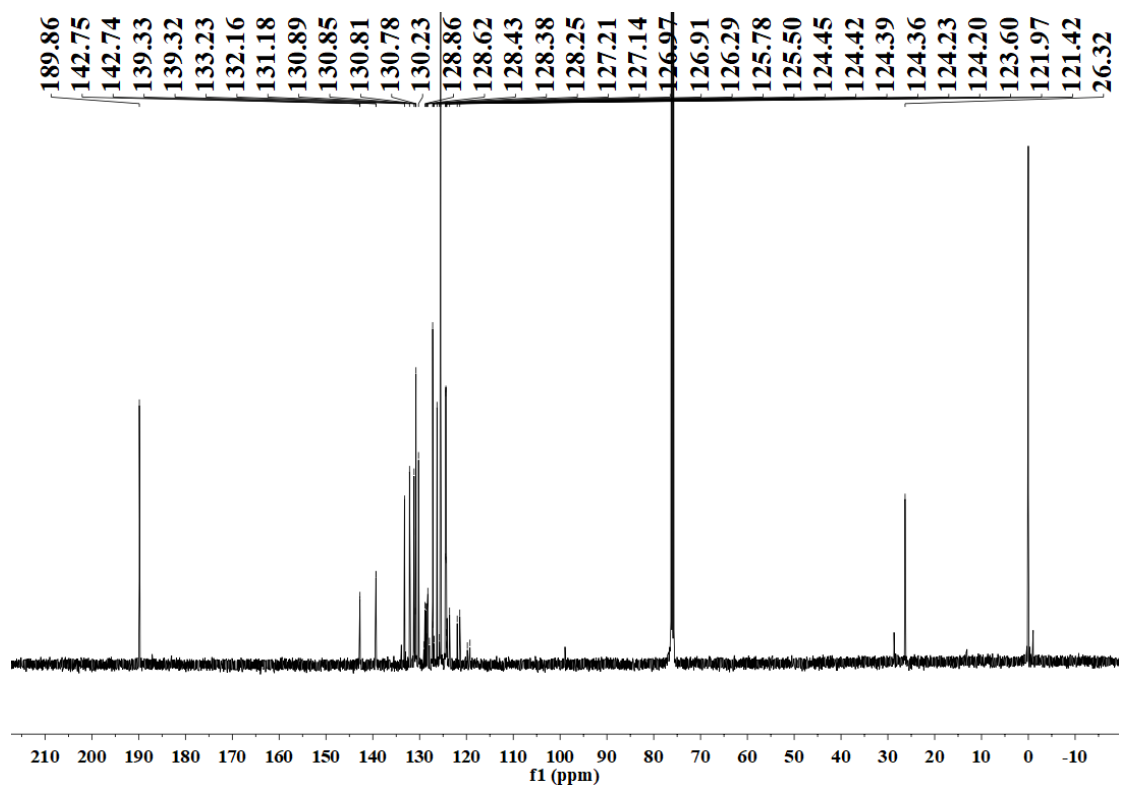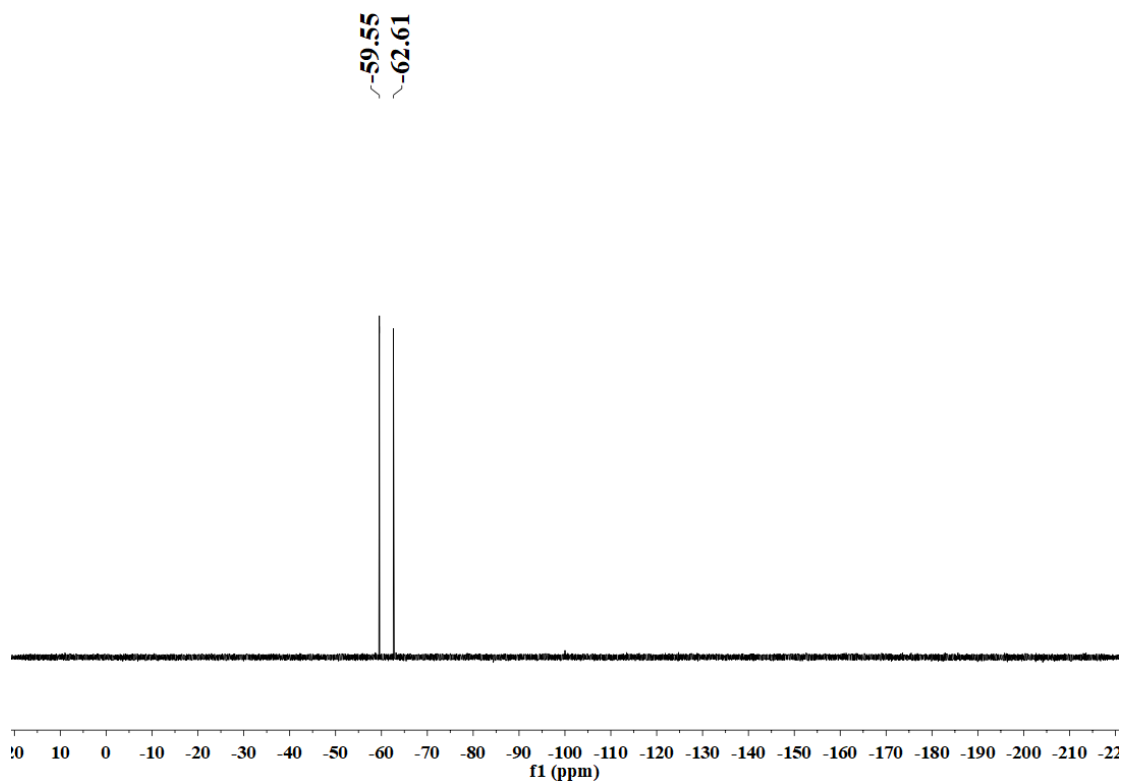

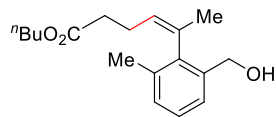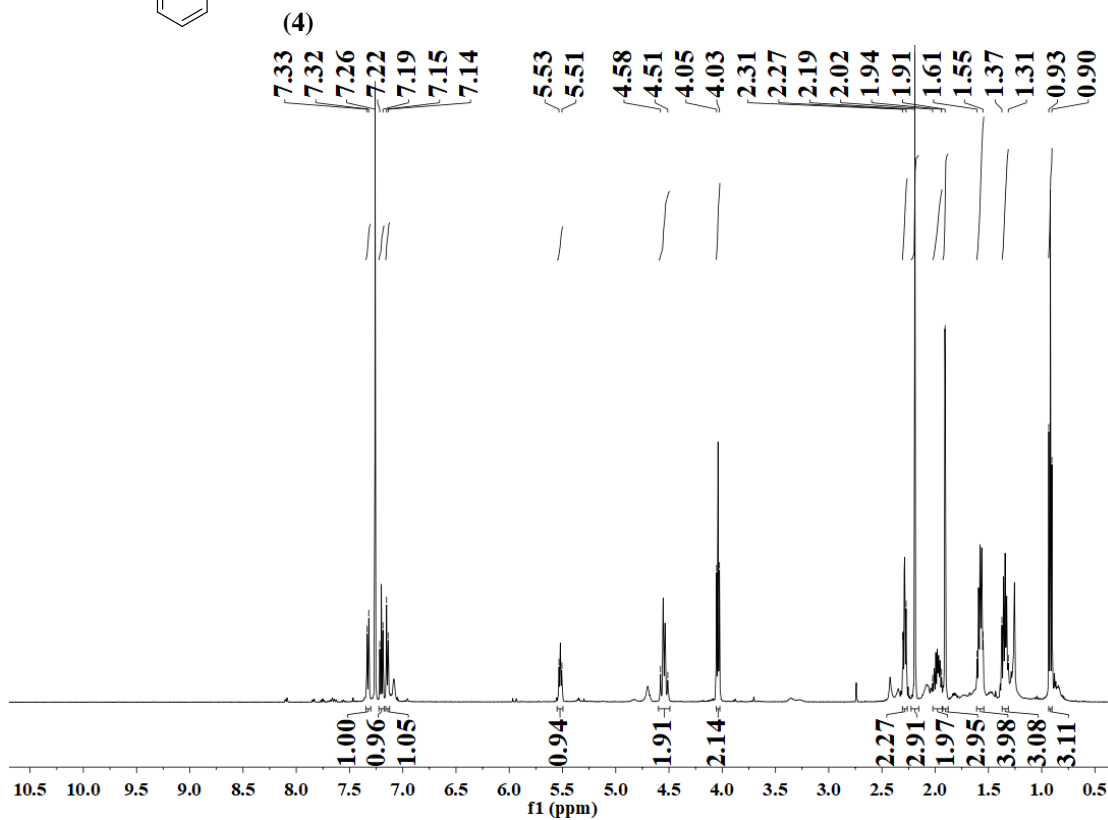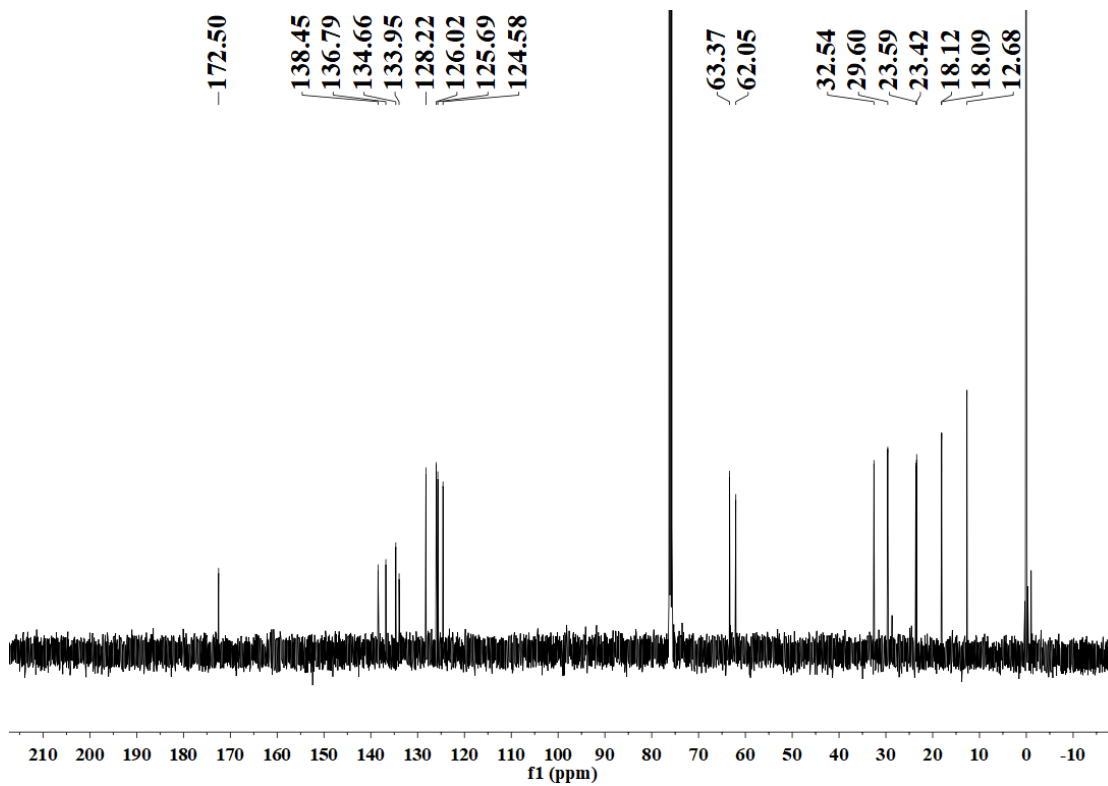

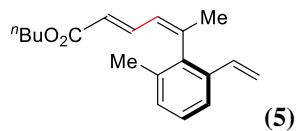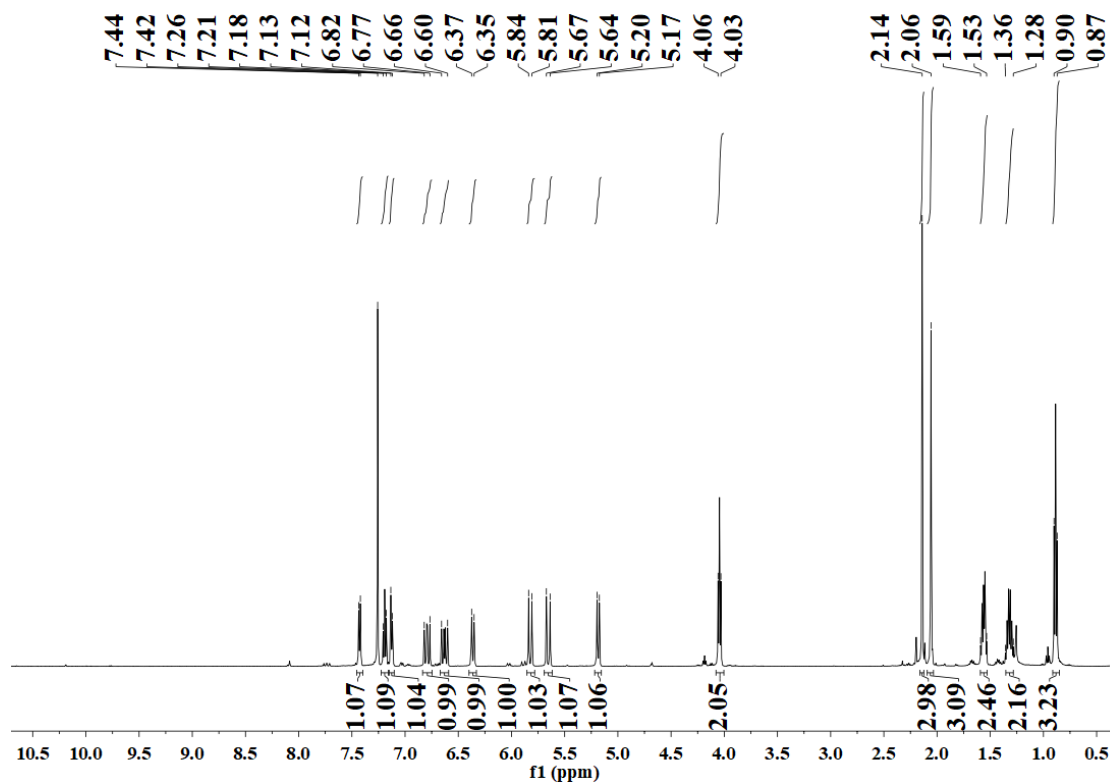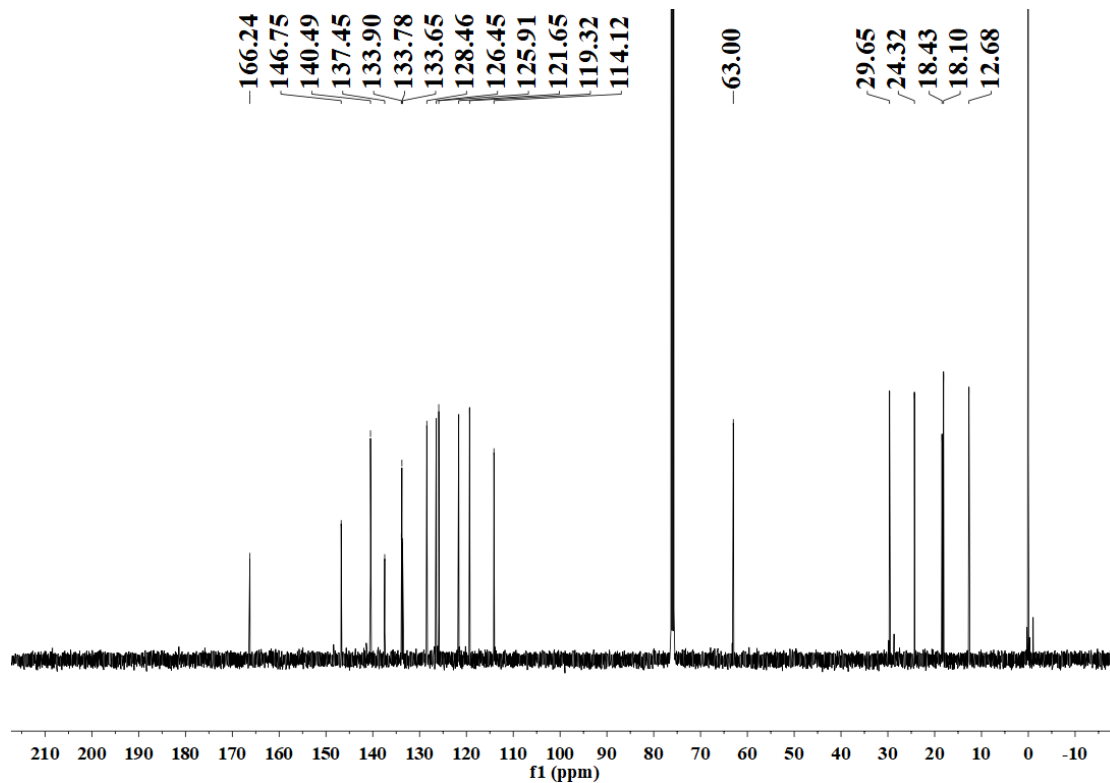

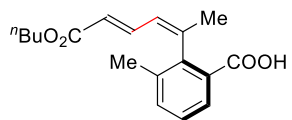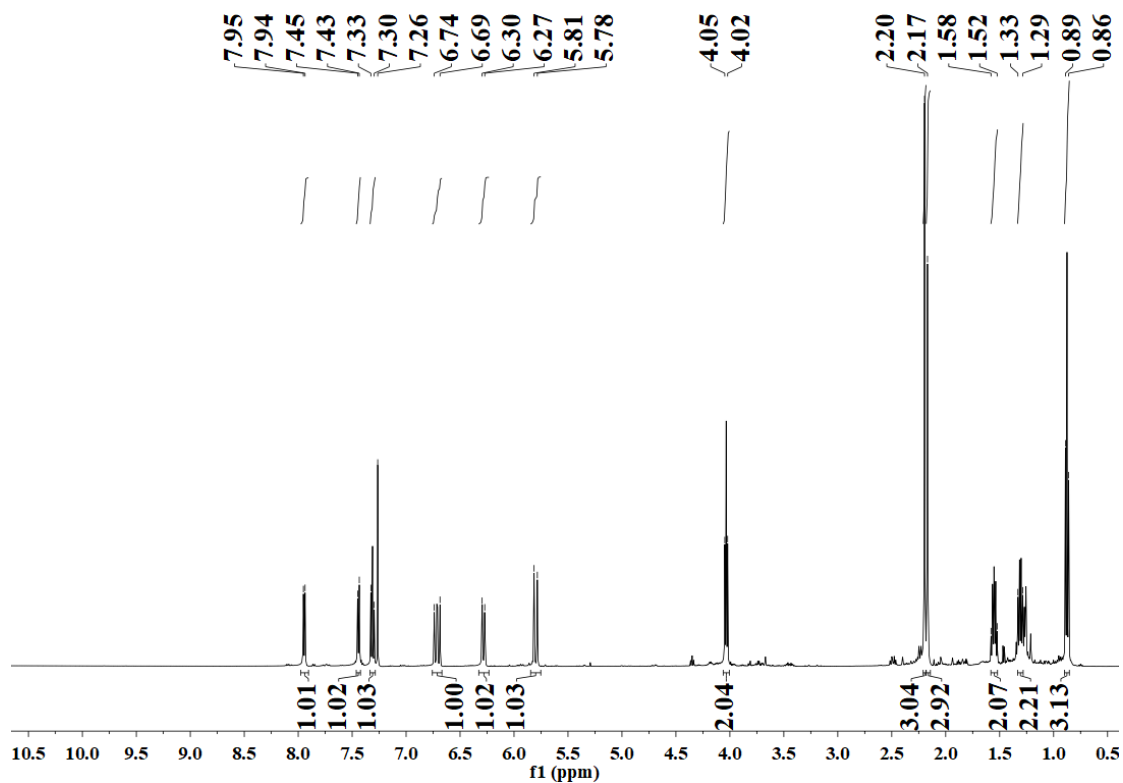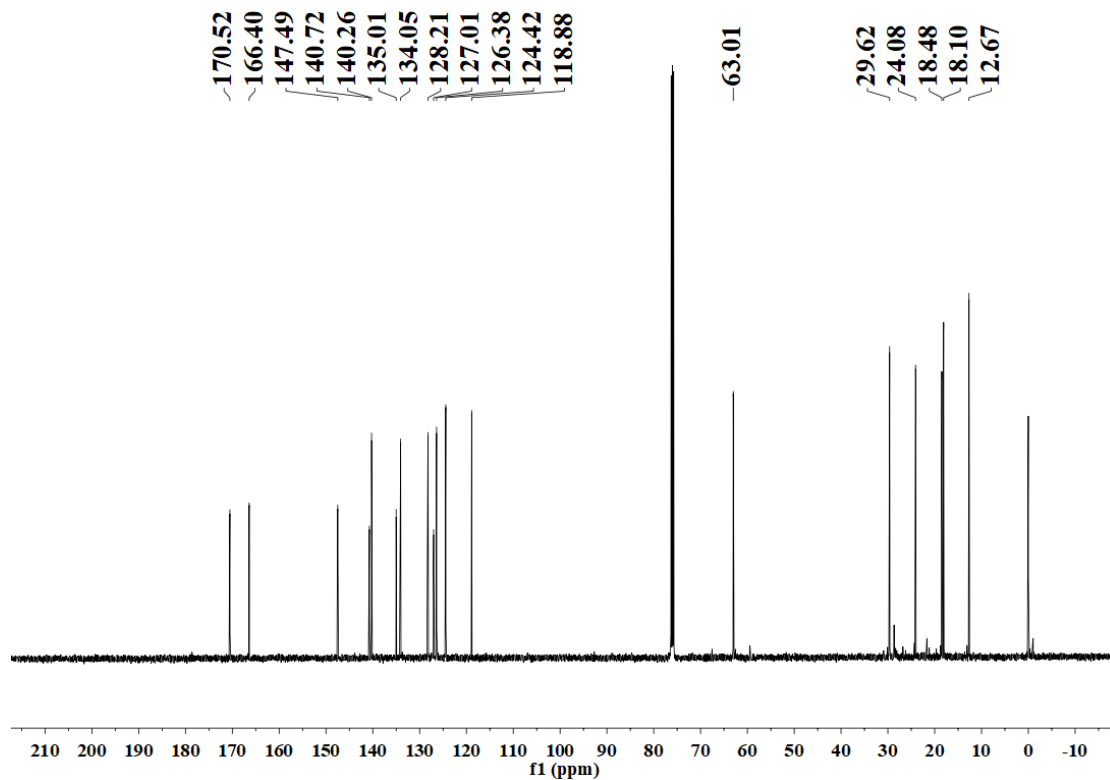



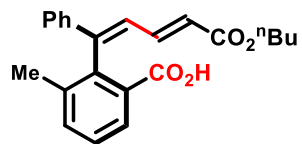

(6b)

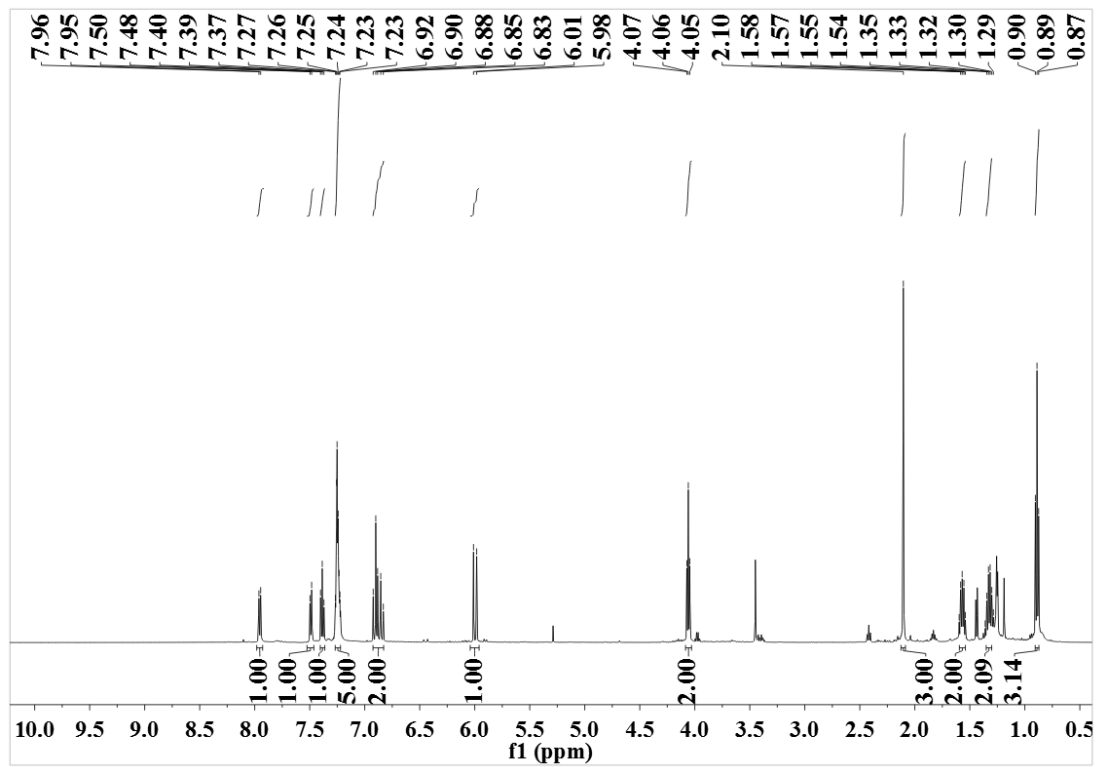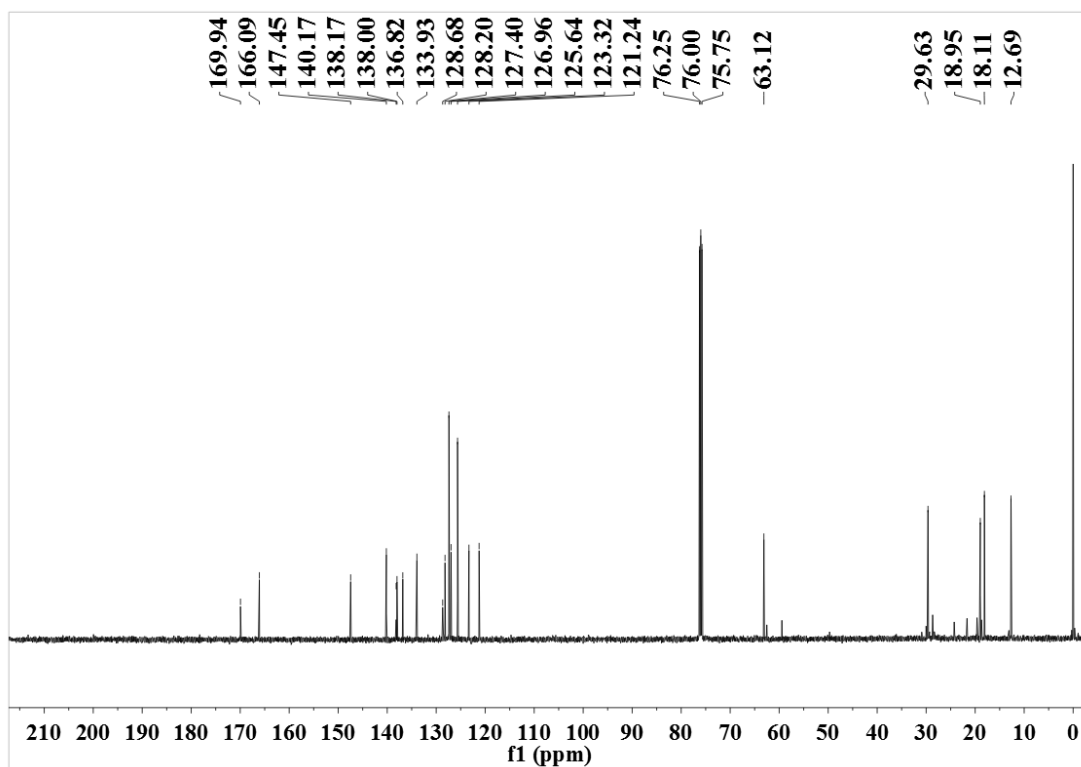

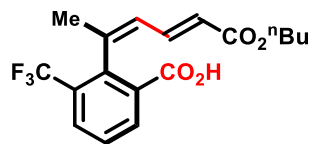

(6c)

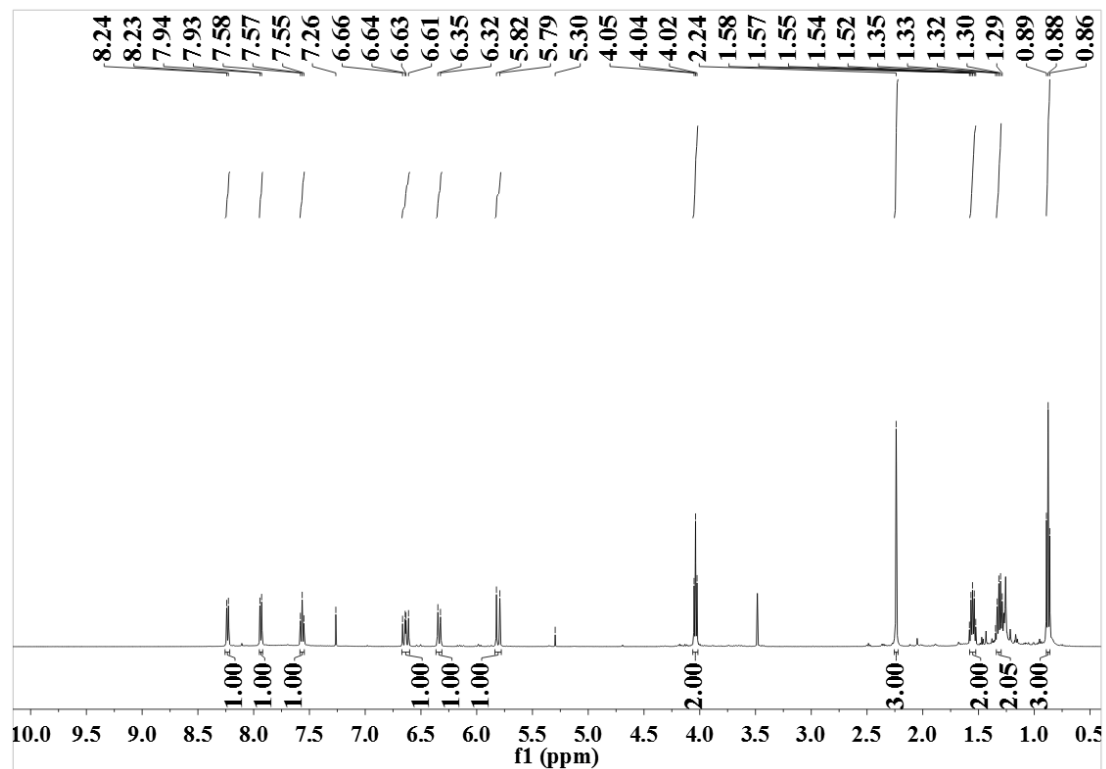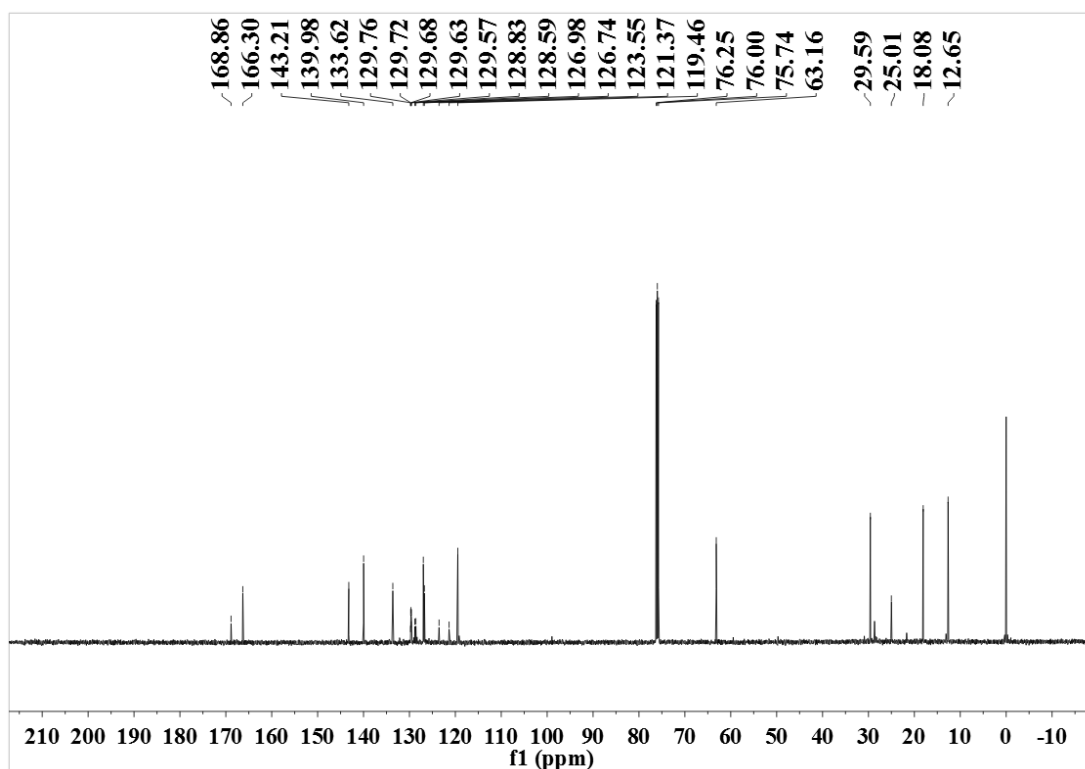

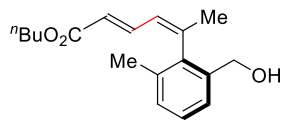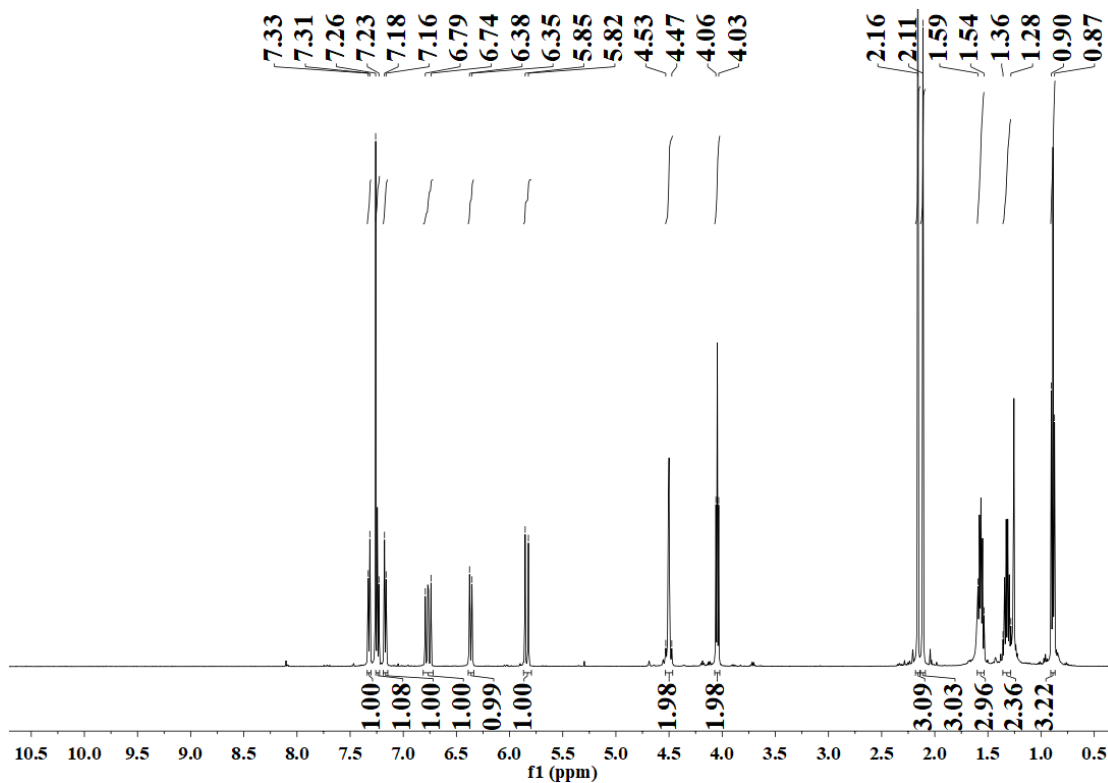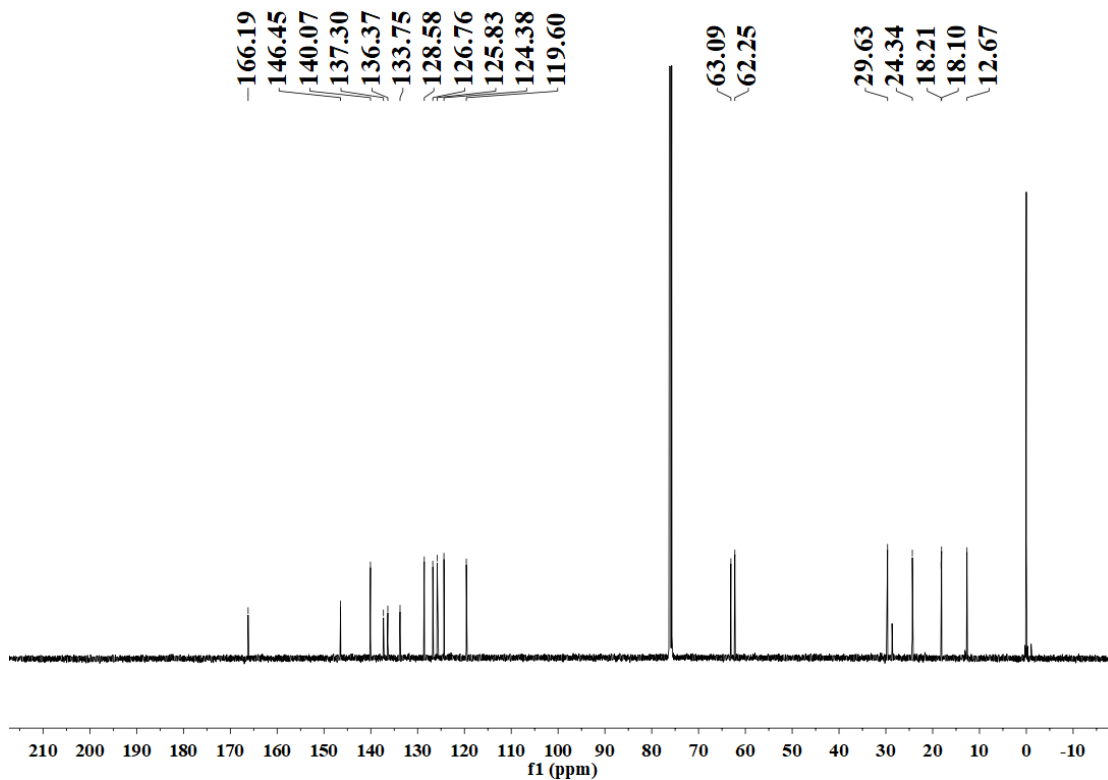

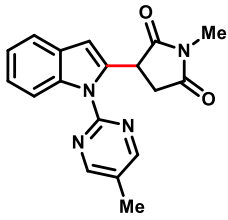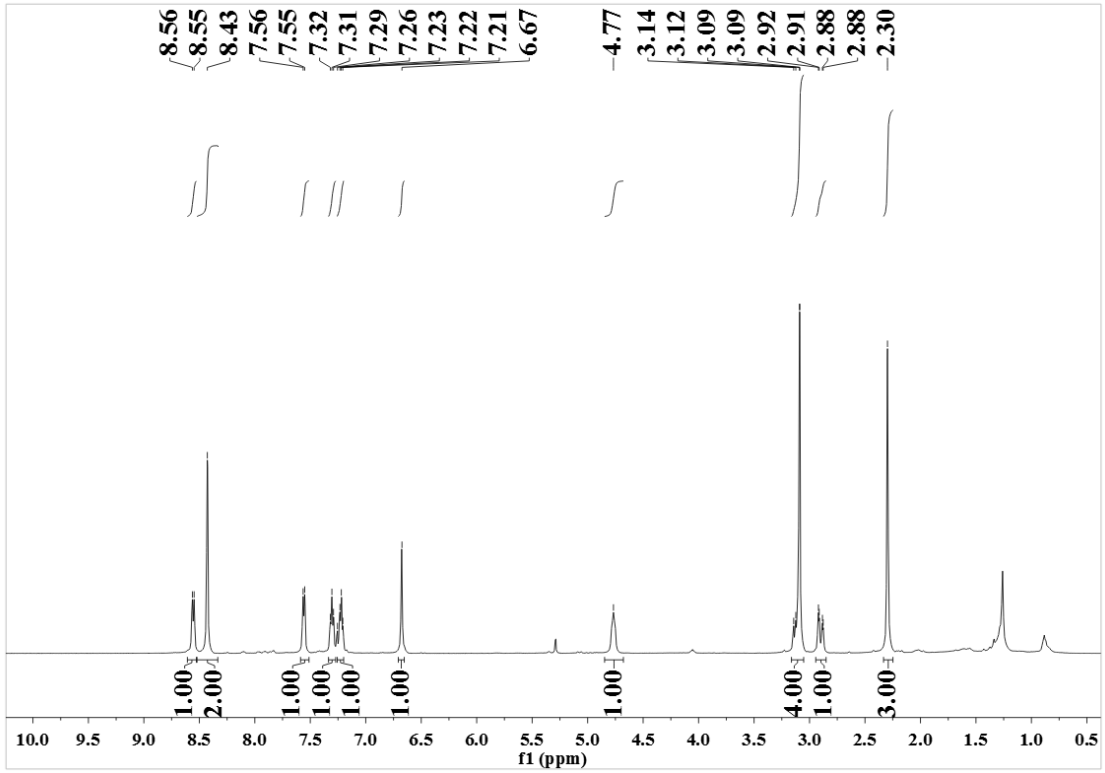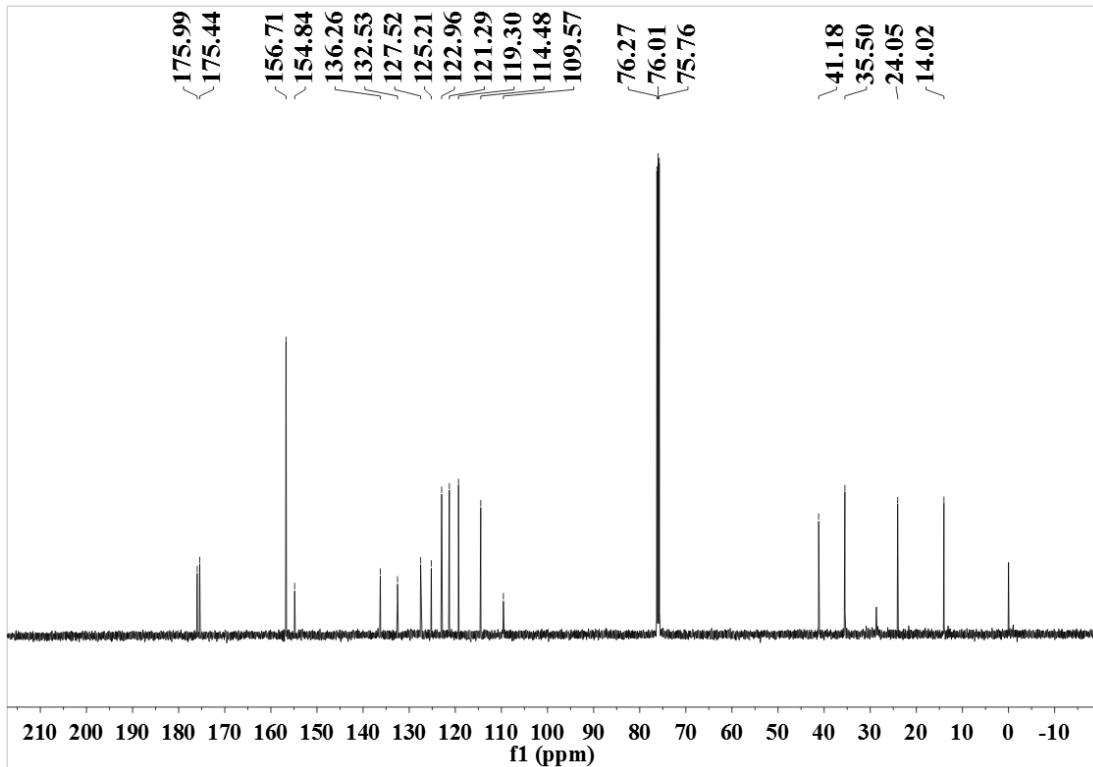

## 11. Copies of HPLC Analysis

### 11.1 Copies of HPLC Analysis for $\beta$ -C-H Alkenylation product

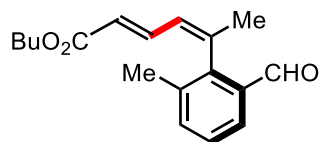

**3a**  
82%, 98% ee

Daicel Chiralpak OD-H column, n-hexane/*i*-PrOH (60/40), 1.0 mL/min, 254 nm, 15.763 min (major enantiomer), 23.606 min (minor enantiomer).

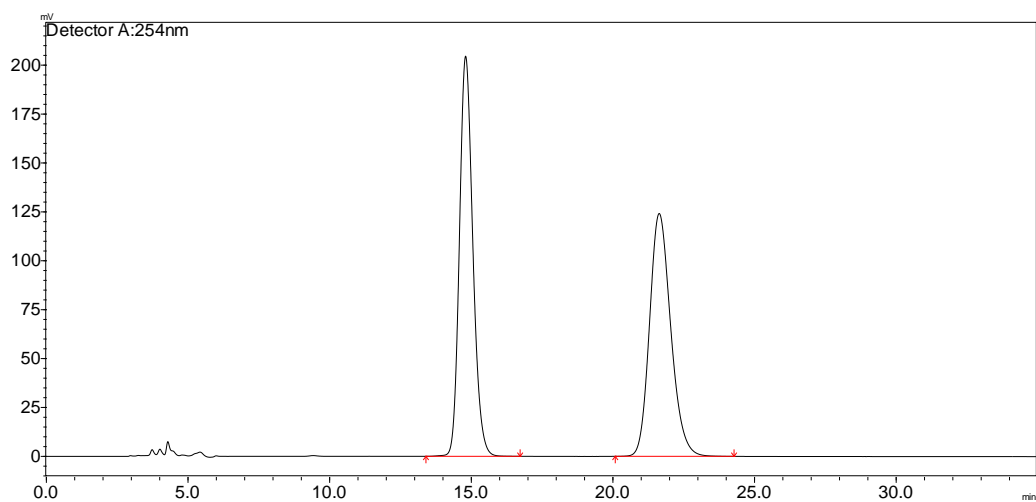

| Peak# | Ret. Time | Area     | Height | Area %  | Height % |
|-------|-----------|----------|--------|---------|----------|
| 1     | 14.796    | 6722363  | 204590 | 51.011  | 62.233   |
| 2     | 21.630    | 6455973  | 124158 | 48.989  | 37.767   |
| Total |           | 13178336 | 328748 | 100.000 | 100.000  |

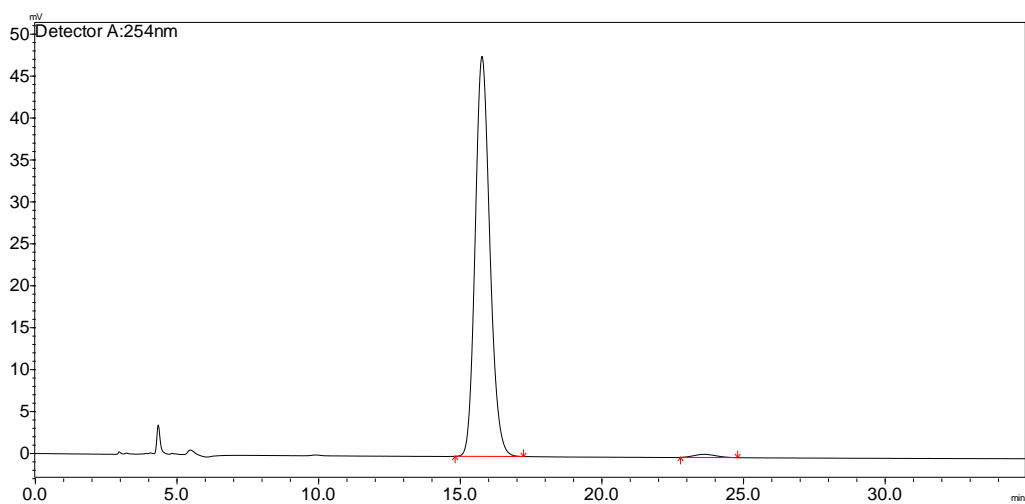

| Peak# | Ret. Time | Area    | Height | Area %  | Height % |
|-------|-----------|---------|--------|---------|----------|
| 1     | 15.763    | 1718651 | 47698  | 98.834  | 99.220   |
| 2     | 23.606    | 20278   | 375    | 1.166   | 0.780    |
| Total |           | 1738929 | 48073  | 100.000 | 100.000  |

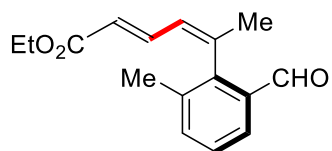

**3b**  
67%, 98% ee

Daicel Chiralpak OD-H column, n-hexane/*i*-PrOH (60/40), 1.0 mL/min, 254 nm, 17.331 min (major enantiomer), 24.726 min (minor enantiomer).

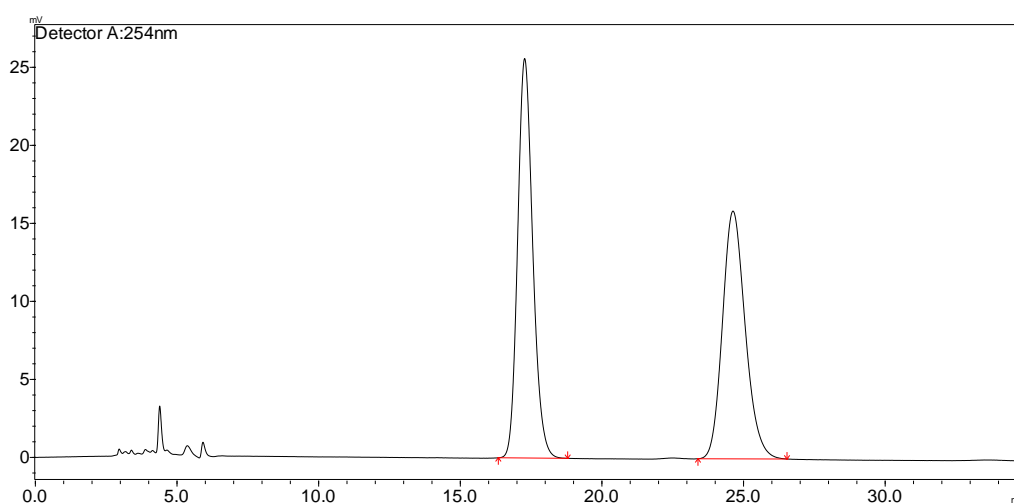

| Peak# | Ret. Time | Area    | Height | Area %  | Height % |
|-------|-----------|---------|--------|---------|----------|
| 1     | 17.268    | 949791  | 25600  | 51.666  | 61.717   |
| 2     | 24.622    | 888548  | 15880  | 48.334  | 38.283   |
| Total |           | 1838339 | 41480  | 100.000 | 100.000  |

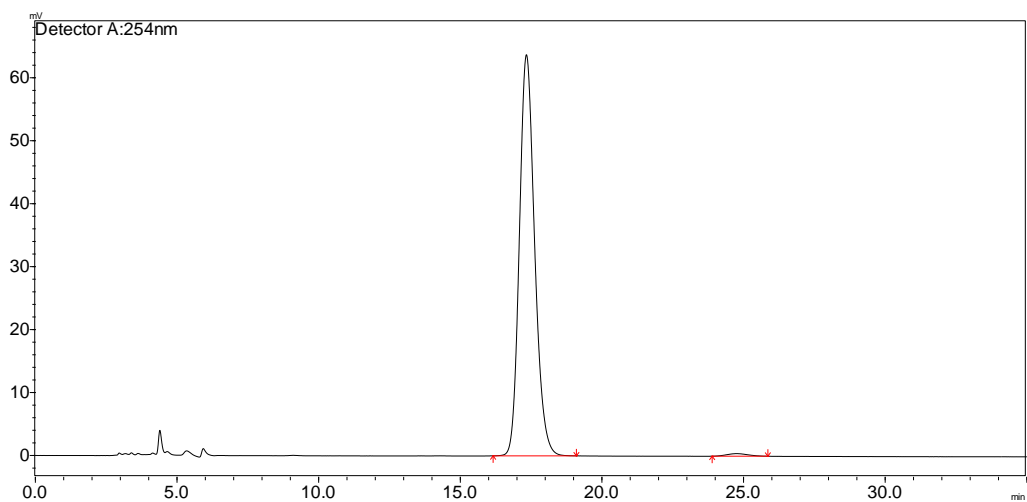

| Peak# | Ret. Time | Area    | Height | Area %  | Height % |
|-------|-----------|---------|--------|---------|----------|
| 1     | 17.331    | 2385656 | 63731  | 99.102  | 99.362   |
| 2     | 24.726    | 21607   | 409    | 0.898   | 0.638    |
| Total |           | 2407263 | 64140  | 100.000 | 100.000  |

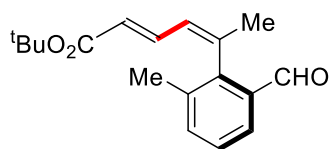

**3c**  
69%, 98% ee

Daicel Chiralpak OD-H column, n-hexane/*i*-PrOH 98/2), 0.5 mL/min, 254 nm, 18.950 min (major enantiomer), 21.680 min (minor enantiomer).

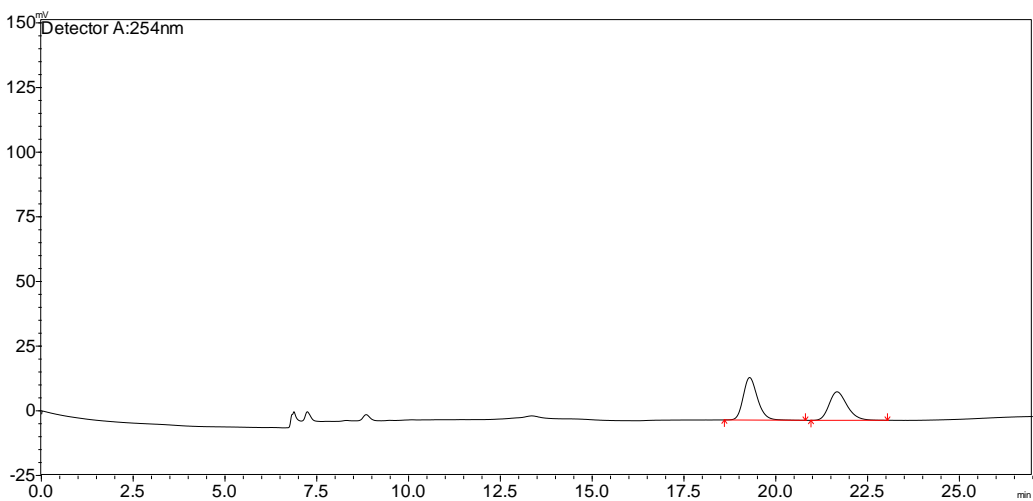

| Peak# | Ret. Time | Area   | Height | Area %  | Height % |
|-------|-----------|--------|--------|---------|----------|
| 1     | 19.283    | 444756 | 16427  | 54.190  | 59.841   |
| 2     | 21.664    | 375975 | 11024  | 45.810  | 40.159   |
| Total |           | 820732 | 27452  | 100.000 | 100.000  |

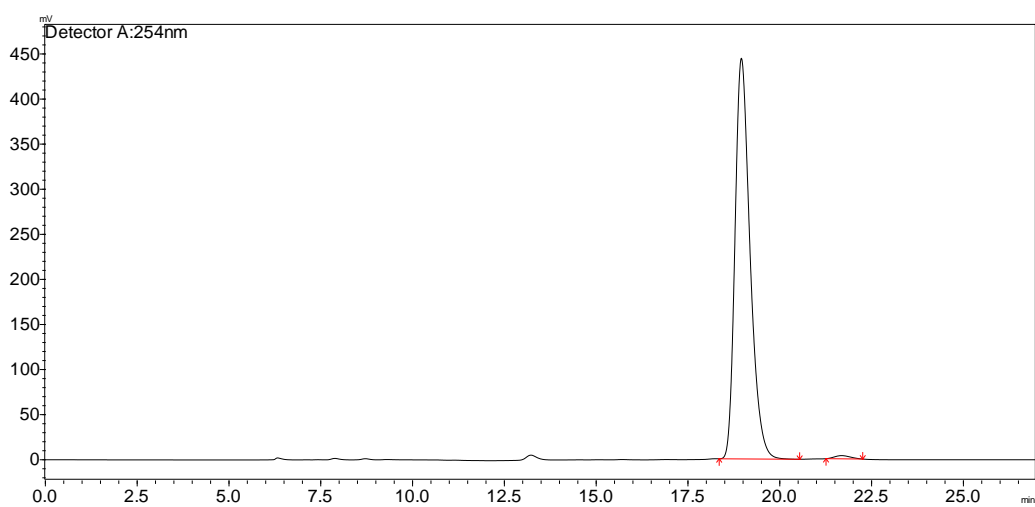

| Peak# | Ret. Time | Area     | Height | Area %  | Height % |
|-------|-----------|----------|--------|---------|----------|
| 1     | 18.950    | 12648880 | 444292 | 99.152  | 99.206   |
| 2     | 21.680    | 108178   | 3558   | 0.848   | 0.794    |
| Total |           | 12757059 | 447850 | 100.000 | 100.000  |

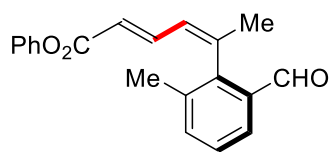

**3d**  
70%, 99% ee

Daicel Chiralpak IB-H column, n-hexane/i-PrOH (95/5), 0.5 mL/min, 254 nm, 26.432 min (major enantiomer), 28.410 min (minor enantiomer).

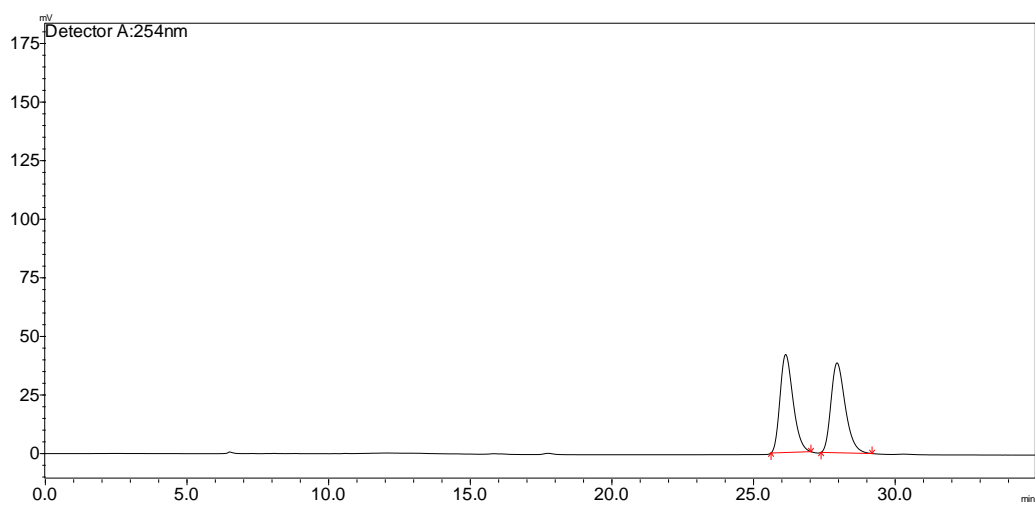

| Peak# | Ret. Time | Area    | Height | Area % | Height % |
|-------|-----------|---------|--------|--------|----------|
| 1     | 26.129    | 1340278 | 41847  | 49.854 | 52.185   |
| 2     | 27.943    | 1348151 | 38343  | 50.146 | 47.815   |



|       |  |         |       |         |         |
|-------|--|---------|-------|---------|---------|
| Total |  | 2688429 | 80190 | 100.000 | 100.000 |
|-------|--|---------|-------|---------|---------|

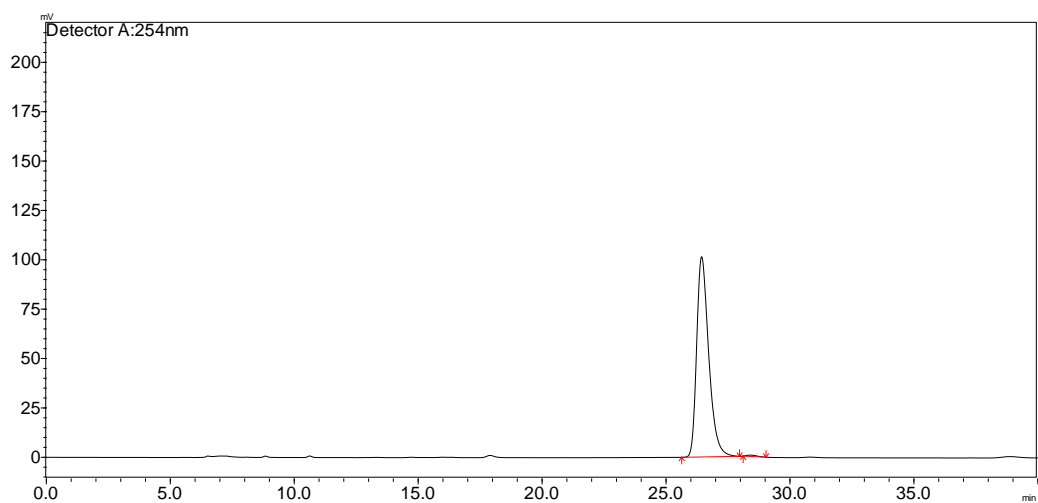

| Peak# | Ret. Time | Area    | Height | Area %  | Height % |
|-------|-----------|---------|--------|---------|----------|
| 1     | 26.432    | 3430976 | 101384 | 99.455  | 99.338   |
| 2     | 28.410    | 18799   | 675    | 0.545   | 0.662    |
| Total |           | 3449775 | 102059 | 100.000 | 100.000  |

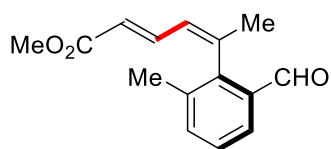

**3e**  
76%, 98% ee

Daicel Chiralpak OD-H column, n-hexane/*i*-PrOH (60/40), 1.0 mL/min, 254 nm, 23.133 min (major enantiomer), 34.742 min (minor enantiomer).

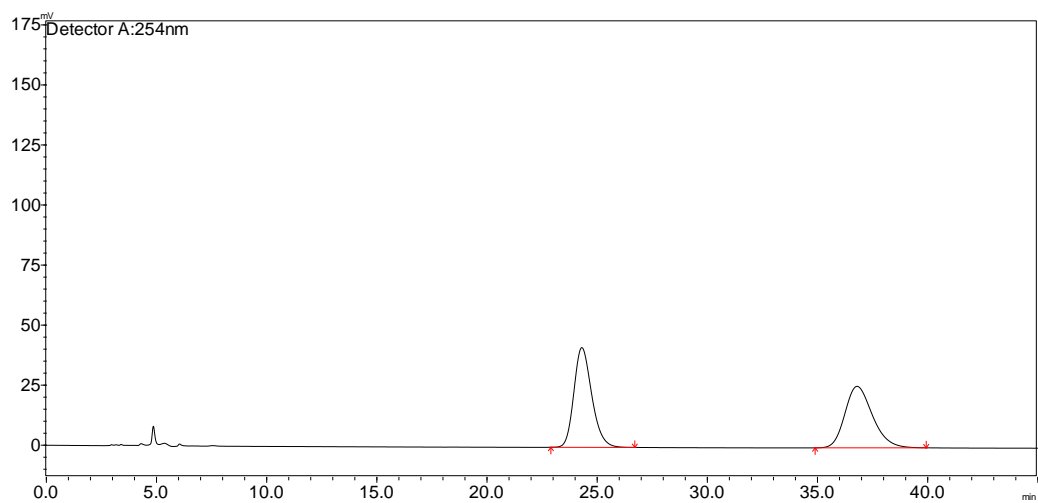

| Peak# | Ret. Time | Area    | Height | Area % | Height % |
|-------|-----------|---------|--------|--------|----------|
| 1     | 24.299    | 2345774 | 41519  | 51.274 | 61.858   |
| 2     | 36.792    | 2229169 | 25601  | 48.726 | 38.142   |

|       |  |         |       |         |         |
|-------|--|---------|-------|---------|---------|
| Total |  | 4574944 | 67120 | 100.000 | 100.000 |
|-------|--|---------|-------|---------|---------|

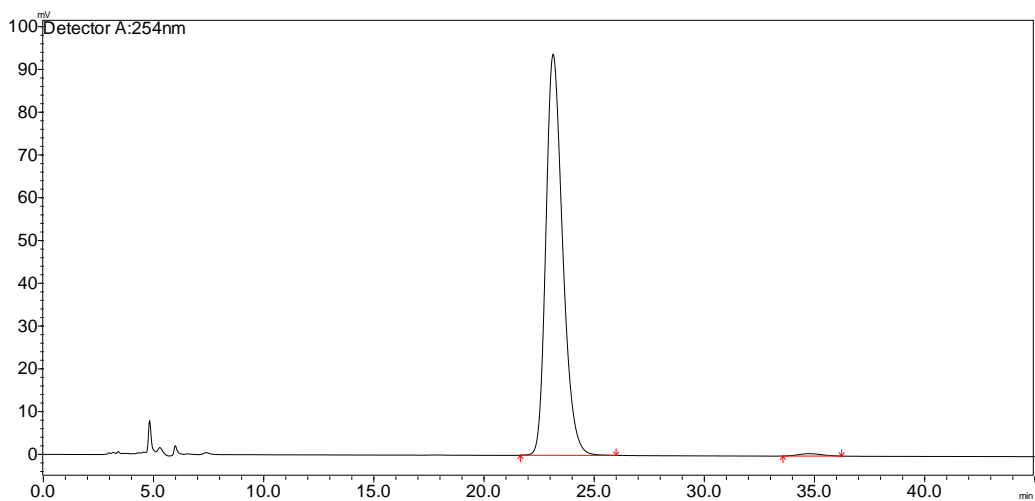

| Peak# | Ret. Time | Area    | Height | Area %  | Height % |
|-------|-----------|---------|--------|---------|----------|
| 1     | 23.133    | 4955220 | 93759  | 99.176  | 99.411   |
| 2     | 34.742    | 41177   | 555    | 0.824   | 0.589    |
| Total |           | 4996398 | 94314  | 100.000 | 100.000  |

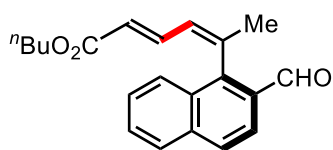

**3f**  
85%, > 99% ee

Daicel Chiralpak OD-H column, n-hexane/*i*-PrOH (60/40), 1.0 mL/min, 254 nm, 7.371 min (major enantiomer), 13.580 min (minor enantiomer).

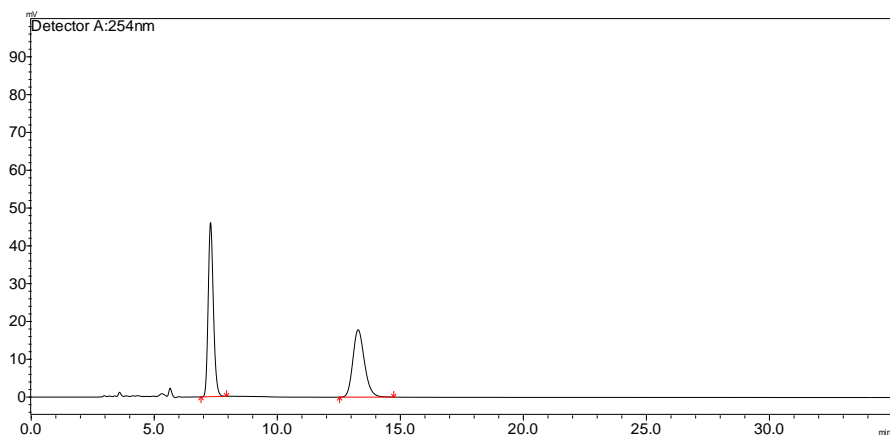

| Peak# | Ret. Time | Area    | Height | Area %  | Height % |
|-------|-----------|---------|--------|---------|----------|
| 1     | 7.284     | 680589  | 46051  | 53.782  | 72.093   |
| 2     | 13.281    | 584863  | 17826  | 46.218  | 27.907   |
| Total |           | 1265453 | 63877  | 100.000 | 100.000  |

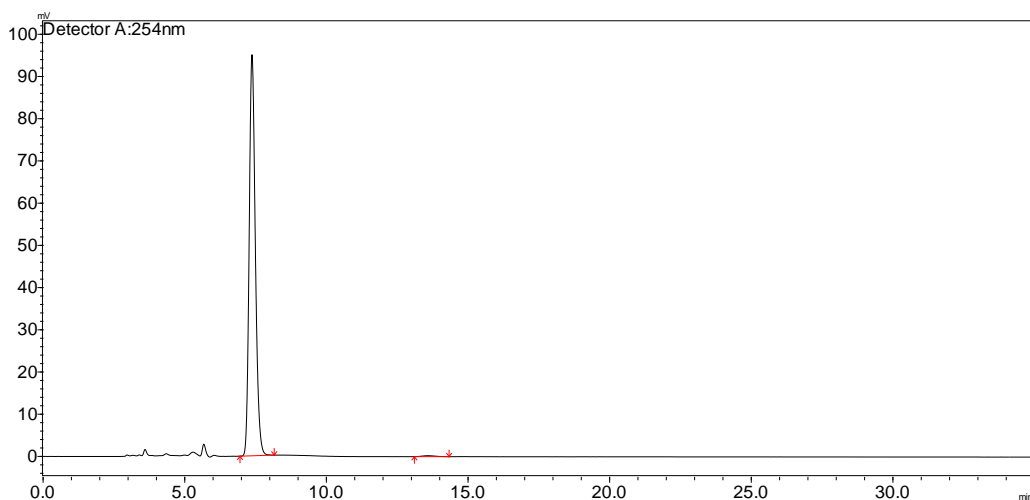

| Peak# | Ret. Time | Area    | Height | Area %  | Height % |
|-------|-----------|---------|--------|---------|----------|
| 1     | 7.371     | 1435341 | 95024  | 99.502  | 99.760   |
| 2     | 13.580    | 7188    | 229    | 0.498   | 0.240    |
| Total |           | 1442529 | 95253  | 100.000 | 100.000  |

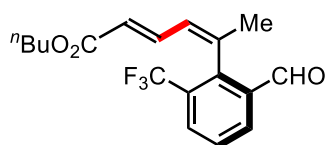

**3g**, 70%, > 99% ee

Daicel Chiralpak OD-H column, n-hexane/*i*-PrOH (60/40), 1.0 mL/min, 254 nm, 9.301 min (major enantiomer), 26.712 min (minor enantiomer).

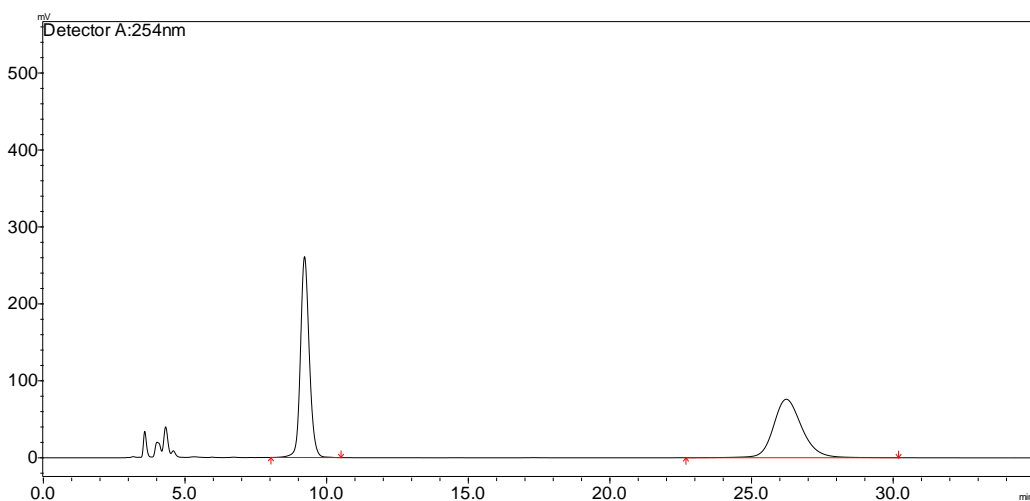

| Peak# | Ret. Time | Area     | Height | Area %  | Height % |
|-------|-----------|----------|--------|---------|----------|
| 1     | 9.216     | 5665406  | 261063 | 51.577  | 77.452   |
| 2     | 26.222    | 5318952  | 76000  | 48.423  | 22.548   |
| Total |           | 10984358 | 337063 | 100.000 | 100.000  |

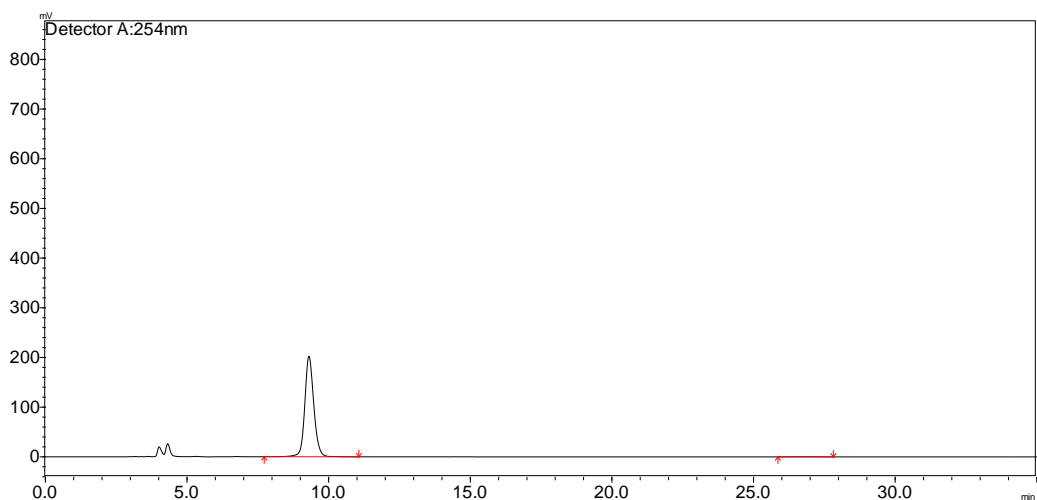

| Peak# | Ret. Time | Area    | Height | Area %  | Height % |
|-------|-----------|---------|--------|---------|----------|
| 1     | 9.301     | 4476780 | 202215 | 99.662  | 99.873   |
| 2     | 26.712    | 15198   | 257    | 0.338   | 0.127    |
| Total |           | 4491978 | 202472 | 100.000 | 100.000  |

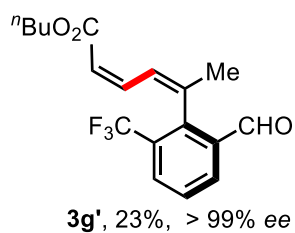

Daicel Chiralpak OD-H column, n-hexane/i-PrOH (92/8), 1.0 mL/min, 254 nm, 6.403 min (major enantiomer), 4.757 min (minor enantiomer).

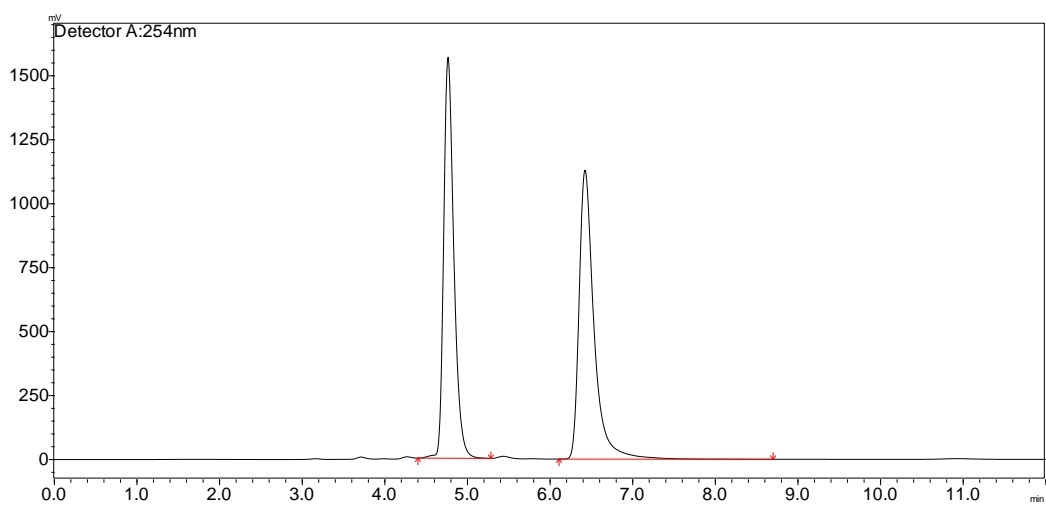

| Peak# | Ret. Time | Area     | Height  | Area % | Height % |
|-------|-----------|----------|---------|--------|----------|
| 1     | 4.760     | 13451490 | 1568113 | 48.642 | 58.119   |
| 2     | 6.418     | 14202507 | 1129980 | 51.358 | 41.881   |

|       |  |          |         |         |         |
|-------|--|----------|---------|---------|---------|
| Total |  | 27653997 | 2698093 | 100.000 | 100.000 |
|-------|--|----------|---------|---------|---------|

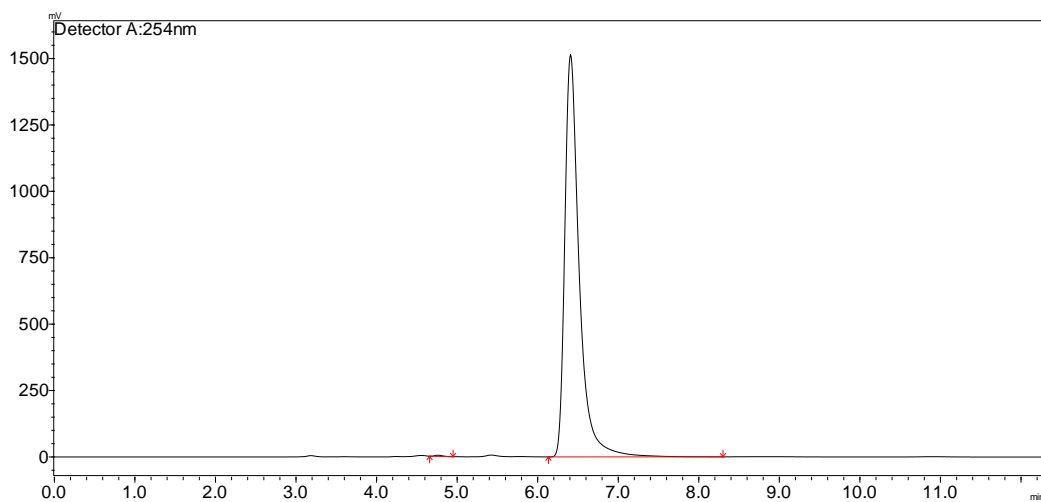

| Peak# | Ret. Time | Area     | Height  | Area %  | Height % |
|-------|-----------|----------|---------|---------|----------|
| 1     | 4.757     | 29218    | 4320    | 0.155   | 0.284    |
| 2     | 6.403     | 18869501 | 1514443 | 99.845  | 99.716   |
| Total |           | 18898719 | 1518762 | 100.000 | 100.000  |

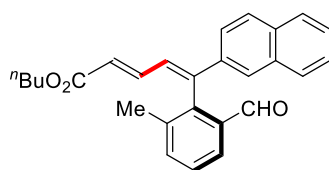

**3h**

71%, > 99% ee

Daicel Chiralpak OD-H column, n-hexane/*i*-PrOH (85/15), 1.0 mL/min, 254 nm, 11.377 min (major enantiomer), 6.578 min (minor enantiomer).

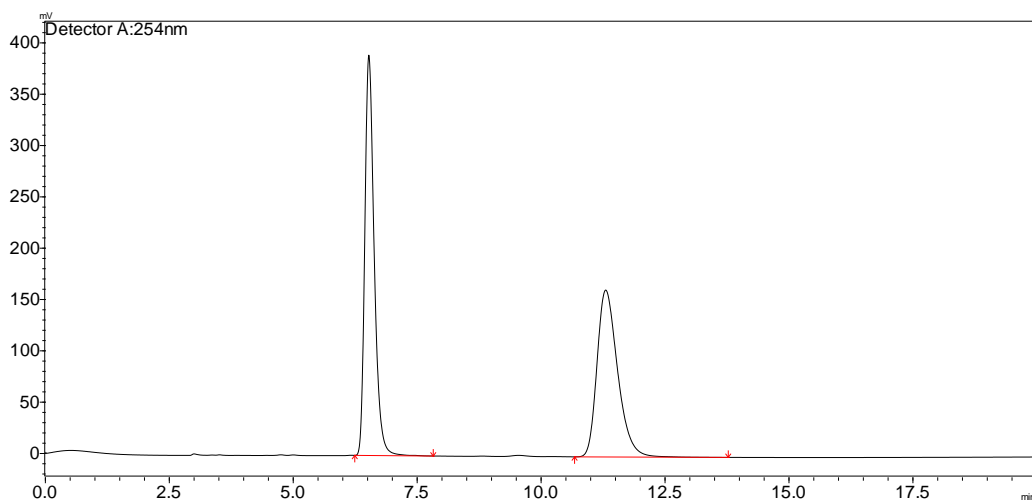

| Peak# | Ret. Time | Area    | Height | Area %  | Height % |
|-------|-----------|---------|--------|---------|----------|
| 1     | 6.521     | 5134802 | 390072 | 52.220  | 70.580   |
| 2     | 11.299    | 4698235 | 162592 | 47.780  | 29.420   |
| Total |           | 9833037 | 552664 | 100.000 | 100.000  |

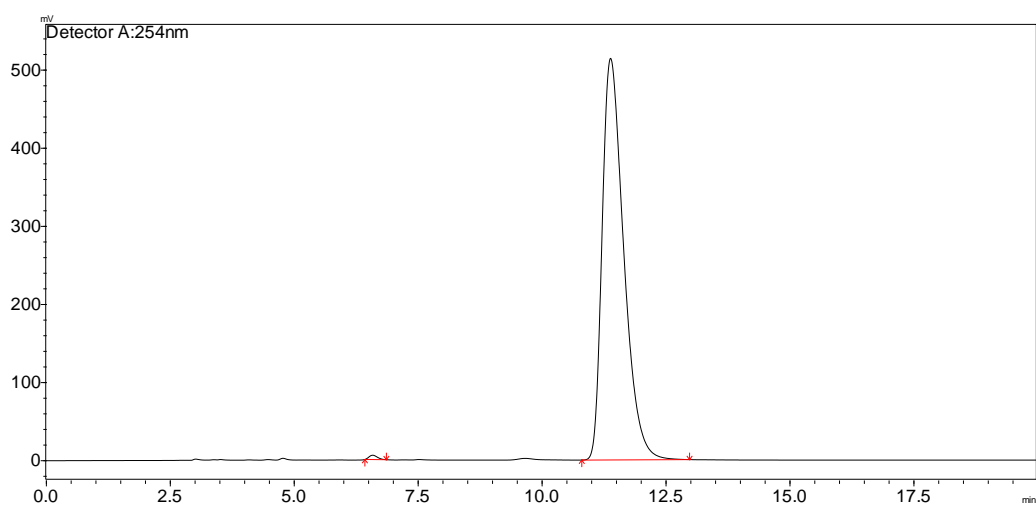

| Peak# | Ret. Time | Area     | Height | Area %  | Height % |
|-------|-----------|----------|--------|---------|----------|
| 1     | 6.578     | 65761    | 5590   | 0.421   | 1.075    |
| 2     | 11.377    | 15537636 | 514194 | 99.579  | 98.925   |
| Total |           | 15603397 | 519784 | 100.000 | 100.000  |

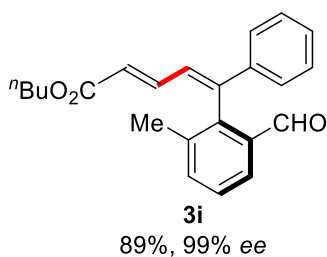

Daicel Chiralpak OD-H column, n-hexane/*i*-PrOH (95/5), 0.5 mL/min, 254 nm, 19.882 min (major enantiomer), 18.111 min (minor enantiomer).

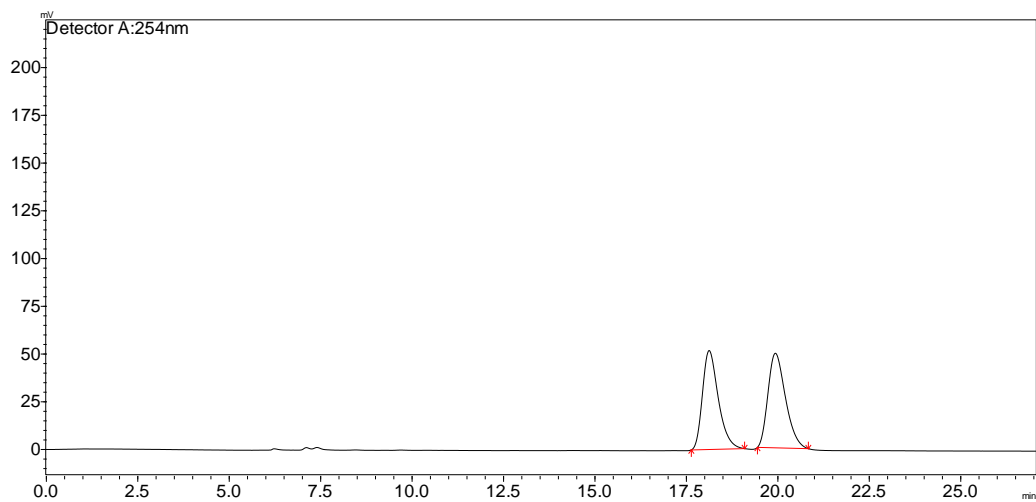

| Peak# | Ret. Time | Area    | Height | Area % | Height % |
|-------|-----------|---------|--------|--------|----------|
| 1     | 18.117    | 1562875 | 51796  | 48.642 | 51.112   |

|       |        |         |        |         |         |
|-------|--------|---------|--------|---------|---------|
| 2     | 19.928 | 1650149 | 49541  | 51.358  | 48.888  |
| Total |        | 3213023 | 101337 | 100.000 | 100.000 |

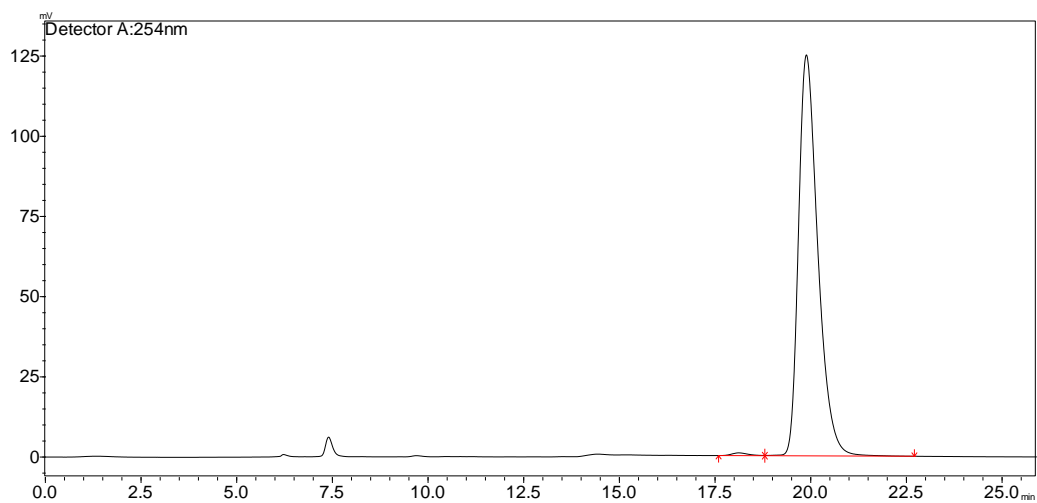

| Peak# | Ret. Time | Area    | Height | Area %  | Height % |
|-------|-----------|---------|--------|---------|----------|
| 1     | 18.111    | 26160   | 857    | 0.592   | 0.681    |
| 2     | 19.882    | 4396054 | 124998 | 99.408  | 99.319   |
| Total |           | 4422215 | 125855 | 100.000 | 100.000  |

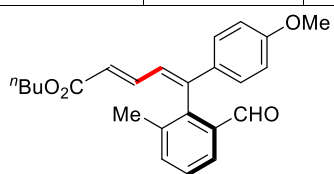

**3j**  
78%, 99% ee

Daicel Chiralpak OD-H column, n-hexane/*i*-PrOH (80/20), 1.0 mL/min, 254 nm, 7.150 min (major enantiomer), 5.690 min (minor enantiomer).

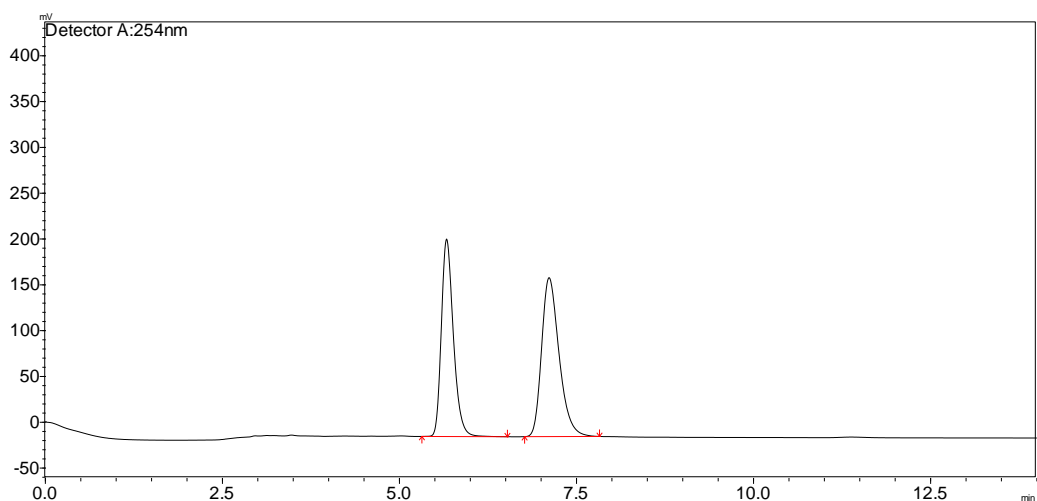

| Peak# | Ret. Time | Area    | Height | Area %  | Height % |
|-------|-----------|---------|--------|---------|----------|
| 1     | 5.661     | 2546292 | 215549 | 46.116  | 55.421   |
| 2     | 7.109     | 2975190 | 173382 | 53.884  | 44.579   |
| Total |           | 5521482 | 388932 | 100.000 | 100.000  |

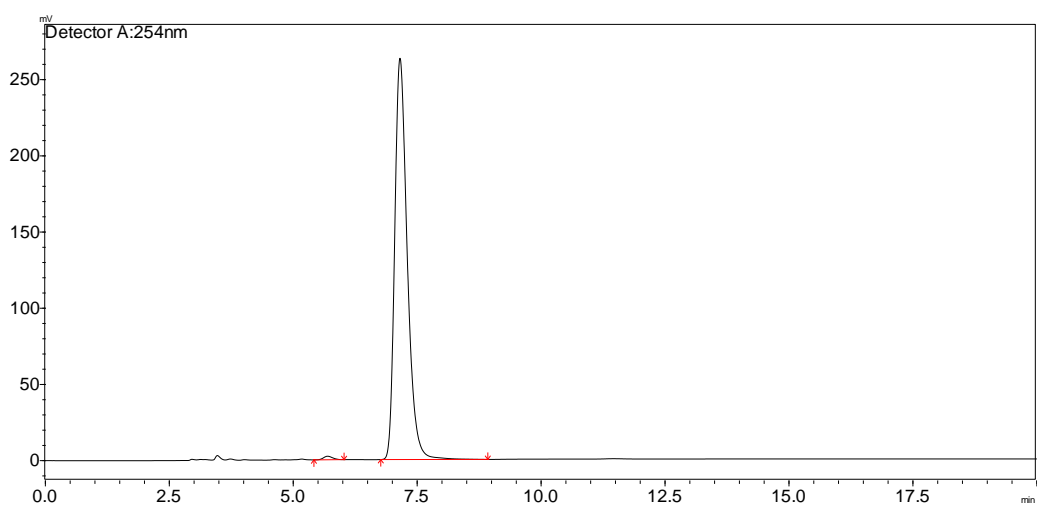

| Peak# | Ret. Time | Area    | Height | Area %  | Height % |
|-------|-----------|---------|--------|---------|----------|
| 1     | 5.690     | 29876   | 2325   | 0.642   | 0.875    |
| 2     | 7.150     | 4626772 | 263272 | 99.358  | 99.125   |
| Total |           | 4656648 | 265597 | 100.000 | 100.000  |

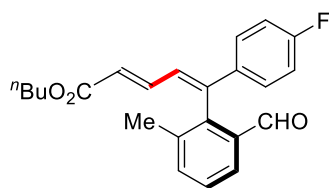

**3k**  
84%, >99% ee

Daicel Chiralpak AD-H column, n-hexane/*i*-PrOH (95/5), 0.5 mL/min, 254 nm, 19.725 min (major enantiomer), 21.934 min (minor enantiomer).

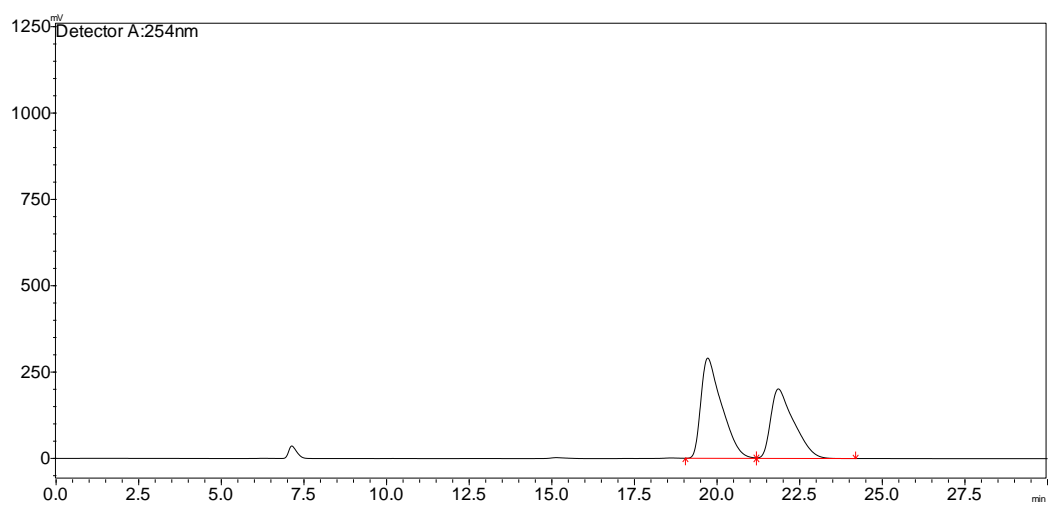



| Peak# | Ret. Time | Area     | Height | Area %  | Height % |
|-------|-----------|----------|--------|---------|----------|
| 1     | 19.714    | 12742432 | 290100 | 56.573  | 59.048   |
| 2     | 21.849    | 9781434  | 201197 | 43.427  | 40.952   |
| Total |           | 22523866 | 491297 | 100.000 | 100.000  |

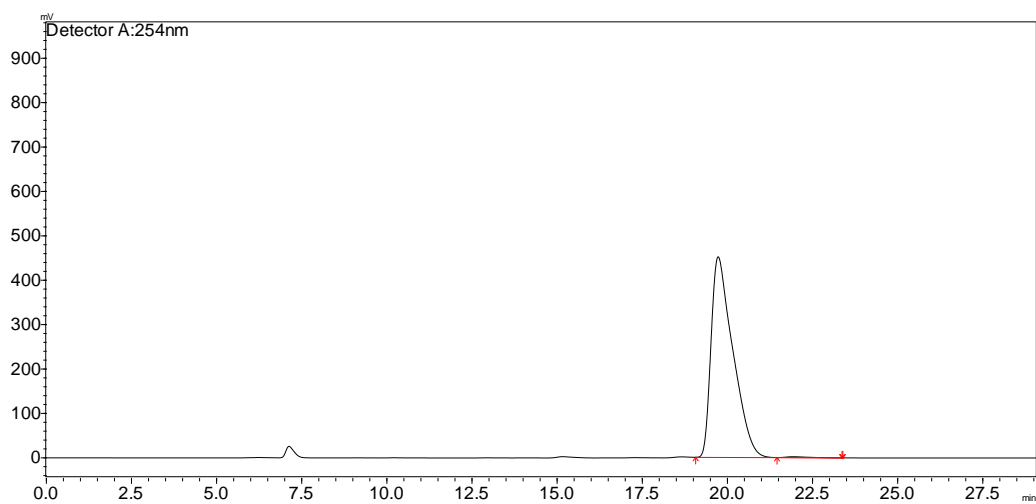

| Peak# | Ret. Time | Area     | Height | Area %  | Height % |
|-------|-----------|----------|--------|---------|----------|
| 1     | 19.725    | 20092675 | 451923 | 99.528  | 99.537   |
| 2     | 21.934    | 95242    | 2104   | 0.472   | 0.463    |
| Total |           | 20187917 | 454026 | 100.000 | 100.000  |

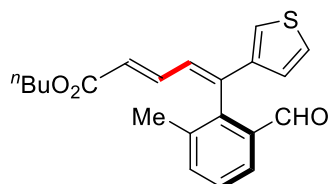

**31**

83%, > 99% ee

Daicel Chiralpak IA-H column, n-hexane/i-PrOH (98/2), 1.0 mL/min, 254 nm, 15.699 min (major enantiomer), 13.717 min (minor enantiomer).

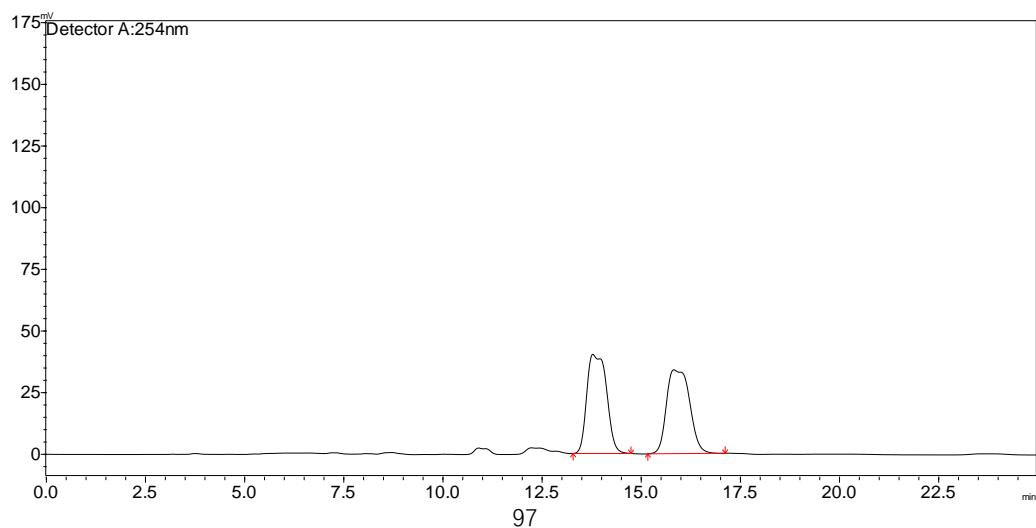

| Peak# | Ret. Time | Area    | Height | Area %  | Height % |
|-------|-----------|---------|--------|---------|----------|
| 1     | 13.774    | 1390985 | 40184  | 50.223  | 54.166   |
| 2     | 15.817    | 1378619 | 34002  | 49.777  | 45.834   |
| Total |           | 2769604 | 74185  | 100.000 | 100.000  |

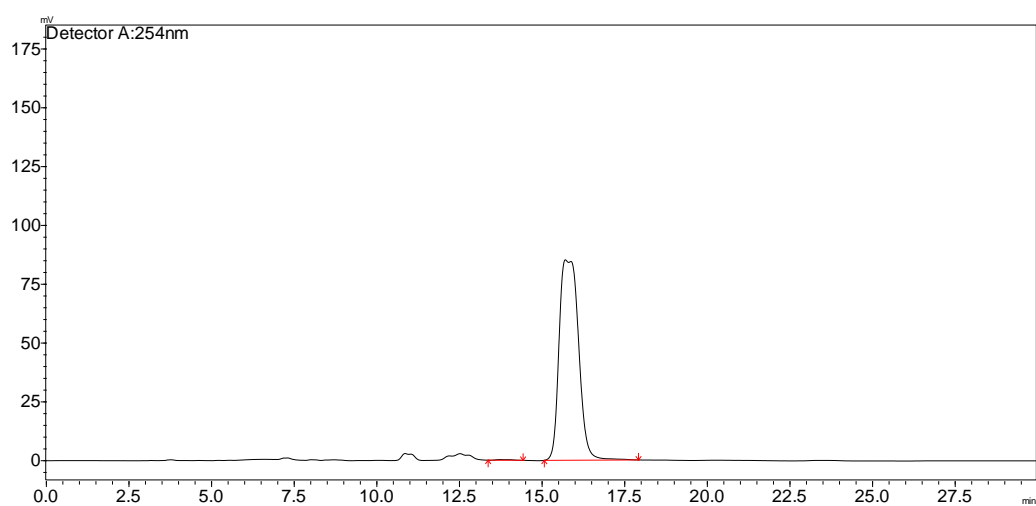

| Peak# | Ret. Time | Area    | Height | Area %  | Height % |
|-------|-----------|---------|--------|---------|----------|
| 1     | 13.717    | 9416    | 281    | 0.270   | 0.328    |
| 2     | 15.699    | 3475404 | 85197  | 99.730  | 99.672   |
| Total |           | 3484820 | 85478  | 100.000 | 100.000  |

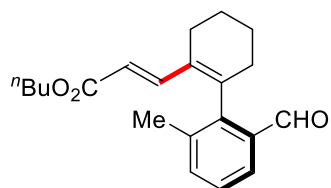

**3m**, 89%, > 99% ee

Daicel Chiralpak OD-H column, n-hexane/*i*-PrOH (97/3), 1.0 mL/min, 254 nm, 13.743 min (major enantiomer), 15.202 min (minor enantiomer).

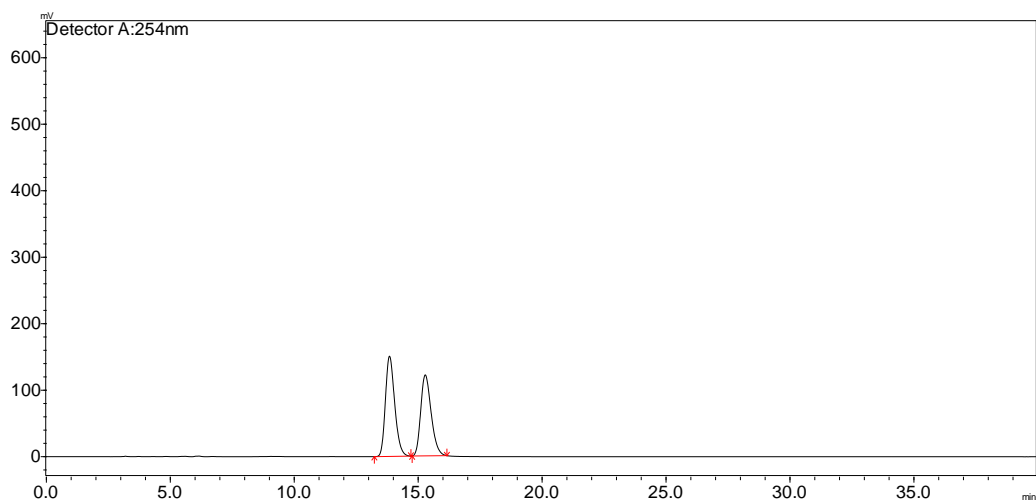

| Peak# | Ret. Time | Area    | Height | Area %  | Height % |
|-------|-----------|---------|--------|---------|----------|
| 1     | 13.839    | 3932061 | 150774 | 52.423  | 55.309   |
| 2     | 15.282    | 3568575 | 121830 | 47.577  | 44.691   |
| Total |           | 7500636 | 272604 | 100.000 | 100.000  |

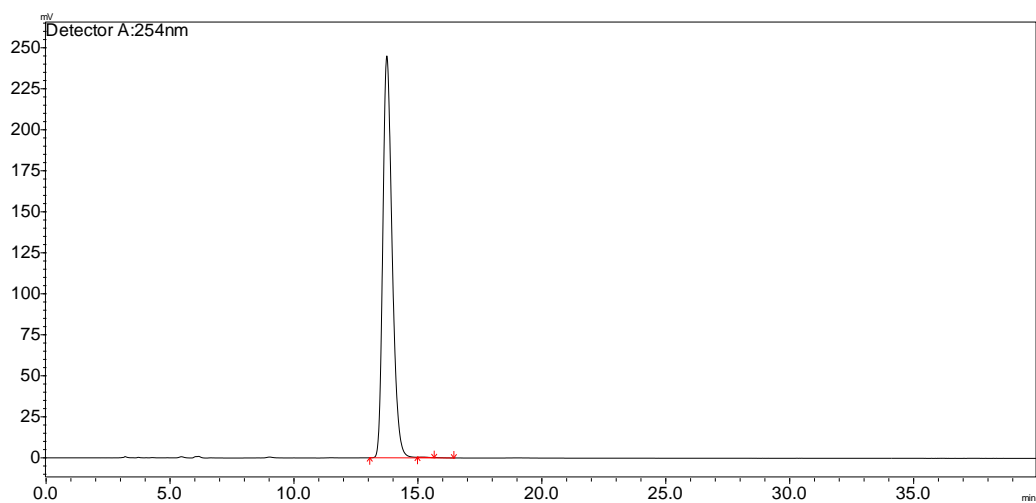

| Peak# | Ret. Time | Area    | Height | Area %  | Height % |
|-------|-----------|---------|--------|---------|----------|
| 1     | 13.743    | 6415936 | 245007 | 99.956  | 99.943   |
| 2     | 15.202    | 2825    | 139    | 0.044   | 0.057    |
| Total |           | 6418761 | 245146 | 100.000 | 100.000  |

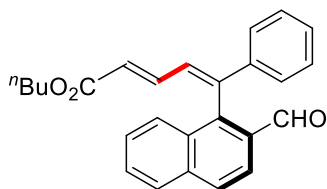

**3n**

75%, 99% ee

Daicel Chiralpak IB-H column, n-hexane/i-PrOH (98/2), 0.5 mL/min, 254 nm, 25.445 min (major enantiomer), 24.646 min (minor enantiomer).

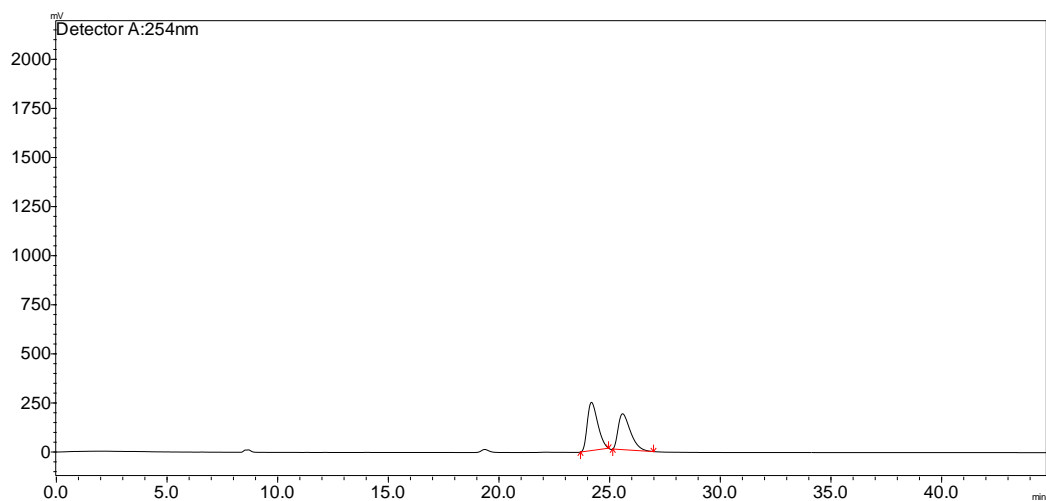

| Peak# | Ret. Time | Area     | Height | Area %  | Height % |
|-------|-----------|----------|--------|---------|----------|
| 1     | 24.175    | 8049665  | 245523 | 53.396  | 57.339   |
| 2     | 25.581    | 7025697  | 182670 | 46.604  | 42.661   |
| Total |           | 15075362 | 428192 | 100.000 | 100.000  |

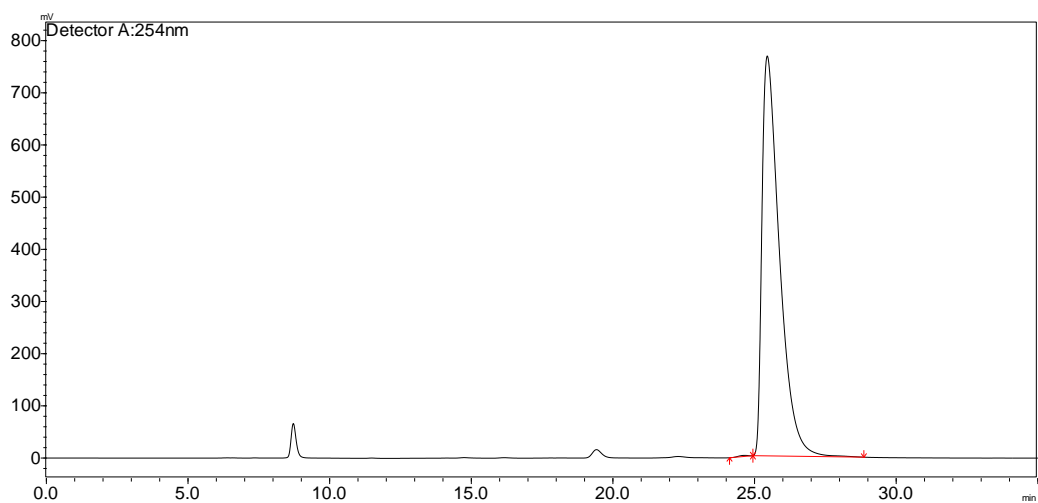

| Peak# | Ret. Time | Area     | Height | Area %  | Height % |
|-------|-----------|----------|--------|---------|----------|
| 1     | 24.646    | 47470    | 2037   | 0.143   | 0.265    |
| 2     | 25.445    | 33066362 | 766455 | 99.857  | 99.735   |
| Total |           | 33113832 | 768492 | 100.000 | 100.000  |

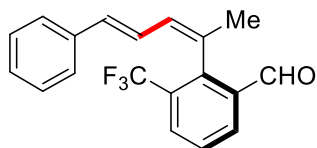

**3o**  
82%, 95% ee

Daicel Chiralpak OD-H column, n-hexane/*i*-PrOH (98/2), 0.5 mL/min, 254 nm, 11.147 min (major enantiomer), 12.985 min (minor enantiomer).

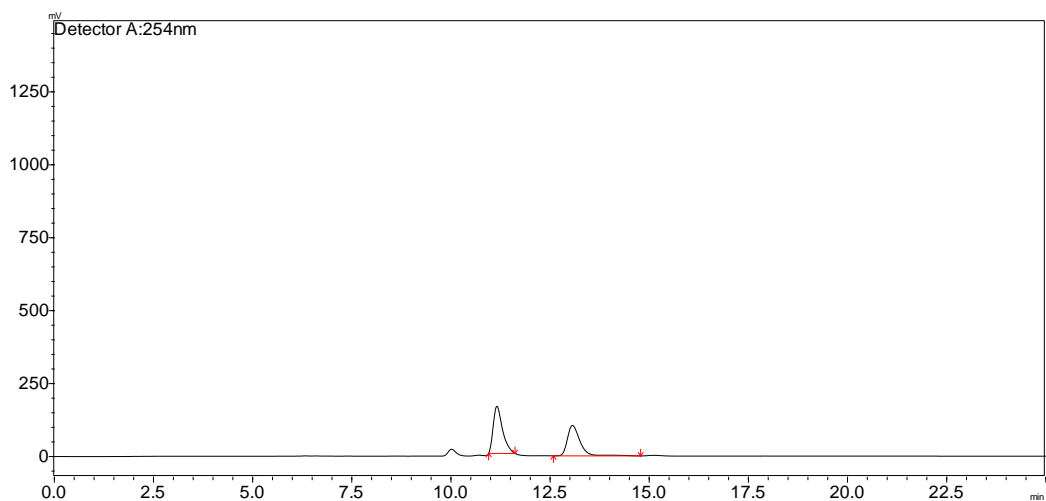

| Peak# | Ret. Time | Area    | Height | Area %  | Height % |
|-------|-----------|---------|--------|---------|----------|
| 1     | 11.155    | 2646575 | 161502 | 53.305  | 60.751   |
| 2     | 13.060    | 2318387 | 104342 | 46.695  | 39.249   |
| Total |           | 4964962 | 265845 | 100.000 | 100.000  |

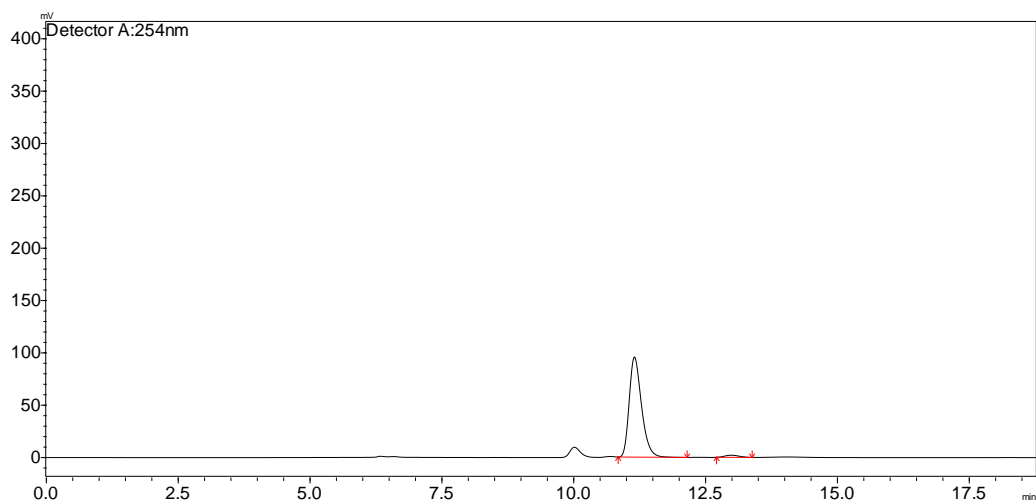

| Peak# | Ret. Time | Area    | Height | Area %  | Height % |
|-------|-----------|---------|--------|---------|----------|
| 1     | 11.147    | 1552971 | 95611  | 97.590  | 97.936   |
| 2     | 12.985    | 38355   | 2015   | 2.410   | 2.064    |
| Total |           | 1591326 | 97626  | 100.000 | 100.000  |

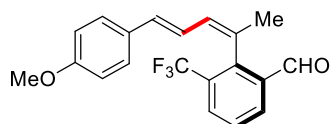

**3p**  
79%, > 99% ee

Daicel Chiralpak OD-H column, n-hexane/i-PrOH (95/5), 1.0 mL/min, 254 nm, 6.247 min (major enantiomer), 9.032 min (minor enantiomer).

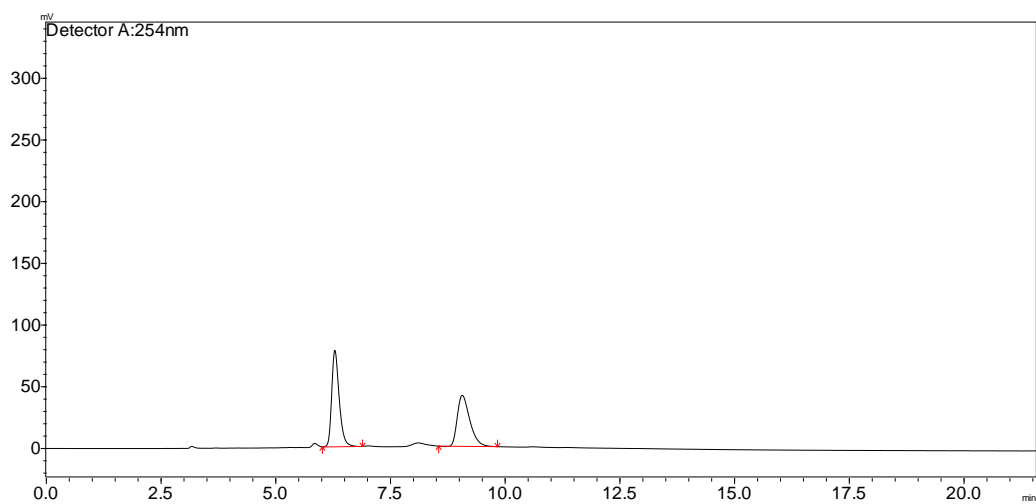

| Peak# | Ret. Time | Area    | Height | Area %  | Height % |
|-------|-----------|---------|--------|---------|----------|
| 1     | 6.283     | 888322  | 78209  | 53.167  | 65.394   |
| 2     | 9.060     | 782489  | 41387  | 46.833  | 34.606   |
| Total |           | 1670812 | 119596 | 100.000 | 100.000  |

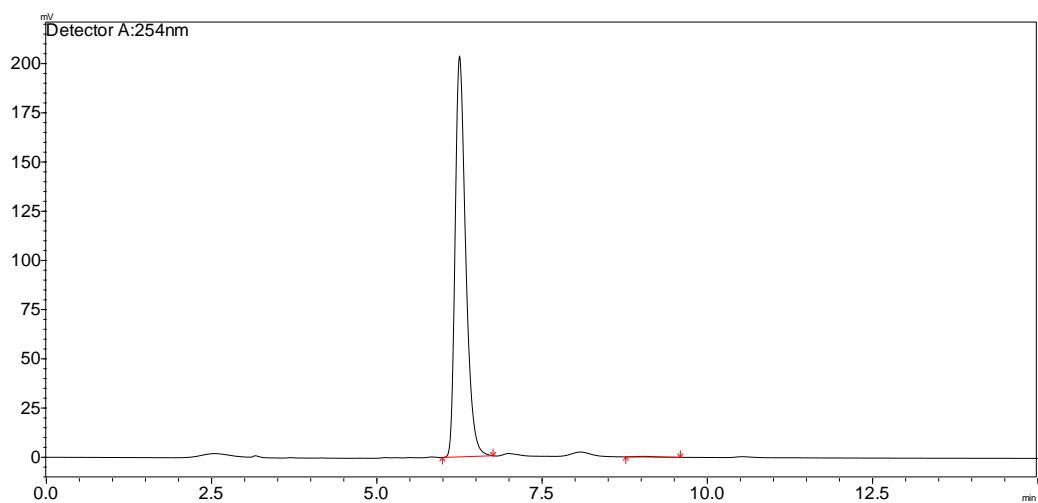

| Peak# | Ret. Time | Area    | Height | Area %  | Height % |
|-------|-----------|---------|--------|---------|----------|
| 1     | 6.247     | 2266521 | 203698 | 99.729  | 99.839   |
| 2     | 9.032     | 6162    | 329    | 0.271   | 0.161    |
| Total |           | 2272683 | 204027 | 100.000 | 100.000  |

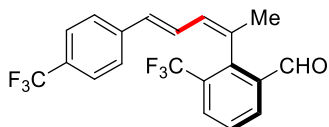

**3q**  
76%, > 99% ee

Daicel Chiralpak AD-H column, n-hexane/*i*-PrOH (99.2/0.8), 1.0 mL/min, 254 nm, 6.952 min (major enantiomer), 8.784 min (minor enantiomer).

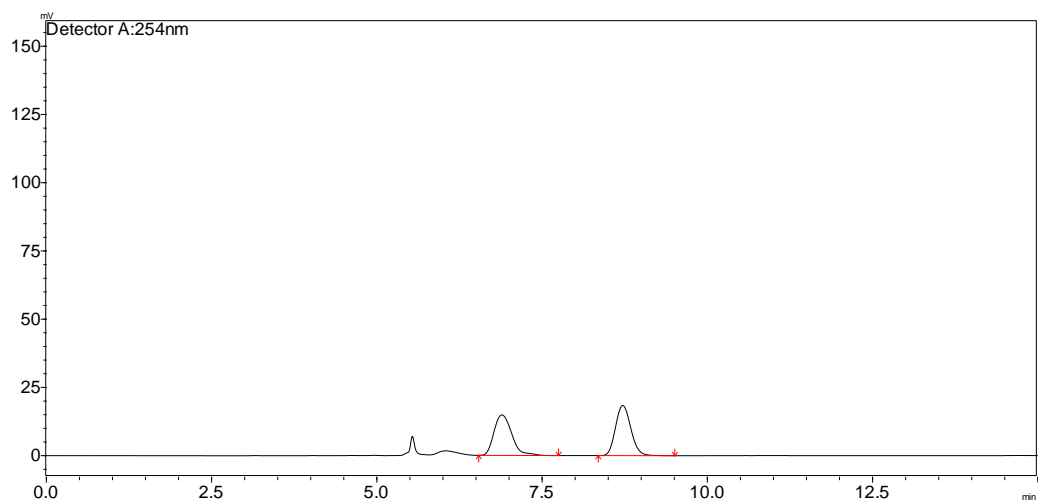

| Peak# | Ret. Time | Area   | Height | Area %  | Height % |
|-------|-----------|--------|--------|---------|----------|
| 1     | 6.887     | 278351 | 14849  | 48.438  | 44.704   |
| 2     | 8.716     | 296303 | 18367  | 51.562  | 55.296   |
| Total |           | 574654 | 33216  | 100.000 | 100.000  |

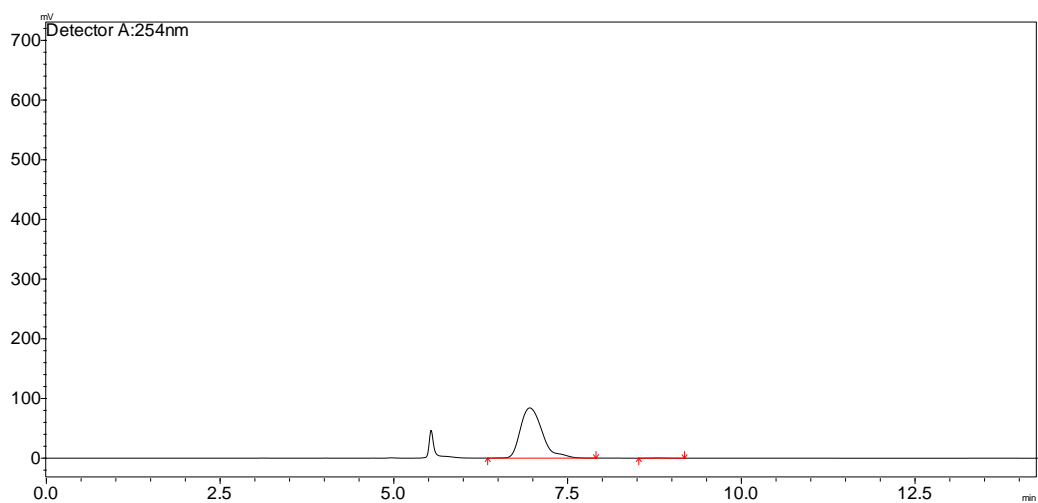

| Peak# | Ret. Time | Area    | Height | Area %  | Height % |
|-------|-----------|---------|--------|---------|----------|
| 1     | 6.952     | 1840832 | 84104  | 99.746  | 99.637   |
| 2     | 8.784     | 4687    | 306    | 0.254   | 0.363    |
| Total |           | 1845519 | 84410  | 100.000 | 100.000  |

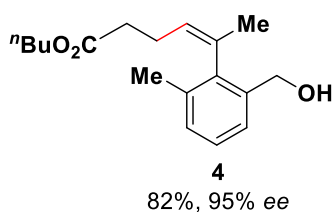

Daicel Chiralpak OD-H column, n-hexane/*i*-PrOH (97/3), 1.0 mL/min, 210 nm, 9.896 min (major enantiomer), 11.192 min (minor enantiomer).

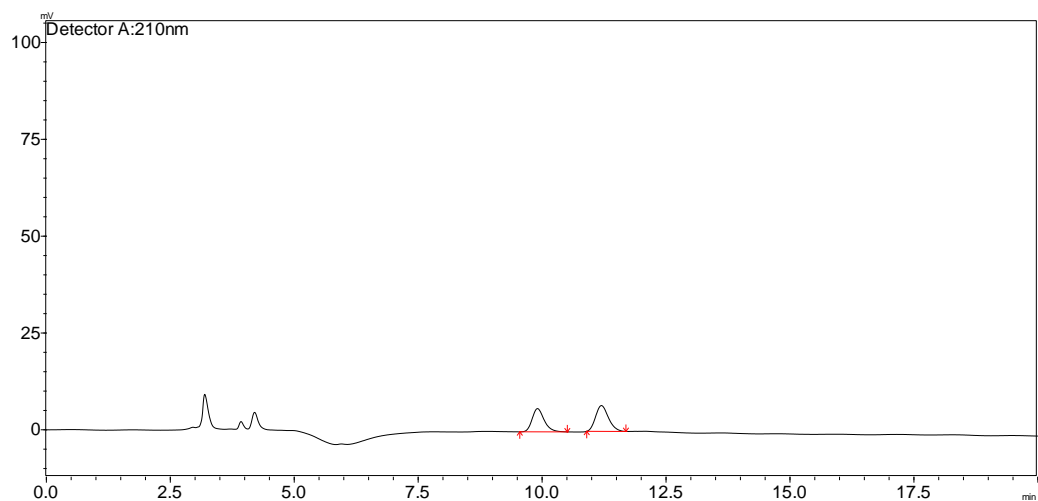

| Peak# | Ret. Time | Area   | Height | Area %  | Height % |
|-------|-----------|--------|--------|---------|----------|
| 1     | 9.903     | 101256 | 6005   | 45.656  | 47.387   |
| 2     | 11.192    | 120526 | 6668   | 54.344  | 52.613   |
| Total |           | 221782 | 12673  | 100.000 | 100.000  |

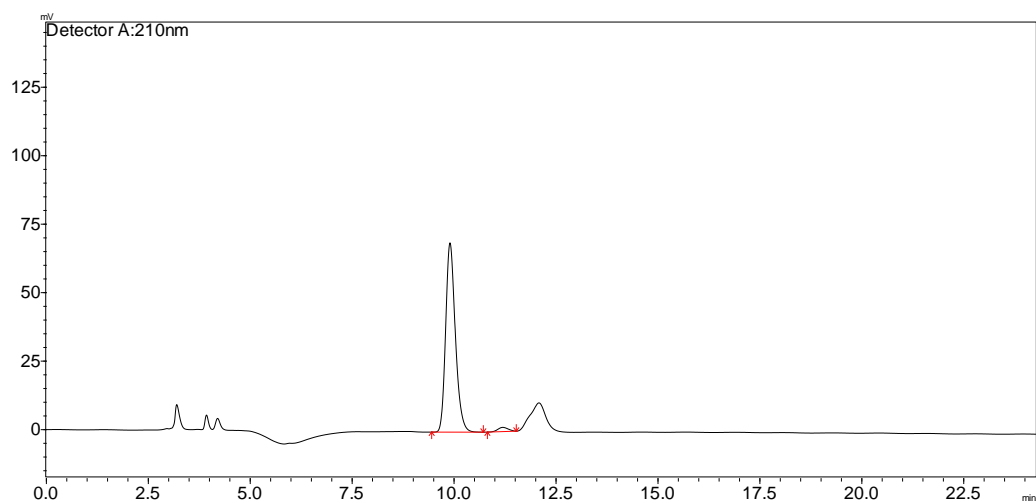

| Peak# | Ret. Time | Area    | Height | Area %  | Height % |
|-------|-----------|---------|--------|---------|----------|
| 1     | 9.896     | 1143407 | 69119  | 97.656  | 97.815   |
| 2     | 11.192    | 27443   | 1544   | 2.344   | 2.185    |
| Total |           | 1170850 | 70663  | 100.000 | 100.000  |

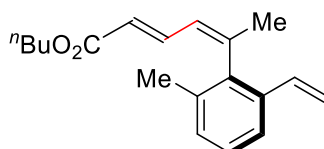

**5**  
88%, 88% ee

Daicel Chiralpak OB-H column, n-hexane/*i*-PrOH (99.2/0.8), 0.5 mL/min, 254 nm, 16.436 min (major enantiomer), 11.784 min (minor enantiomer).



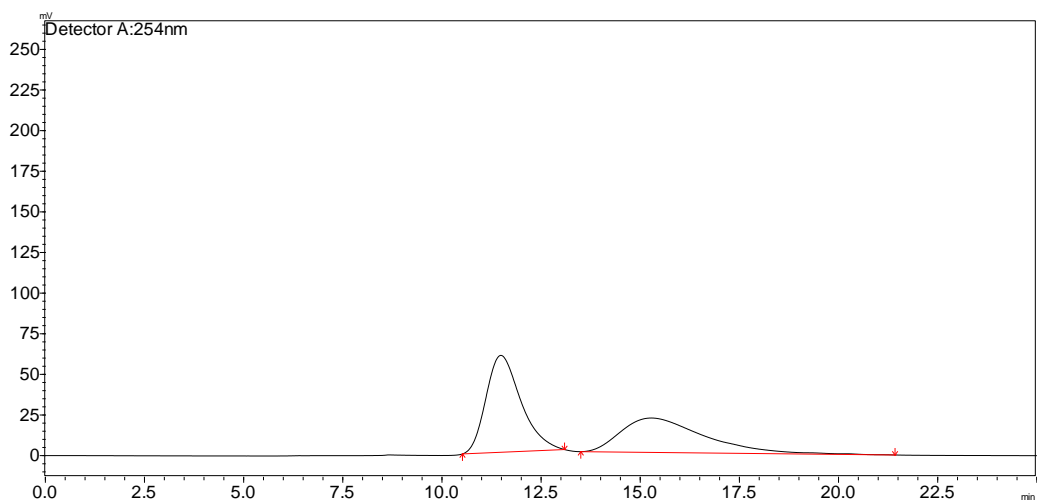

| Peak# | Ret. Time | Area    | Height | Area %  | Height % |
|-------|-----------|---------|--------|---------|----------|
| 1     | 11.482    | 3653776 | 59645  | 54.167  | 73.818   |
| 2     | 15.275    | 3091634 | 21155  | 45.833  | 26.182   |
| Total |           | 6745410 | 80800  | 100.000 | 100.000  |

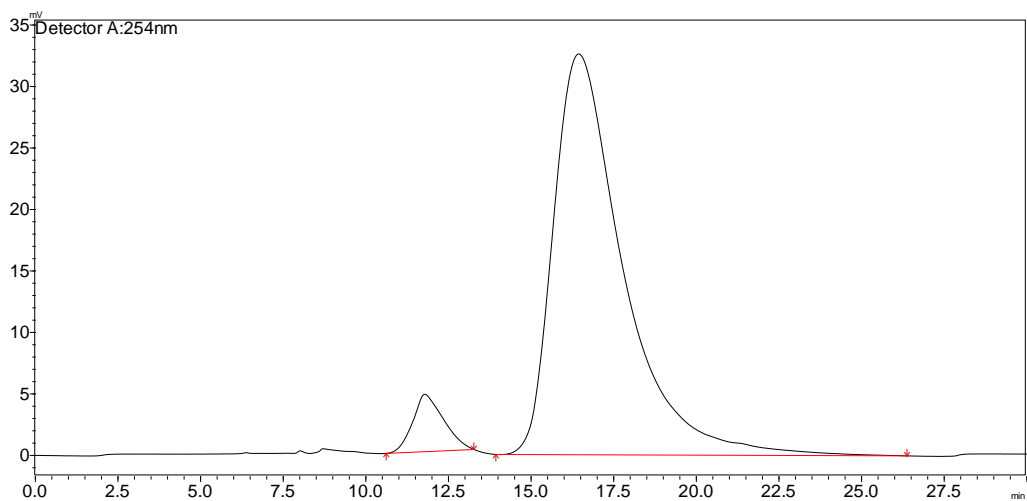

| Peak# | Ret. Time | Area    | Height | Area %  | Height % |
|-------|-----------|---------|--------|---------|----------|
| 1     | 11.784    | 302091  | 4667   | 5.951   | 12.527   |
| 2     | 16.436    | 4774257 | 32592  | 94.049  | 87.473   |
| Total |           | 5076348 | 37259  | 100.000 | 100.000  |

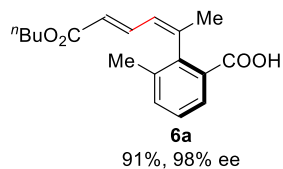

Daicel Chiralpak OD-H column, n-hexane/*i*-PrOH (60/40), 1.0 mL/min, 254 nm, 5.768 min (major enantiomer), 27.319 min (minor enantiomer).

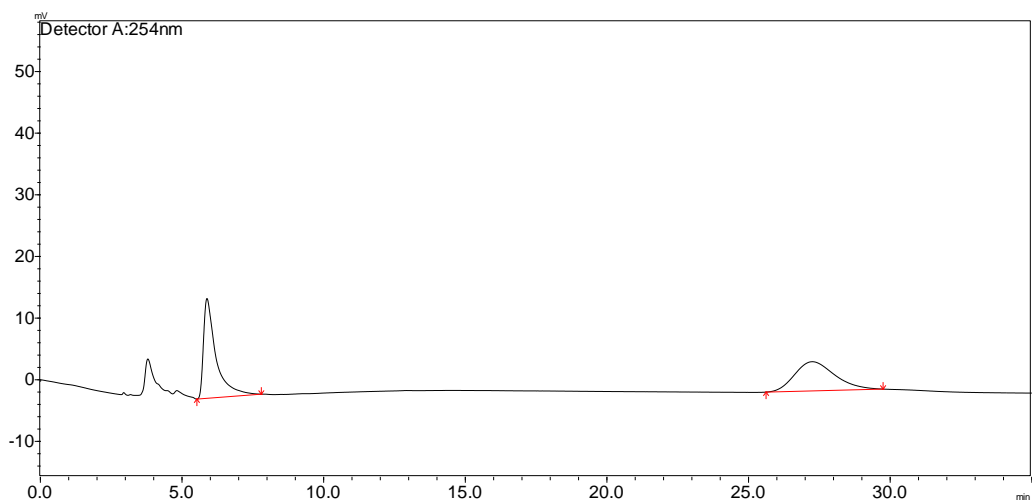

| Peak# | Ret. Time | Area   | Height | Area %  | Height % |
|-------|-----------|--------|--------|---------|----------|
| 1     | 5.878     | 497022 | 16196  | 51.585  | 77.359   |
| 2     | 27.248    | 466471 | 4740   | 48.415  | 22.641   |
| Total |           | 963493 | 20935  | 100.000 | 100.000  |

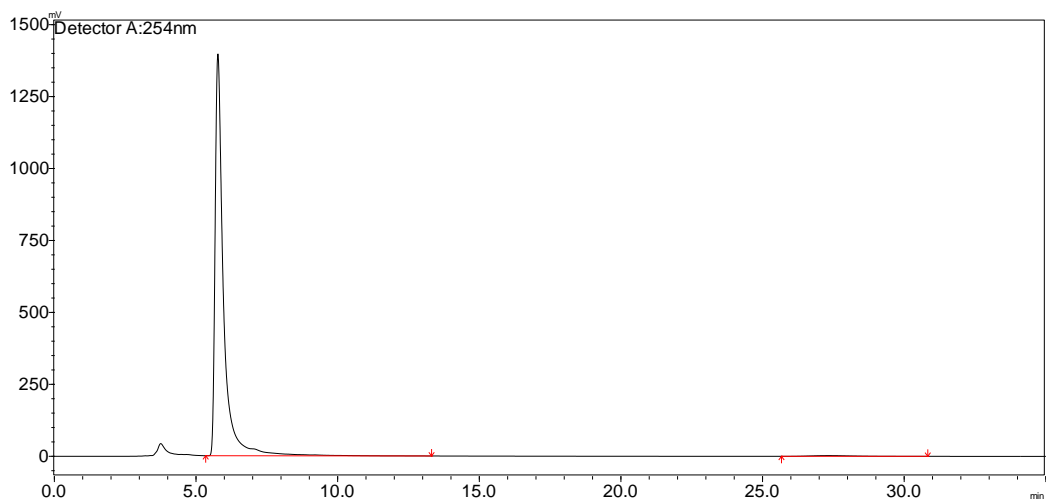

| Peak# | Ret. Time | Area     | Height  | Area %  | Height % |
|-------|-----------|----------|---------|---------|----------|
| 1     | 5.768     | 28987269 | 1396035 | 99.074  | 99.819   |
| 2     | 27.319    | 270933   | 2533    | 0.926   | 0.181    |
| Total |           | 29258202 | 1398569 | 100.000 | 100.000  |

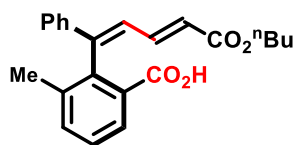

**6b, 86%, 99% ee**

Daicel Chiralpak AD-H column, n-hexane/i-PrOH (60/40), 1 mL/min, 254 nm,  
5.918 min (major enantiomer), 4.552 min (minor enantiomer).

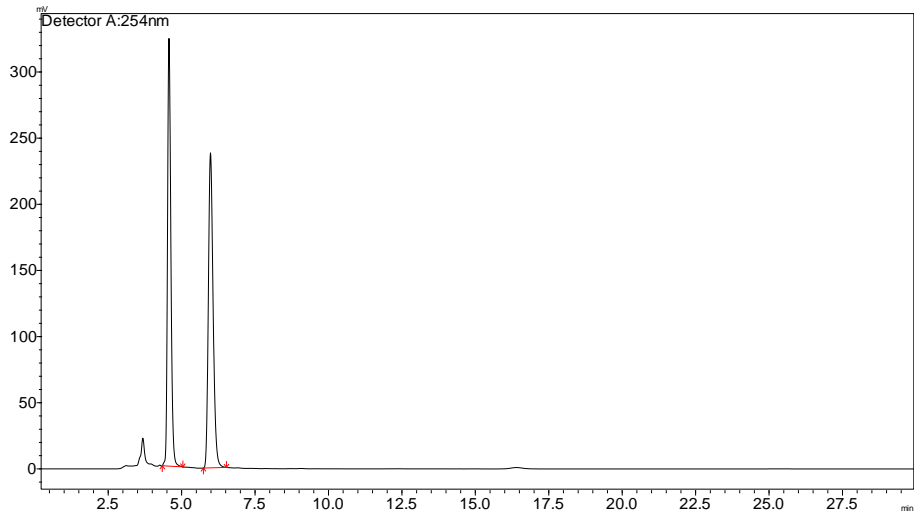

| Peak # | Ret. Time | Area  | Height | Area % | Height % |
|--------|-----------|-------|--------|--------|----------|
| 1      | 4.566     | 25559 | 32332  | 48.902 | 57.593   |
| 2      | 5.978     | 26707 | 23807  | 51.098 | 42.407   |
| Total  |           | 52266 | 56139  | 100.00 | 100.00   |

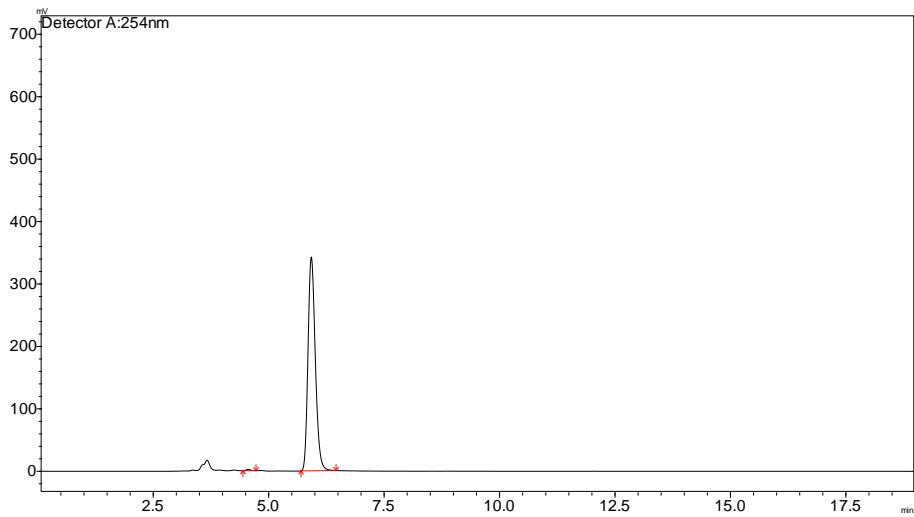

| Peak # | Ret. Time | Area | Height | Area % | Height % |
|--------|-----------|------|--------|--------|----------|
|        |           |      |        |        |          |

|               |       |             |            |             |             |
|---------------|-------|-------------|------------|-------------|-------------|
| 1             | 4.552 | 13999       | 2072       | 0.370       | 0.601       |
| 2             | 5.918 | 37689       | 34243      | 99.630      | 99.399      |
|               |       | 07          | 9          |             |             |
| T<br>ot<br>al |       | 37829<br>06 | 34451<br>0 | 100.00<br>0 | 100.00<br>0 |

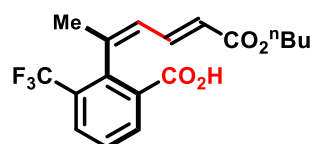

**6c, 91%, 99% ee**

Daicel Chiralpak OD-H column, n-hexane/i-PrOH (50/50), 1 mL/min, 254 nm, 9.684 min (major enantiomer), 57.209 min (minor enantiomer).

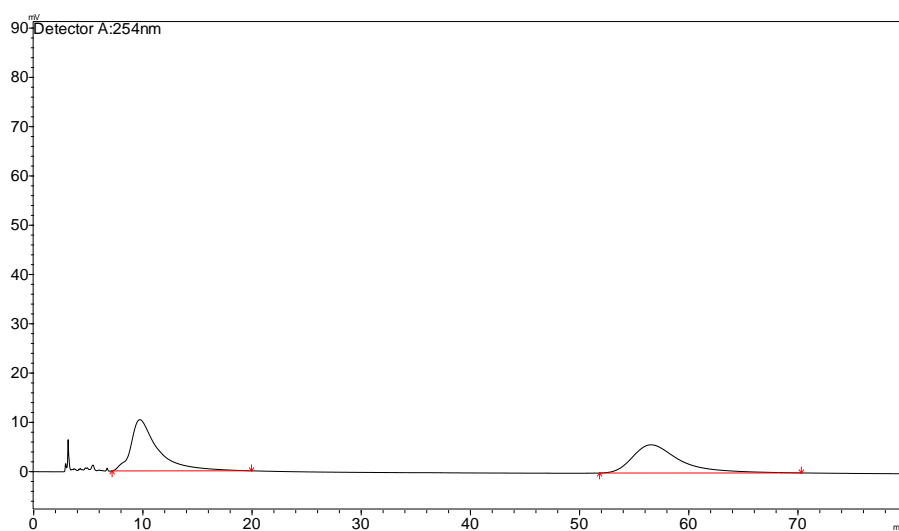

| P<br>e<br>a<br>k<br># | Ret.<br>Time | Area        | Height | Area<br>%   | Height<br>% |
|-----------------------|--------------|-------------|--------|-------------|-------------|
| 1                     | 9.719        | 18025<br>38 | 10405  | 51.024      | 64.523      |
| 2                     | 56.533       | 17301<br>82 | 5721   | 48.976      | 35.477      |
| T<br>ot<br>al         |              | 35327<br>20 | 16127  | 100.00<br>0 | 100.00<br>0 |

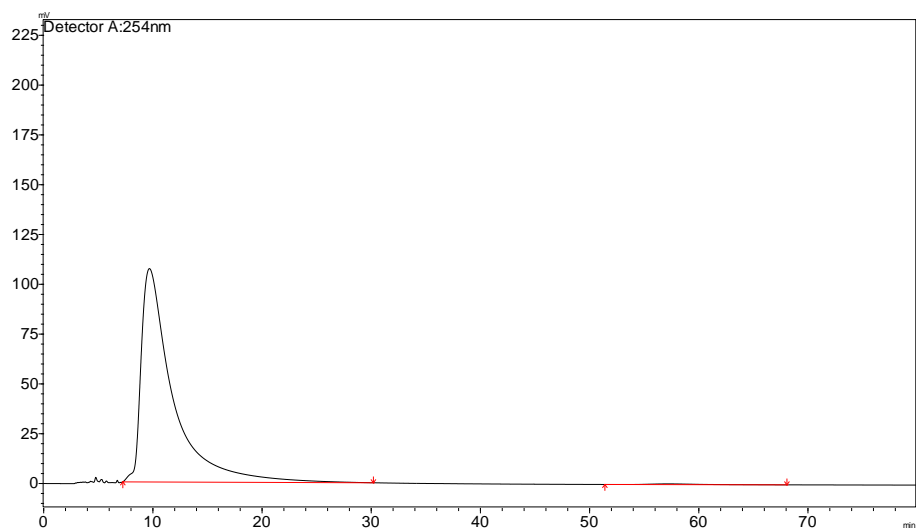

| Peak # | Ret. Time | Area         | Height     | Area %      | Height %    |
|--------|-----------|--------------|------------|-------------|-------------|
| 1      | 9.684     | 21607<br>297 | 10711<br>8 | 99.505      | 99.662      |
| 2      | 57.209    | 10744<br>4   | 363        | 0.495       | 0.338       |
| Total  |           | 21714<br>740 | 10748<br>1 | 100.00<br>0 | 100.00<br>0 |

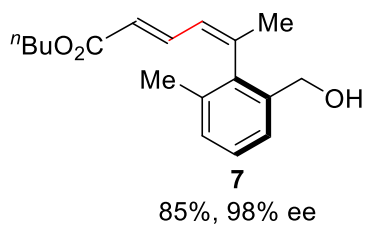

Daicel Chiralpak OD-H column, n-hexane/*i*-PrOH (60/40), 1.0 mL/min, 254 nm, 6.121 min (major enantiomer), 15.077 min (minor enantiomer).

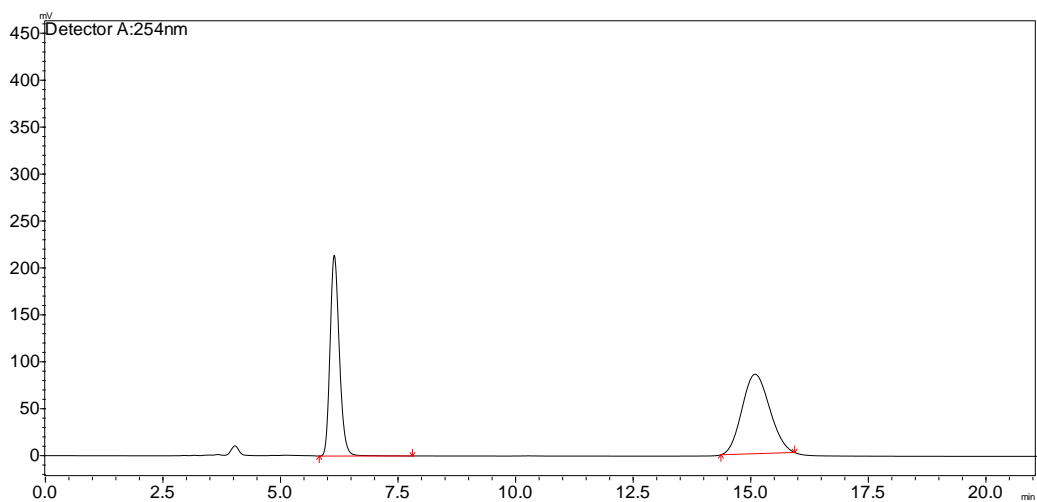

| Peak# | Ret. Time | Area    | Height | Area %  | Height % |
|-------|-----------|---------|--------|---------|----------|
| 1     | 6.139     | 2941922 | 214011 | 45.901  | 71.653   |
| 2     | 15.088    | 3467414 | 84665  | 54.099  | 28.347   |
| Total |           | 6409336 | 298676 | 100.000 | 100.000  |

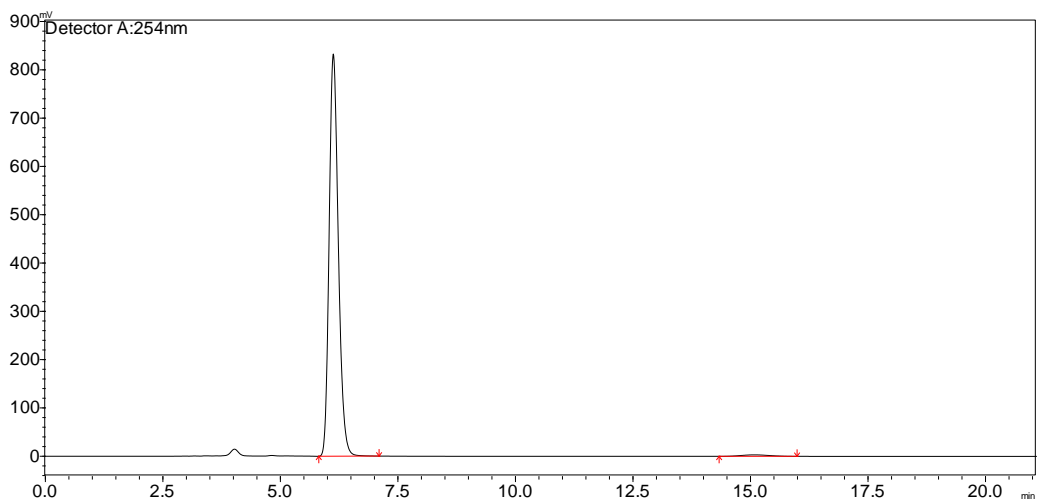

| Peak# | Ret. Time | Area     | Height | Area %  | Height % |
|-------|-----------|----------|--------|---------|----------|
| 1     | 6.121     | 11333655 | 832826 | 98.903  | 99.640   |
| 2     | 15.077    | 125669   | 3011   | 1.097   | 0.360    |
| Total |           | 11459323 | 835837 | 100.000 | 100.000  |

## 11.2 Copies of HPLC Analysis for 12 with different CCAs

### *6c-rac* as ligand

Daicel Chiralpak IA column, n-hexane/i-PrOH (80/20), 1.0 mL/min, 254 nm, 17.130min (major enantiomer), 37.385 min (minor enantiomer).

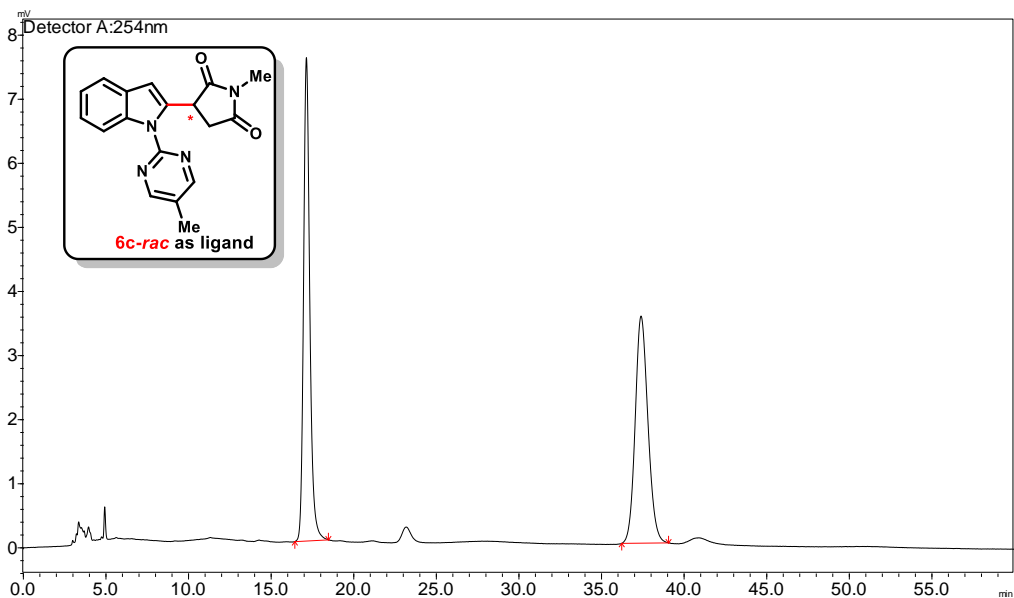

| Peak # | Ret. Time | Area   | Height | Area %  | Height % |
|--------|-----------|--------|--------|---------|----------|
| 1      | 17.130    | 197209 | 7543   | 50.911  | 68.037   |
| 2      | 37.385    | 190152 | 3544   | 49.089  | 31.963   |
| Total  |           | 387361 | 11087  | 100.000 | 100.000  |

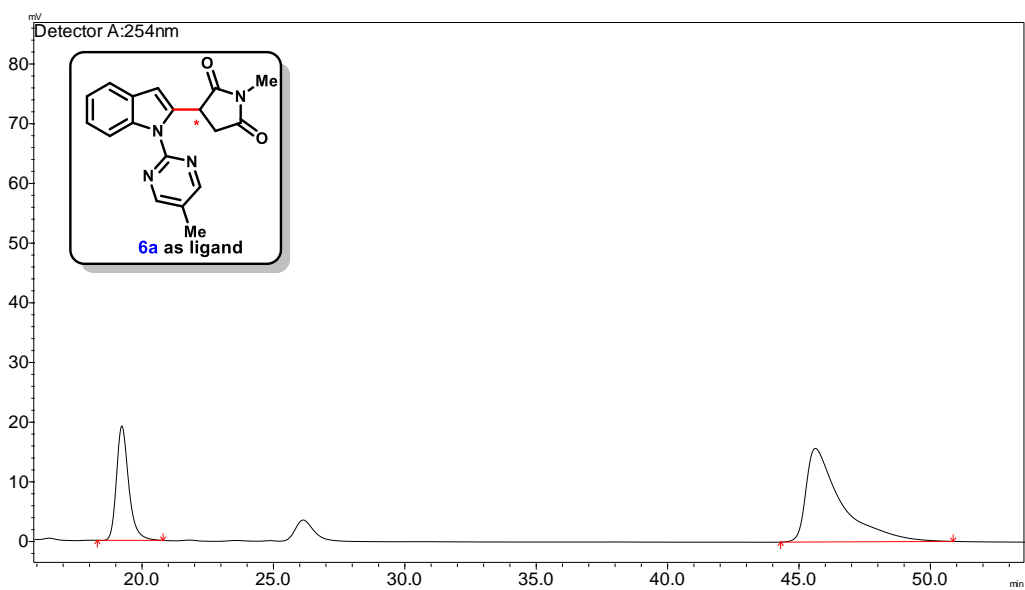

| P | Ret. | Area | Height | Area % | Height |
|---|------|------|--------|--------|--------|
|---|------|------|--------|--------|--------|

| Peak # | Time   |             |       |             | %           |
|--------|--------|-------------|-------|-------------|-------------|
| 1      | 19.227 | 628966      | 19198 | 30.125      | 55.053      |
| 2      | 45.617 | 145890<br>4 | 15674 | 69.875      | 44.947      |
| Total  |        | 208787<br>0 | 34872 | 100.00<br>0 | 100.00<br>0 |

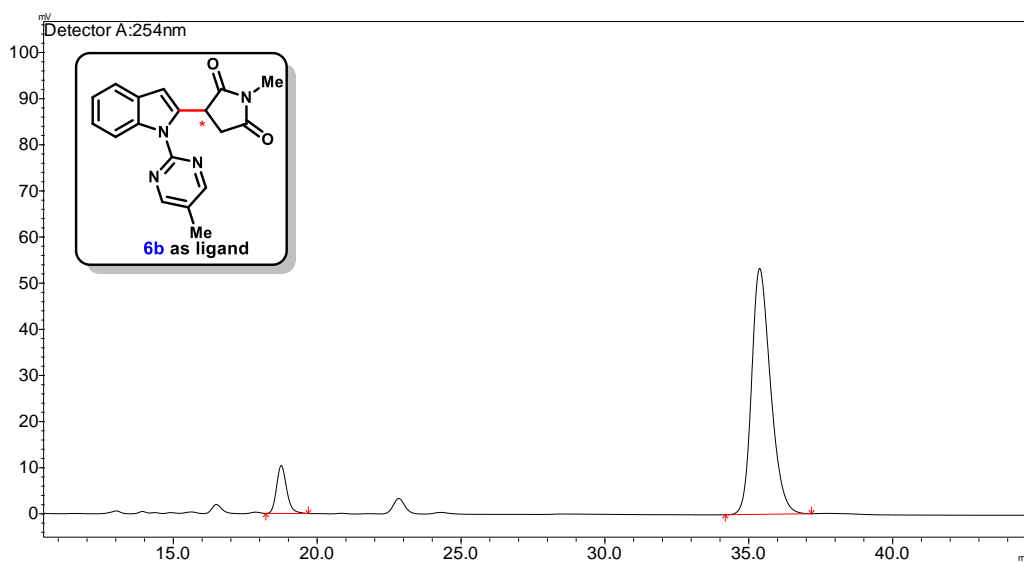

| Peak # | Ret. Time | Area        | Height | Area %      | Height %    |
|--------|-----------|-------------|--------|-------------|-------------|
| 1      | 18.746    | 248725      | 10326  | 9.270       | 16.218      |
| 2      | 35.375    | 243431<br>2 | 53346  | 90.730      | 83.782      |
| Total  |           | 268303<br>7 | 63672  | 100.00<br>0 | 100.00<br>0 |



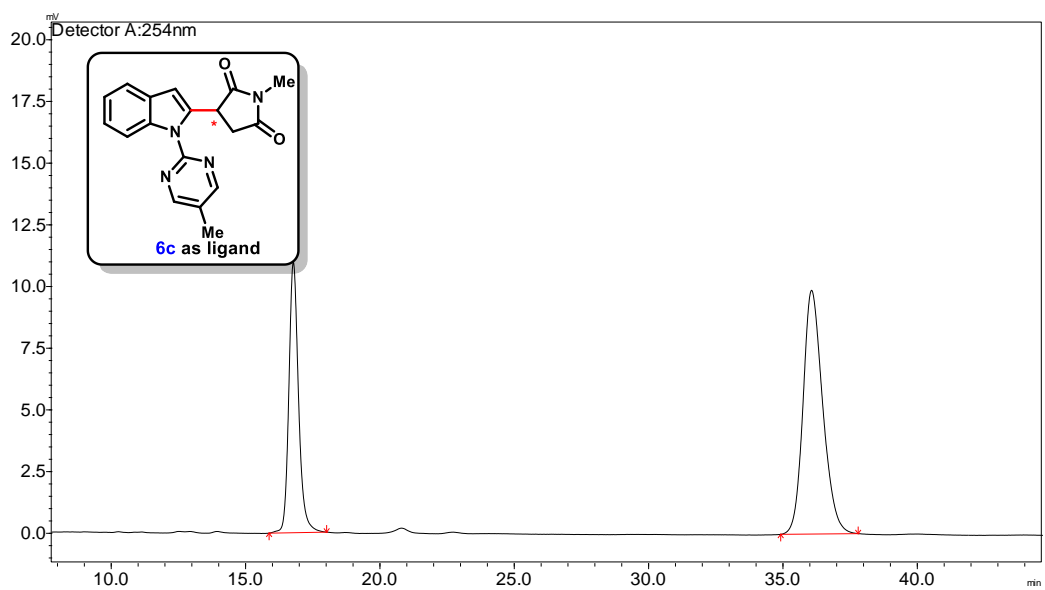

| Peak # | Ret. Time | Area   | Height | Area %  | Height % |
|--------|-----------|--------|--------|---------|----------|
| 1      | 16.773    | 274479 | 10968  | 35.269  | 52.615   |
| 2      | 36.063    | 503764 | 9878   | 64.731  | 47.385   |
| Total  |           | 778243 | 20846  | 100.000 | 100.000  |

## 12. X-ray Crystallography

Single crystal of compound **3e**:

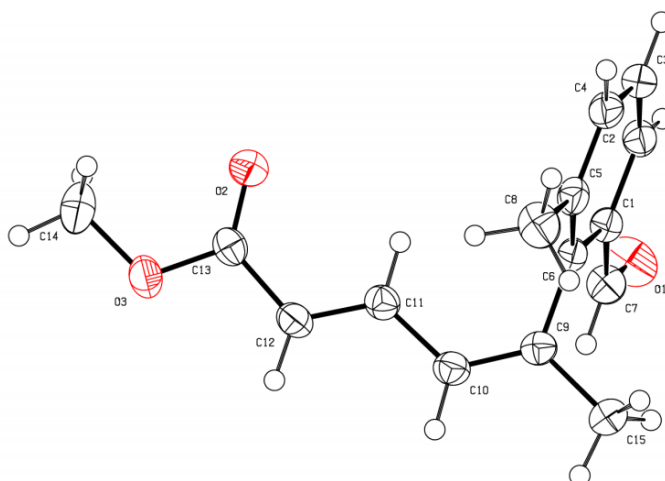

**Table S5 Crystal data and structure refinement for 3e.**

|                                             |                                                               |
|---------------------------------------------|---------------------------------------------------------------|
| Empirical formula                           | C <sub>15</sub> H <sub>16</sub> O <sub>3</sub>                |
| Formula weight                              | 244.28                                                        |
| Temperature/K                               | 170.0                                                         |
| Crystal system                              | orthorhombic                                                  |
| Space group                                 | P2 <sub>1</sub> 2 <sub>1</sub> 2                              |
| a/Å                                         | 8.8975(4)                                                     |
| b/Å                                         | 21.5517(9)                                                    |
| c/Å                                         | 6.9771(3)                                                     |
| α/°                                         | 90                                                            |
| β/°                                         | 90                                                            |
| γ/°                                         | 90                                                            |
| Volume/Å <sup>3</sup>                       | 1337.90(10)                                                   |
| Z                                           | 4                                                             |
| ρ <sub>calc</sub> /g/cm <sup>3</sup>        | 1.213                                                         |
| μ/mm <sup>-1</sup>                          | 0.679                                                         |
| F(000)                                      | 520.0                                                         |
| Crystal size/mm <sup>3</sup>                | 0.48 × 0.32 × 0.07                                            |
| Radiation                                   | CuKα (λ = 1.54178)                                            |
| 2θ range for data collection/°              | 10.756 to 145.002                                             |
| Index ranges                                | -11 ≤ h ≤ 9, -20 ≤ k ≤ 26, -8 ≤ l ≤ 7                         |
| Reflections collected                       | 11542                                                         |
| Independent reflections                     | 2628 [R <sub>int</sub> = 0.0309, R <sub>sigma</sub> = 0.0246] |
| Data/restraints/parameters                  | 2628/0/166                                                    |
| Goodness-of-fit on F <sup>2</sup>           | 1.070                                                         |
| Final R indexes [I ≥ 2σ (I)]                | R <sub>1</sub> = 0.0294, wR <sub>2</sub> = 0.0732             |
| Final R indexes [all data]                  | R <sub>1</sub> = 0.0308, wR <sub>2</sub> = 0.0744             |
| Largest diff. peak/hole / e Å <sup>-3</sup> | 0.11/-0.14                                                    |
| Flack parameter                             | -0.04(6)                                                      |

**Table S6. Fractional Atomic Coordinates (×10<sup>4</sup>) and Equivalent Isotropic Displacement Parameters (Å<sup>2</sup>×10<sup>3</sup>) for 3e. U<sub>eq</sub> is defined as 1/3 of the trace of the orthogonalised U<sub>ij</sub> tensor.**

| Atom | x          | y         | z           | U(eq)   |
|------|------------|-----------|-------------|---------|
| O1   | 3276.7(17) | 1601.0(6) | 6478(2)     | 51.5(4) |
| O2   | 5389.9(15) | 4233.2(6) | 10909.4(18) | 36.4(3) |
| O3   | 7391.1(15) | 4731.4(6) | 9701(2)     | 38.7(3) |
| C1   | 1951.7(18) | 2546.7(7) | 6897(2)     | 27.5(3) |
| C2   | 1007.2(19) | 2305.1(8) | 8309(2)     | 31.5(4) |
| C3   | -40(2)     | 2681.4(9) | 9175(2)     | 35.0(4) |
| C4   | -160.0(19) | 3299.6(8) | 8636(3)     | 33.7(4) |

|     |            |            |          |         |
|-----|------------|------------|----------|---------|
| C5  | 758.5(18)  | 3553.3(8)  | 7224(2)  | 29.7(4) |
| C6  | 1843.7(18) | 3172.6(7)  | 6349(2)  | 25.4(3) |
| C7  | 3082(2)    | 2133.4(8)  | 6008(3)  | 34.0(4) |
| C8  | 580(2)     | 4223.1(8)  | 6667(3)  | 41.2(4) |
| C9  | 2829.6(19) | 3430.1(7)  | 4800(2)  | 27.8(3) |
| C10 | 4096(2)    | 3743.3(8)  | 5190(3)  | 30.5(4) |
| C11 | 4595.6(19) | 3888.4(7)  | 7113(2)  | 28.7(3) |
| C12 | 5811.4(19) | 4227.9(8)  | 7541(3)  | 32.5(4) |
| C13 | 6139.5(19) | 4385.5(7)  | 9543(3)  | 29.3(4) |
| C14 | 7769(2)    | 4920.3(10) | 11628(3) | 46.5(5) |
| C15 | 2275(2)    | 3334.7(9)  | 2796(3)  | 35.7(4) |

**Table S7. Anisotropic Displacement Parameters ( $\text{\AA}^2 \times 10^3$ ) for 3e. The Anisotropic displacement factor exponent takes the form:  $-2\pi^2[h^2a^2U_{11}+2hka*b*U_{12}+\dots]$ .**

| Atom | $U_{11}$ | $U_{22}$ | $U_{33}$ | $U_{23}$ | $U_{13}$ | $U_{12}$ |
|------|----------|----------|----------|----------|----------|----------|
| O1   | 52.7(8)  | 31.3(7)  | 70.5(10) | 6.5(7)   | 11.5(8)  | 10.5(6)  |
| O2   | 39.0(7)  | 37.3(6)  | 33.0(6)  | 2.2(5)   | 2.6(5)   | -5.0(5)  |
| O3   | 31.0(7)  | 40.5(7)  | 44.7(7)  | -6.5(6)  | 0.2(5)   | -9.0(5)  |
| C1   | 27.9(8)  | 27.4(8)  | 27.2(7)  | -2.2(6)  | -0.9(6)  | -1.7(6)  |
| C2   | 32.1(9)  | 31.3(8)  | 31.0(8)  | 1.4(6)   | -2.3(7)  | -5.2(7)  |
| C3   | 32.6(9)  | 44.1(9)  | 28.2(8)  | -2.8(7)  | 2.7(7)   | -8.2(7)  |
| C4   | 28.5(8)  | 39.0(9)  | 33.6(8)  | -11.9(7) | 3.7(7)   | -1.1(7)  |
| C5   | 28.4(8)  | 28.2(8)  | 32.5(8)  | -7.5(6)  | -2.2(7)  | -0.7(6)  |
| C6   | 24.7(8)  | 26.7(7)  | 24.8(7)  | -3.8(6)  | -1.4(6)  | -2.6(6)  |
| C7   | 34.6(9)  | 30.1(8)  | 37.3(9)  | -1.7(7)  | 1.8(8)   | 3.0(7)   |
| C8   | 41.9(10) | 27.6(8)  | 54.2(11) | -7.2(8)  | 4.6(9)   | 3.5(8)   |
| C9   | 31.4(9)  | 25.0(7)  | 27.1(8)  | -0.1(6)  | 2.0(6)   | 1.8(7)   |
| C10  | 32.9(9)  | 29.9(8)  | 28.8(8)  | 1.8(6)   | 3.3(6)   | -2.0(7)  |
| C11  | 31.0(8)  | 25.0(7)  | 30.3(8)  | 1.1(6)   | 2.0(7)   | -1.3(6)  |
| C12  | 30.0(8)  | 33.4(8)  | 34.2(9)  | 1.4(7)   | 5.3(7)   | -5.3(7)  |
| C13  | 26.8(8)  | 24.5(7)  | 36.7(9)  | 1.0(6)   | 0.5(7)   | -0.2(6)  |
| C14  | 41.7(11) | 44.7(11) | 53.2(11) | -12.8(9) | -12.4(9) | -3.0(8)  |
| C15  | 38.6(9)  | 40.2(9)  | 28.2(8)  | -2.2(7)  | -0.8(7)  | -1.3(8)  |

**Table S8. Bond Lengths for 3e.**

| Atom Atom | Length/ $\text{\AA}$ | Atom Atom | Length/ $\text{\AA}$ |
|-----------|----------------------|-----------|----------------------|
|-----------|----------------------|-----------|----------------------|

---

|    |     |          |     |     |          |
|----|-----|----------|-----|-----|----------|
| O1 | C7  | 1.206(2) | C4  | C5  | 1.392(2) |
| O2 | C13 | 1.209(2) | C5  | C6  | 1.406(2) |
| O3 | C13 | 1.344(2) | C5  | C8  | 1.503(2) |
| O3 | C14 | 1.445(2) | C6  | C9  | 1.498(2) |
| C1 | C2  | 1.396(2) | C9  | C10 | 1.342(2) |
| C1 | C6  | 1.405(2) | C9  | C15 | 1.497(2) |
| C1 | C7  | 1.480(2) | C10 | C11 | 1.447(2) |
| C2 | C3  | 1.375(3) | C11 | C12 | 1.340(2) |
| C3 | C4  | 1.389(3) | C12 | C13 | 1.467(2) |

**Table S9. Bond Angles for 3e.**

| Atom | Atom | Atom | Angle/°    | Atom | Atom | Atom | Angle/°    |
|------|------|------|------------|------|------|------|------------|
| C13  | O3   | C14  | 115.13(15) | C5   | C6   | C9   | 119.94(14) |
| C2   | C1   | C6   | 120.60(15) | O1   | C7   | C1   | 123.78(17) |
| C2   | C1   | C7   | 118.73(15) | C10  | C9   | C6   | 122.12(15) |
| C6   | C1   | C7   | 120.67(15) | C10  | C9   | C15  | 122.37(15) |
| C3   | C2   | C1   | 119.87(16) | C15  | C9   | C6   | 115.47(14) |
| C2   | C3   | C4   | 119.94(16) | C9   | C10  | C11  | 123.69(15) |
| C3   | C4   | C5   | 121.56(16) | C12  | C11  | C10  | 124.92(16) |
| C4   | C5   | C6   | 118.77(15) | C11  | C12  | C13  | 119.96(15) |
| C4   | C5   | C8   | 119.85(16) | O2   | C13  | O3   | 122.91(16) |
| C6   | C5   | C8   | 121.38(16) | O2   | C13  | C12  | 125.32(15) |
| C1   | C6   | C5   | 119.25(15) | O3   | C13  | C12  | 111.76(14) |
| C1   | C6   | C9   | 120.77(14) |      |      |      |            |

**Table S10. Hydrogen Atom Coordinates ( $\text{\AA}\times 10^4$ ) and Isotropic Displacement Parameters ( $\text{\AA}^2\times 10^3$ ) for 3e.**

| Atom | x       | y       | z        | U(eq) |
|------|---------|---------|----------|-------|
| H2   | 1087.66 | 1881.46 | 8671.7   | 38    |
| H3   | -680.4  | 2518.63 | 10141.81 | 42    |
| H4   | -886.37 | 3555.5  | 9245.42  | 40    |
| H7   | 3689.99 | 2296.97 | 5008.76  | 41    |
| H8A  | 1480.27 | 4454.75 | 7043.62  | 62    |
| H8B  | -300.01 | 4397.62 | 7318.75  | 62    |
| H8C  | 441.66  | 4253.62 | 5277.03  | 62    |
| H10  | 4699.46 | 3877.36 | 4145.86  | 37    |

---

|      |         |         |          |    |
|------|---------|---------|----------|----|
| H11  | 4017.61 | 3731.05 | 8149.74  | 34 |
| H12  | 6460.75 | 4366.46 | 6548.68  | 39 |
| H14A | 8648.92 | 5193.48 | 11595.61 | 70 |
| H14B | 7996.51 | 4552.72 | 12402.64 | 70 |
| H14C | 6917.06 | 5142.85 | 12194.71 | 70 |
| H15A | 2212.63 | 2889.28 | 2525.53  | 53 |
| H15B | 2973.14 | 3530.24 | 1892.59  | 53 |
| H15C | 1277.88 | 3522.22 | 2658.56  | 53 |
